# Supplementary material
Source: Research Square preprint supplement (doi:10.21203/rs.3.rs-10029542/v1)
Supplement: Supplementary file 1 [file 0ab13d51f13864c97063dcb9.pdf]

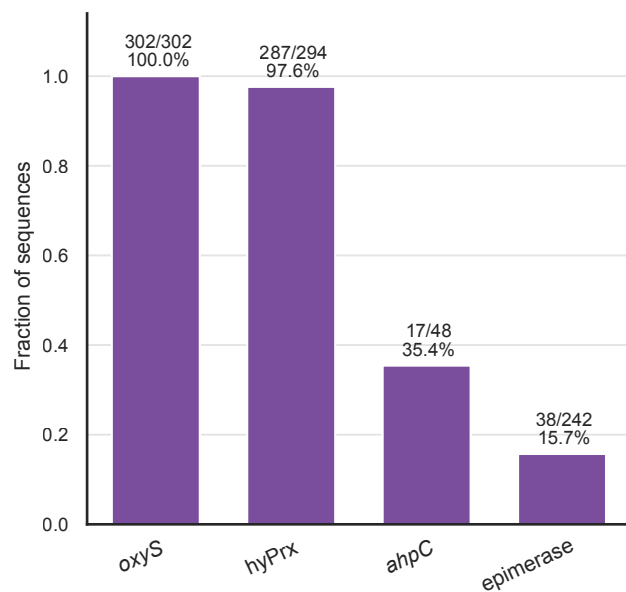

**Figure S1.** De novo motif analysis. Bars show the fraction of sequences in analyzed groups that contained a de novo motif matching either the *E. coli* or *P. aeruginosa* OxyR PWM. Bar labels give positive sequences over total sequences in analyzed groups, followed by the percentage.
