# Supplementary material
Source: Research Square preprint supplement (doi:10.21203/rs.3.rs-10029542/v1)
Supplement: Supplementary file 2 [file 11bb588478565e6faf0c1ec6.docx]

**SUPPLEMENTAL INFORMATION**

**Figure S1.** De novo motif analysis. Bars show the fraction of sequences in analyzed groups that contained a de novo motif matching either the *E. coli* or *P. aeruginosa* OxyR PWM. Bar labels give positive sequences over total sequences in analyzed groups, followed by the percentage.

**Table S1.** Genomes with protein-coding genes as *oxyR* neighbor.

**Table S2.** Genomes with *oxyS* as *oxyR* neighbor.

**Table S3**. Nonredundant *oxyR*-neighbor types in Gammaproteobacteria.

**Table S4.** Types of *oxyR*-neighbors with potential oxidative-stress-related functions.

**Table S5.** List of phylogenetic marker genes.

**Supplemental Dataset S1.** Full Gammaproteobacteria tree inNewick format.
