# Supplementary material
Source: Research Square preprint supplement (doi:10.21203/rs.3.rs-10029542/v1)
Supplement: Supplementary file 2 [file f8fc32daf52d6df98f68e8e0.xlsx]

## Sheet: S1 protein neighbors
Species	Family	Order	genome.BRC_id	oxyR copies	oxyR_1.BRC_id	neighbor_1.BRC_id	oxyR_1 vs. neighbor_1 orientation	neighbor_1.product	oxyR_2.BRC_id	neighbor_2.BRC_id	oxyR_2 vs. neighbor_2 orientation	neighbor_2.product	oxyR_3.BRC_id	neighbor_3.BRC_id	oxyR_3 vs. neighbor_3 orientation	neighbor_3.product
Sulfuricaulis limicola	Acidiferrobacteraceae.1692041	Acidiferrobacterales.1692040	1.62022e+06	1	fig|1620215.5.peg.98	fig|1620215.5.peg.97	opposite strand	Catalase-peroxidase KatG (EC 1.11.1.21)
Sulfurifustis variabilis	Acidiferrobacteraceae.1692041	Acidiferrobacterales.1692040	1.67569e+06	1	fig|1675686.5.peg.3717	fig|1675686.5.peg.3718	opposite strand	Nitric oxide reductase activation protein NorD
Aeromonas cavernicola	Aeromonadaceae.84642	Aeromonadales.135624	1.00662e+06	1	fig|1006623.3.peg.121	fig|1006623.3.peg.123	opposite strand	Septum site-determining protein MinC
Tolumonas auensis	Aeromonadaceae.84642	Aeromonadales.135624	595494	1	fig|595494.3.peg.2591	fig|595494.3.peg.2592	opposite strand	Soluble cytochrome b562
Aeromonas bestiarum	Aeromonadaceae.84642	Aeromonadales.135624	105752	1	fig|105751.6.peg.856	fig|105751.6.peg.855	same strand	Methyl-accepting chemotaxis sensor/transducer protein
Aeromonas hydrophila	Aeromonadaceae.84642	Aeromonadales.135624	1.07338e+06	1	fig|1073377.4.peg.275	fig|1073377.4.peg.274	same strand	Methyl-accepting chemotaxis sensor/transducer protein
Aeromonas veronii	Aeromonadaceae.84642	Aeromonadales.135624	1.07338e+06	1	fig|1073382.3.peg.945	fig|1073382.3.peg.946	same strand	Methyl-accepting chemotaxis sensor/transducer protein
Aeromonas australiensis	Aeromonadaceae.84642	Aeromonadales.135624	1.11488e+06	1	fig|1114880.3.peg.2662	fig|1114880.3.peg.2661	same strand	Methyl-accepting chemotaxis sensor/transducer protein
Aeromonas aquariorum	Aeromonadaceae.84642	Aeromonadales.135624	1.1568e+06	1	fig|1156800.5.peg.276	fig|1156800.5.peg.275	same strand	Methyl-accepting chemotaxis sensor/transducer protein
Aeromonas molluscorum	Aeromonadaceae.84642	Aeromonadales.135624	1.26824e+06	1	fig|1268236.3.peg.3998	fig|1268236.3.peg.3997	same strand	Thioredoxin-like protein clustered with PA0057
Oceanimonas smirnovii	Aeromonadaceae.84642	Aeromonadales.135624	1.27902e+06	1	fig|1279015.4.peg.112	fig|1279015.4.peg.113	same strand	Hybrid peroxiredoxin hyPrx5 (EC 1.11.1.15)
Oceanimonas baumannii	Aeromonadaceae.84642	Aeromonadales.135624	129578	1	fig|129578.4.peg.903	fig|129578.4.peg.904	same strand	Hybrid peroxiredoxin hyPrx5 (EC 1.11.1.15)
Oceanisphaera psychrotolerans	Aeromonadaceae.84642	Aeromonadales.135624	1.41465e+06	1	fig|1414654.3.peg.1136	fig|1414654.3.peg.1137	same strand	Dihydrolipoamide dehydrogenase (EC 1.8.1.4)
Oceanisphaera profunda	Aeromonadaceae.84642	Aeromonadales.135624	1.41663e+06	1	fig|1416627.3.peg.937	fig|1416627.3.peg.938	same strand	Dihydrolipoamide dehydrogenase (EC 1.8.1.4)
Aeromonas dhakensis	Aeromonadaceae.84642	Aeromonadales.135624	196024	1	fig|196024.23.peg.387	fig|196024.23.peg.386	same strand	Methyl-accepting chemotaxis sensor/transducer protein
Aeromonas simiae	Aeromonadaceae.84642	Aeromonadales.135624	218936	1	fig|218936.3.peg.3326	fig|218936.3.peg.3325	same strand	Lysyl-tRNA synthetase (class II) (EC 6.1.1.6)
Aeromonas tecta	Aeromonadaceae.84642	Aeromonadales.135624	324617	1	fig|324617.3.peg.3130	fig|324617.3.peg.3131	same strand	Methyl-accepting chemotaxis sensor/transducer protein
Zobellella denitrificans	Aeromonadaceae.84642	Aeromonadales.135624	347535	1	fig|347534.7.peg.3182	fig|347534.7.peg.3183	same strand	Dihydrolipoamide dehydrogenase (EC 1.8.1.4)
Zobellella taiwanensis	Aeromonadaceae.84642	Aeromonadales.135624	347535	1	fig|347535.3.peg.1195	fig|347535.3.peg.1194	same strand	Hybrid peroxiredoxin hyPrx5 (EC 1.11.1.15)
Aeromonas bivalvium	Aeromonadaceae.84642	Aeromonadales.135624	440080	1	fig|440079.5.peg.1246	fig|440079.5.peg.1245	same strand	Thioredoxin-like protein clustered with PA0057
Aeromonas diversa	Aeromonadaceae.84642	Aeromonadales.135624	502790	1	fig|502790.3.peg.2493	fig|502790.3.peg.2492	same strand	Lysyl-tRNA synthetase (class II) (EC 6.1.1.6)
Aeromonas aquatica	Aeromonadaceae.84642	Aeromonadales.135624	558964	1	fig|558964.4.peg.3315	fig|558964.4.peg.3316	same strand	Methyl-accepting chemotaxis sensor/transducer protein
Aeromonas fluvialis	Aeromonadaceae.84642	Aeromonadales.135624	591962	1	fig|591962.3.peg.3465	fig|591962.3.peg.3466	same strand	Metallo-beta-lactamase superfamily protein PA0057
Aeromonas piscicola	Aeromonadaceae.84642	Aeromonadales.135624	600645	1	fig|600645.3.peg.1674	fig|600645.3.peg.1673	same strand	Methyl-accepting chemotaxis sensor/transducer protein
Aeromonas sanarellii	Aeromonadaceae.84642	Aeromonadales.135624	633415	1	fig|633415.3.peg.3374	fig|633415.3.peg.3373	same strand	Thioredoxin-like protein clustered with PA0057
Aeromonas taiwanensis	Aeromonadaceae.84642	Aeromonadales.135624	633417	1	fig|633417.4.peg.2460	fig|633417.4.peg.2459	same strand	Thioredoxin-like protein clustered with PA0057
Oceanisphaera arctica	Aeromonadaceae.84642	Aeromonadales.135624	641510	1	fig|641510.4.peg.1569	fig|641510.4.peg.1570	same strand	Hybrid peroxiredoxin hyPrx5 (EC 1.11.1.15)
Aeromonas salmonicida	Aeromonadaceae.84642	Aeromonadales.135624	645.8	1	fig|645.8.peg.1141	fig|645.8.peg.1142	same strand	Methyl-accepting chemotaxis sensor/transducer protein
Aeromonas sobria	Aeromonadaceae.84642	Aeromonadales.135624	646.4	1	fig|646.4.peg.1725	fig|646.4.peg.1724	same strand	Methyl-accepting chemotaxis sensor/transducer protein
Aeromonas rivuli	Aeromonadaceae.84642	Aeromonadales.135624	648794	1	fig|648794.3.peg.1185	fig|648794.3.peg.1186	same strand	Thioredoxin-like protein clustered with PA0057
Aeromonas jandaei	Aeromonadaceae.84642	Aeromonadales.135624	650.3	1	fig|650.3.peg.343	fig|650.3.peg.344	same strand	Methyl-accepting chemotaxis sensor/transducer protein
Aeromonas media	Aeromonadaceae.84642	Aeromonadales.135624	651.4	1	fig|651.4.peg.1001	fig|651.4.peg.1000	same strand	Thioredoxin-like protein clustered with PA0057
Aeromonas schubertii	Aeromonadaceae.84642	Aeromonadales.135624	652.6	1	fig|652.6.peg.3193	fig|652.6.peg.3194	same strand	Lysyl-tRNA synthetase (class II) (EC 6.1.1.6)
Aeromonas allosaccharophila	Aeromonadaceae.84642	Aeromonadales.135624	656.4	1	fig|656.4.peg.4289	fig|656.4.peg.4290	same strand	Methyl-accepting chemotaxis sensor/transducer protein
Aeromonas encheleia	Aeromonadaceae.84642	Aeromonadales.135624	73010.3	1	fig|73010.3.peg.1524	fig|73010.3.peg.1525	same strand	Methyl-accepting chemotaxis sensor/transducer protein
Oceanimonas doudoroffii	Aeromonadaceae.84642	Aeromonadales.135624	84158.3	1	fig|84158.3.peg.1927	fig|84158.3.peg.1929	same strand	Hybrid peroxiredoxin hyPrx5 (EC 1.11.1.15)
Aeromonas caviae	Aeromonadaceae.84642	Aeromonadales.135624	878320	1	fig|878320.4.peg.1621	fig|878320.4.peg.1620	same strand	Thioredoxin-like protein clustered with PA0057
Aeromonas lusitana	Aeromonadaceae.84642	Aeromonadales.135624	931530	1	fig|931529.6.peg.2894	fig|931529.6.peg.2893	same strand	Methyl-accepting chemotaxis sensor/transducer protein
Aeromonas rivipollensis	Aeromonadaceae.84642	Aeromonadales.135624	948520	1	fig|948519.9.peg.2065	fig|948519.9.peg.2066	same strand	Thioredoxin-like protein clustered with PA0057
Marinobacter lipolyticus	Alteromonadaceae.72275	Alteromonadales.135622	1.04672e+06	1	fig|1046724.3.peg.280	fig|1046724.3.peg.281	opposite strand	Nucleoside-diphosphate-sugar epimerases
Marinobacter manganoxydans	Alteromonadaceae.72275	Alteromonadales.135622	1.09498e+06	1	fig|1094979.3.peg.232	fig|1094979.3.peg.233	opposite strand	Nucleoside-diphosphate-sugar epimerases
Aliagarivorans marinus	Alteromonadaceae.72275	Alteromonadales.135622	1.12097e+06	1	fig|1120969.3.peg.4134	fig|1120969.3.peg.4133	opposite strand	hypothetical protein
Aliagarivorans taiwanensis	Alteromonadaceae.72275	Alteromonadales.135622	1.12097e+06	1	fig|1120970.3.peg.3566	fig|1120970.3.peg.3565	opposite strand	hypothetical protein
Marinobacter daepoensis	Alteromonadaceae.72275	Alteromonadales.135622	1.1222e+06	1	fig|1122197.3.peg.2332	fig|1122197.3.peg.2331	opposite strand	Nucleoside-diphosphate-sugar epimerases
Glaciecola lipolytica	Alteromonadaceae.72275	Alteromonadales.135622	1.12767e+06	1	fig|1127673.3.peg.713	fig|1127673.3.peg.714	opposite strand	Alkyl hydroperoxide reductase protein C (EC 1.11.1.15)
Marinobacter santoriniensis	Alteromonadaceae.72275	Alteromonadales.135622	1.28883e+06	1	fig|1288826.3.peg.3459	fig|1288826.3.peg.3458	opposite strand	Nucleoside-diphosphate-sugar epimerases
Marinobacter excellens	Alteromonadaceae.72275	Alteromonadales.135622	1.30573e+06	1	fig|1305731.4.peg.2523	fig|1305731.4.peg.2524	opposite strand	Nucleoside-diphosphate-sugar epimerases
Marinobacter halophilus	Alteromonadaceae.72275	Alteromonadales.135622	1.32374e+06	1	fig|1323740.3.peg.516	fig|1323740.3.peg.515	opposite strand	Nucleoside-diphosphate-sugar epimerases
Marinobacter lutaoensis	Alteromonadaceae.72275	Alteromonadales.135622	135739	1	fig|135739.3.peg.744	fig|135739.3.peg.743	opposite strand	Nucleoside-diphosphate-sugar epimerases
Marinobacter shengliensis	Alteromonadaceae.72275	Alteromonadales.135622	1.38922e+06	1	fig|1389223.3.peg.1636	fig|1389223.3.peg.1635	opposite strand	Nucleoside-diphosphate-sugar epimerases
Marinobacter similis	Alteromonadaceae.72275	Alteromonadales.135622	1.42092e+06	1	fig|1420916.4.peg.2953	fig|1420916.4.peg.2952	opposite strand	Nucleoside-diphosphate-sugar epimerases
Marinobacter salarius	Alteromonadaceae.72275	Alteromonadales.135622	1.42092e+06	1	fig|1420917.4.peg.915	fig|1420917.4.peg.914	opposite strand	Nucleoside-diphosphate-sugar epimerases
Tamilnaduibacter salinus	Alteromonadaceae.72275	Alteromonadales.135622	1.48406e+06	1	fig|1484056.5.peg.1622	fig|1484056.5.peg.1621	opposite strand	Nucleoside-diphosphate-sugar epimerases
Marinobacter aromaticivorans	Alteromonadaceae.72275	Alteromonadales.135622	1.49408e+06	1	fig|1494078.3.peg.879	fig|1494078.3.peg.880	opposite strand	Nucleoside-diphosphate-sugar epimerases
Catenovulum maritimum	Alteromonadaceae.72275	Alteromonadales.135622	1.51327e+06	1	fig|1513271.7.peg.2532	fig|1513271.7.peg.2534	opposite strand	Alkyl hydroperoxide reductase protein C (EC 1.11.1.15)
Marinobacter piscensis	Alteromonadaceae.72275	Alteromonadales.135622	1.56231e+06	1	fig|1562308.3.peg.1118	fig|1562308.3.peg.1117	opposite strand	Nucleoside-diphosphate-sugar epimerases
Marinobacter halotolerans	Alteromonadaceae.72275	Alteromonadales.135622	1.56921e+06	1	fig|1569211.4.peg.2005	fig|1569211.4.peg.2004	opposite strand	Nucleoside-diphosphate-sugar epimerases
Marinobacter confluentis	Alteromonadaceae.72275	Alteromonadales.135622	1.69756e+06	1	fig|1697557.4.peg.3228	fig|1697557.4.peg.3229	opposite strand	Nucleoside-diphosphate-sugar epimerases
Marinobacter litoralis	Alteromonadaceae.72275	Alteromonadales.135622	187981	1	fig|187981.3.peg.2001	fig|187981.3.peg.2002	opposite strand	Nucleoside-diphosphate-sugar epimerases
Marinobacter salexigens	Alteromonadaceae.72275	Alteromonadales.135622	1.92576e+06	1	fig|1925763.3.peg.1889	fig|1925763.3.peg.1888	opposite strand	Nucleoside-diphosphate-sugar epimerases
Marinobacter bohaiensis	Alteromonadaceae.72275	Alteromonadales.135622	2.2019e+06	1	fig|2201898.3.peg.3794	fig|2201898.3.peg.3795	opposite strand	Nucleoside-diphosphate-sugar epimerases
Marinobacter adhaerens	Alteromonadaceae.72275	Alteromonadales.135622	225937	1	fig|225937.3.peg.303	fig|225937.3.peg.302	opposite strand	Nucleoside-diphosphate-sugar epimerases
Marinobacter flavimaris	Alteromonadaceae.72275	Alteromonadales.135622	262076	1	fig|262076.4.peg.1058	fig|262076.4.peg.1057	opposite strand	Nucleoside-diphosphate-sugar epimerases
Marinobacter hydrocarbonoclasticus	Alteromonadaceae.72275	Alteromonadales.135622	2743.3	1	fig|2743.3.peg.463	fig|2743.3.peg.462	opposite strand	Nucleoside-diphosphate-sugar epimerases
Marinobacter maritimus	Alteromonadaceae.72275	Alteromonadales.135622	277961	1	fig|277961.3.peg.3087	fig|277961.3.peg.3086	opposite strand	Nucleoside-diphosphate-sugar epimerases
Marinobacter psychrophilus	Alteromonadaceae.72275	Alteromonadales.135622	330734	1	fig|330734.3.peg.645	fig|330734.3.peg.644	opposite strand	Nucleoside-diphosphate-sugar epimerases
Marinobacter aquaeolei	Alteromonadaceae.72275	Alteromonadales.135622	351349	1	fig|351348.9.peg.1034	fig|351348.9.peg.1033	opposite strand	Nucleoside-diphosphate-sugar epimerases
Marinobacter vinifirmus	Alteromonadaceae.72275	Alteromonadales.135622	355592	1	fig|355591.9.peg.2240	fig|355591.9.peg.2239	opposite strand	Nucleoside-diphosphate-sugar epimerases
Marinobacter gudaonensis	Alteromonadaceae.72275	Alteromonadales.135622	375760	1	fig|375760.4.peg.3429	fig|375760.4.peg.3428	opposite strand	Nucleoside-diphosphate-sugar epimerases
Marinobacter pelagius	Alteromonadaceae.72275	Alteromonadales.135622	379483	1	fig|379482.7.peg.72	fig|379482.7.peg.73	opposite strand	Nucleoside-diphosphate-sugar epimerases
Marinobacter salsuginis	Alteromonadaceae.72275	Alteromonadales.135622	418719	1	fig|418719.19.peg.3656	fig|418719.19.peg.3655	opposite strand	Nucleoside-diphosphate-sugar epimerases
Marinobacter segnicrescens	Alteromonadaceae.72275	Alteromonadales.135622	430454	1	fig|430453.7.peg.798	fig|430453.7.peg.799	opposite strand	Nucleoside-diphosphate-sugar epimerases
Marinobacter guineae	Alteromonadaceae.72275	Alteromonadales.135622	432303	1	fig|432303.3.peg.1685	fig|432303.3.peg.1686	opposite strand	Nucleoside-diphosphate-sugar epimerases
Marinobacter salicampi	Alteromonadaceae.72275	Alteromonadales.135622	435907	1	fig|435907.3.peg.813	fig|435907.3.peg.814	opposite strand	Nucleoside-diphosphate-sugar epimerases
Marinobacter algicola	Alteromonadaceae.72275	Alteromonadales.135622	443152	1	fig|443152.3.peg.1919	fig|443152.3.peg.1920	opposite strand	Nucleoside-diphosphate-sugar epimerases
Marinobacter mobilis	Alteromonadaceae.72275	Alteromonadales.135622	488533	1	fig|488533.3.peg.1759	fig|488533.3.peg.1760	opposite strand	Nucleoside-diphosphate-sugar epimerases
Marinobacter zhejiangensis	Alteromonadaceae.72275	Alteromonadales.135622	488535	1	fig|488535.3.peg.1069	fig|488535.3.peg.1068	opposite strand	Nucleoside-diphosphate-sugar epimerases
Marinobacter antarcticus	Alteromonadaceae.72275	Alteromonadales.135622	564117	1	fig|564117.3.peg.45	fig|564117.3.peg.46	opposite strand	Nucleoside-diphosphate-sugar epimerases
Marinobacter nanhaiticus	Alteromonadaceae.72275	Alteromonadales.135622	626887	1	fig|626887.3.peg.930	fig|626887.3.peg.931	opposite strand	Nucleoside-diphosphate-sugar epimerases
Marinobacter daqiaonensis	Alteromonadaceae.72275	Alteromonadales.135622	650892	1	fig|650891.7.peg.51	fig|650891.7.peg.52	opposite strand	Nucleoside-diphosphate-sugar epimerases
Agarivorans gilvus	Alteromonadaceae.72275	Alteromonadales.135622	680280	1	fig|680279.7.peg.2019	fig|680279.7.peg.2020	opposite strand	hypothetical protein
Marinobacter persicus	Alteromonadaceae.72275	Alteromonadales.135622	930118	1	fig|930118.4.peg.757	fig|930118.4.peg.756	opposite strand	Nucleoside-diphosphate-sugar epimerases
Agarivorans albus	Alteromonadaceae.72275	Alteromonadales.135622	1.33101e+06	1	fig|1331007.4.peg.4104	fig|1331007.4.peg.4105	same strand	hypothetical protein
Thalassotalea euphylliae	Colwelliaceae.267889	Alteromonadales.135622	1.65523e+06	1	fig|1655234.8.peg.3780	fig|1655234.8.peg.3779	opposite strand	Catalase-peroxidase KatG (EC 1.11.1.21)
Thalassotalea litorea	Colwelliaceae.267889	Alteromonadales.135622	2.02072e+06	1	fig|2020715.3.peg.934	fig|2020715.3.peg.935	opposite strand	Alkyl hydroperoxide reductase protein C (EC 1.11.1.15)
Colwellia chukchiensis	Colwelliaceae.267889	Alteromonadales.135622	641665	1	fig|641665.4.peg.1071	fig|641665.4.peg.1069	opposite strand	Alkyl hydroperoxide reductase protein C (EC 1.11.1.15)
Litorilituus sediminis	Colwelliaceae.267889	Alteromonadales.135622	718192	1	fig|718192.4.peg.3710	fig|718192.4.peg.3708	opposite strand	Transposase
Colwellia hornerae	Colwelliaceae.267889	Alteromonadales.135622	89402.5	1	fig|89402.5.peg.2570	fig|89402.5.peg.2571	opposite strand	Alkyl hydroperoxide reductase protein C (EC 1.11.1.15)
Colwellia piezophila	Colwelliaceae.267889	Alteromonadales.135622	1.2655e+06	1	fig|1265503.3.peg.81	fig|1265503.3.peg.82	same strand	Transporter, LysE family
Paraferrimonas sedimenticola	Ferrimonadaceae.267892	Alteromonadales.135622	375674	1	fig|375674.3.peg.2543	fig|375674.3.peg.2542	opposite strand	Alkyl hydroperoxide reductase protein C (EC 1.11.1.15)
Ferrimonas balearica	Ferrimonadaceae.267892	Alteromonadales.135622	44012.3	1	fig|44012.3.peg.112	fig|44012.3.peg.114	opposite strand	Alkyl hydroperoxide reductase protein C (EC 1.11.1.15)
Moritella dasanensis	Moritellaceae.267891	Alteromonadales.135622	1.20129e+06	1	fig|1201293.3.peg.2206	fig|1201293.3.peg.2205	opposite strand	hypothetical protein
Moritella marina	Moritellaceae.267891	Alteromonadales.135622	1.20296e+06	1	fig|1202962.7.peg.3375	fig|1202962.7.peg.3374	opposite strand	hypothetical protein
Moritella yayanosii	Moritellaceae.267891	Alteromonadales.135622	69539.4	1	fig|69539.4.peg.3315	fig|69539.4.peg.3314	opposite strand	hypothetical protein
Moritella viscosa	Moritellaceae.267891	Alteromonadales.135622	80854.1	1	fig|80854.11.peg.4253	fig|80854.11.peg.4254	opposite strand	hypothetical protein
Pseudoalteromonas arctica	Pseudoalteromonadaceae.267888	Alteromonadales.135622	1.11731e+06	1	fig|1117313.3.peg.943	fig|1117313.3.peg.942	opposite strand	Hybrid peroxiredoxin hyPrx5 (EC 1.11.1.15)
Pseudoalteromonas marina	Pseudoalteromonadaceae.267888	Alteromonadales.135622	1.11732e+06	1	fig|1117316.3.peg.477	fig|1117316.3.peg.476	opposite strand	Hybrid peroxiredoxin hyPrx5 (EC 1.11.1.15)
Pseudoalteromonas undina	Pseudoalteromonadaceae.267888	Alteromonadales.135622	1.11732e+06	1	fig|1117320.3.peg.213	fig|1117320.3.peg.212	opposite strand	Hybrid peroxiredoxin hyPrx5 (EC 1.11.1.15)
Pseudoalteromonas denitrificans	Pseudoalteromonadaceae.267888	Alteromonadales.135622	1.12301e+06	1	fig|1123010.3.peg.4058	fig|1123010.3.peg.4057	opposite strand	Catalase-peroxidase KatG (EC 1.11.1.21)
Pseudoalteromonas shioyasakiensis	Pseudoalteromonadaceae.267888	Alteromonadales.135622	1.19081e+06	1	fig|1190813.3.peg.3417	fig|1190813.3.peg.3416	opposite strand	Hybrid peroxiredoxin hyPrx5 (EC 1.11.1.15)
Pseudoalteromonas agarivorans	Pseudoalteromonadaceae.267888	Alteromonadales.135622	1.31237e+06	1	fig|1312369.5.peg.891	fig|1312369.5.peg.890	opposite strand	Hybrid peroxiredoxin hyPrx5 (EC 1.11.1.15)
Pseudoalteromonas carrageenovora	Pseudoalteromonadaceae.267888	Alteromonadales.135622	1.31487e+06	1	fig|1314868.3.peg.2460	fig|1314868.3.peg.2461	opposite strand	Hybrid peroxiredoxin hyPrx5 (EC 1.11.1.15)
Pseudoalteromonas tetraodonis	Pseudoalteromonadaceae.267888	Alteromonadales.135622	1.31527e+06	1	fig|1315271.8.peg.731	fig|1315271.8.peg.732	opposite strand	Hybrid peroxiredoxin hyPrx5 (EC 1.11.1.15)
Pseudoalteromonas flavipulchra	Pseudoalteromonadaceae.267888	Alteromonadales.135622	1.31527e+06	1	fig|1315273.3.peg.882	fig|1315273.3.peg.883	opposite strand	Hybrid peroxiredoxin hyPrx5 (EC 1.11.1.15)
Pseudoalteromonas translucida	Pseudoalteromonadaceae.267888	Alteromonadales.135622	1.31528e+06	1	fig|1315283.4.peg.763	fig|1315283.4.peg.762	opposite strand	Hybrid peroxiredoxin hyPrx5 (EC 1.11.1.15)
Pseudoalteromonas issachenkonii	Pseudoalteromonadaceae.267888	Alteromonadales.135622	152297	1	fig|152297.3.peg.2293	fig|152297.3.peg.2294	opposite strand	Hybrid peroxiredoxin hyPrx5 (EC 1.11.1.15)
Pseudoalteromonas telluritireducens	Pseudoalteromonadaceae.267888	Alteromonadales.135622	162160	1	fig|162160.3.peg.818	fig|162160.3.peg.819	opposite strand	Hybrid peroxiredoxin hyPrx5 (EC 1.11.1.15)
Pseudoalteromonas profundi	Pseudoalteromonadaceae.267888	Alteromonadales.135622	1.77496e+06	1	fig|1774956.3.peg.3080	fig|1774956.3.peg.3081	opposite strand	Hybrid peroxiredoxin hyPrx5 (EC 1.11.1.15)
Pseudoalteromonas prydzensis	Pseudoalteromonadaceae.267888	Alteromonadales.135622	182141	1	fig|182141.3.peg.2119	fig|182141.3.peg.2118	opposite strand	Hybrid peroxiredoxin hyPrx5 (EC 1.11.1.15)
Pseudoalteromonas neustonica	Pseudoalteromonadaceae.267888	Alteromonadales.135622	1.84033e+06	1	fig|1840331.8.peg.429	fig|1840331.8.peg.428	opposite strand	Hybrid peroxiredoxin hyPrx5 (EC 1.11.1.15)
Pseudoalteromonas fuliginea	Pseudoalteromonadaceae.267888	Alteromonadales.135622	1.87268e+06	1	fig|1872678.7.peg.2454	fig|1872678.7.peg.2453	opposite strand	Hybrid peroxiredoxin hyPrx5 (EC 1.11.1.15)
Pseudoalteromonas porphyrae	Pseudoalteromonadaceae.267888	Alteromonadales.135622	187330	1	fig|187330.3.peg.3662	fig|187330.3.peg.3661	opposite strand	Hybrid peroxiredoxin hyPrx5 (EC 1.11.1.15)
Pseudoalteromonas mariniglutinosa	Pseudoalteromonadaceae.267888	Alteromonadales.135622	206042	1	fig|206042.3.peg.1935	fig|206042.3.peg.1936	opposite strand	Hybrid peroxiredoxin hyPrx5 (EC 1.11.1.15)
Pseudoalteromonas aliena	Pseudoalteromonadaceae.267888	Alteromonadales.135622	247523	1	fig|247523.3.peg.2500	fig|247523.3.peg.2499	opposite strand	Hybrid peroxiredoxin hyPrx5 (EC 1.11.1.15)
Pseudoalteromonas espejiana	Pseudoalteromonadaceae.267888	Alteromonadales.135622	28107.3	1	fig|28107.3.peg.2515	fig|28107.3.peg.2516	opposite strand	Hybrid peroxiredoxin hyPrx5 (EC 1.11.1.15)
Pseudoalteromonas nigrifaciens	Pseudoalteromonadaceae.267888	Alteromonadales.135622	28109.4	1	fig|28109.4.peg.803	fig|28109.4.peg.802	opposite strand	Hybrid peroxiredoxin hyPrx5 (EC 1.11.1.15)
Pseudoalteromonas atlantica	Pseudoalteromonadaceae.267888	Alteromonadales.135622	288.4	1	fig|288.4.peg.839	fig|288.4.peg.838	opposite strand	Hybrid peroxiredoxin hyPrx5 (EC 1.11.1.15)
Pseudoalteromonas spongiae	Pseudoalteromonadaceae.267888	Alteromonadales.135622	298657	1	fig|298657.11.peg.1337	fig|298657.11.peg.1336	opposite strand	Catalase-peroxidase KatG (EC 1.11.1.21)
Pseudoalteromonas haloplanktis	Pseudoalteromonadaceae.267888	Alteromonadales.135622	326443	1	fig|326442.8.peg.724	fig|326442.8.peg.723	opposite strand	Hybrid peroxiredoxin hyPrx5 (EC 1.11.1.15)
Pseudoalteromonas citrea	Pseudoalteromonadaceae.267888	Alteromonadales.135622	43655.3	1	fig|43655.3.peg.3929	fig|43655.3.peg.3928	opposite strand	Hybrid peroxiredoxin hyPrx5 (EC 1.11.1.15)
Pseudoalteromonas luteoviolacea	Pseudoalteromonadaceae.267888	Alteromonadales.135622	43657.3	1	fig|43657.34.peg.1878	fig|43657.34.peg.1877	opposite strand	Catalase-peroxidase KatG (EC 1.11.1.21)
Psychrosphaera haliotis	Pseudoalteromonadaceae.267888	Alteromonadales.135622	555083	1	fig|555083.3.peg.1879	fig|555083.3.peg.1878	opposite strand	Alkyl hydroperoxide reductase protein C (EC 1.11.1.15)
Pseudoalteromonas lipolytica	Pseudoalteromonadaceae.267888	Alteromonadales.135622	570157	1	fig|570156.6.peg.2825	fig|570156.6.peg.2826	opposite strand	Hybrid peroxiredoxin hyPrx5 (EC 1.11.1.15)
Pseudoalteromonas donghaensis	Pseudoalteromonadaceae.267888	Alteromonadales.135622	621376	1	fig|621376.3.peg.890	fig|621376.3.peg.889	opposite strand	Hybrid peroxiredoxin hyPrx5 (EC 1.11.1.15)
Psychrosphaera saromensis	Pseudoalteromonadaceae.267888	Alteromonadales.135622	716813	1	fig|716813.3.peg.3095	fig|716813.3.peg.3094	opposite strand	Alkyl hydroperoxide reductase protein C (EC 1.11.1.15)
Pseudoalteromonas distincta	Pseudoalteromonadaceae.267888	Alteromonadales.135622	77608.3	1	fig|77608.3.peg.237	fig|77608.3.peg.238	opposite strand	Hybrid peroxiredoxin hyPrx5 (EC 1.11.1.15)
Pseudoalteromonas elyakovii	Pseudoalteromonadaceae.267888	Alteromonadales.135622	81037.7	1	fig|81037.7.peg.3239	fig|81037.7.peg.3238	opposite strand	Hybrid peroxiredoxin hyPrx5 (EC 1.11.1.15)
Pseudoalteromonas arabiensis	Pseudoalteromonadaceae.267888	Alteromonadales.135622	874454	1	fig|874454.3.peg.1639	fig|874454.3.peg.1638	opposite strand	Hybrid peroxiredoxin hyPrx5 (EC 1.11.1.15)
Psychromonas arctica	Psychromonadaceae.267894	Alteromonadales.135622	1.12304e+06	1	fig|1123036.3.peg.1173	fig|1123036.3.peg.1172	opposite strand	hypothetical protein
Psychromonas hadalis	Psychromonadaceae.267894	Alteromonadales.135622	1.2783e+06	1	fig|1278302.3.peg.610	fig|1278302.3.peg.611	opposite strand	hypothetical protein
Psychromonas ossibalaenae	Psychromonadaceae.267894	Alteromonadales.135622	1.27831e+06	1	fig|1278307.3.peg.3571	fig|1278307.3.peg.3572	opposite strand	hypothetical protein
Psychromonas aquimarina	Psychromonadaceae.267894	Alteromonadales.135622	1.27831e+06	1	fig|1278312.3.peg.1426	fig|1278312.3.peg.1427	opposite strand	hypothetical protein
Psychromonas ingrahamii	Psychromonadaceae.267894	Alteromonadales.135622	357805	1	fig|357804.7.peg.3859	fig|357804.7.peg.3858	opposite strand	tRNA (guanosine(18)-2'-O)-methyltransferase (EC 2.1.1.34)
Shewanella sediminis	Shewanellaceae.267890	Alteromonadales.135622	271097	1	fig|271097.3.peg.528	fig|271097.3.peg.526	opposite strand	Alkyl hydroperoxide reductase protein C (EC 1.11.1.15)
Arenicella xantha	Arenicellaceae.1617891	Arenicellales.1617890	644221	1	fig|644221.3.peg.3825	fig|644221.3.peg.3823	same strand	Hybrid peroxiredoxin hyPrx5 (EC 1.11.1.15)
Suttonella indologenes	Cardiobacteriaceae.868	Cardiobacteriales.135615	13276.5	1	fig|13276.5.peg.2385	fig|13276.5.peg.2384	opposite strand	Alkyl hydroperoxide reductase protein C (EC 1.11.1.15)
Cardiobacterium valvarum	Cardiobacteriaceae.868	Cardiobacteriales.135615	194702	1	fig|194702.3.peg.423	fig|194702.3.peg.425	opposite strand	Alkyl hydroperoxide reductase protein C (EC 1.11.1.15)
Dichelobacter nodosus	Cardiobacteriaceae.868	Cardiobacteriales.135615	246195	1	fig|246195.4.peg.141	fig|246195.4.peg.142	opposite strand	Alkyl hydroperoxide reductase protein C (EC 1.11.1.15)
Suttonella ornithocola	Cardiobacteriaceae.868	Cardiobacteriales.135615	279832	1	fig|279832.4.peg.587	fig|279832.4.peg.586	opposite strand	Alkyl hydroperoxide reductase protein C (EC 1.11.1.15)
Cardiobacterium hominis	Cardiobacteriaceae.868	Cardiobacteriales.135615	638300	1	fig|638300.3.peg.2139	fig|638300.3.peg.2140	opposite strand	Alkyl hydroperoxide reductase protein C (EC 1.11.1.15)
Ignatzschineria larvae	Ignatzschineriaceae.3018589	Cardiobacteriales.135615	1.11173e+06	1	fig|1111732.3.peg.255	fig|1111732.3.peg.254	opposite strand	2-oxoglutarate dehydrogenase E1 component (EC 1.2.4.2)
Wohlfahrtiimonas larvae	Ignatzschineriaceae.3018589	Cardiobacteriales.135615	1.15799e+06	1	fig|1157986.3.peg.1491	fig|1157986.3.peg.1490	opposite strand	2-oxoglutarate dehydrogenase E1 component (EC 1.2.4.2)
Wohlfahrtiimonas chitiniclastica	Ignatzschineriaceae.3018589	Cardiobacteriales.135615	400946	1	fig|400946.13.peg.1330	fig|400946.13.peg.1331	opposite strand	2-oxoglutarate dehydrogenase E1 component (EC 1.2.4.2)
Ignatzschineria ureiclastica	Ignatzschineriaceae.3018589	Cardiobacteriales.135615	472582	1	fig|472582.3.peg.1796	fig|472582.3.peg.1795	opposite strand	2-oxoglutarate dehydrogenase E1 component (EC 1.2.4.2)
Ignatzschineria indica	Ignatzschineriaceae.3018589	Cardiobacteriales.135615	472583	1	fig|472583.3.peg.2205	fig|472583.3.peg.2206	opposite strand	2-oxoglutarate dehydrogenase E1 component (EC 1.2.4.2)
Gilvimarinus chinensis	Cellvibrionaceae.1706371	Cellvibrionales.1706369	1.12192e+06	1	fig|1121921.14.peg.106	fig|1121921.14.peg.107	opposite strand	Nucleoside-diphosphate-sugar epimerases
Marinimicrobium agarilyticum	Cellvibrionaceae.1706371	Cellvibrionales.1706369	1.12219e+06	1	fig|1122194.5.peg.2823	fig|1122194.5.peg.2824	opposite strand	Nucleoside-diphosphate-sugar epimerases
Pseudomaricurvus alcaniphilus	Cellvibrionaceae.1706371	Cellvibrionales.1706369	1.16648e+06	1	fig|1166482.3.peg.4494	fig|1166482.3.peg.4493	opposite strand	Alkyl hydroperoxide reductase protein C (EC 1.11.1.15)
Teredinibacter turnerae	Cellvibrionaceae.1706371	Cellvibrionales.1706369	1.3133e+06	1	fig|1313298.4.peg.736	fig|1313298.4.peg.737	opposite strand	2-phosphosulfolactate phosphatase
Marinagarivorans algicola	Cellvibrionaceae.1706371	Cellvibrionales.1706369	1.51327e+06	1	fig|1513270.6.peg.1897	fig|1513270.6.peg.1896	opposite strand	hypothetical protein
Cellvibrio japonicus	Cellvibrionaceae.1706371	Cellvibrionales.1706369	155078	1	fig|155077.6.peg.3586	fig|155077.6.peg.3587	opposite strand	Nucleoside-diphosphate-sugar epimerases
Agaribacterium haliotis	Cellvibrionaceae.1706371	Cellvibrionales.1706369	2.01387e+06	1	fig|2013869.3.peg.2522	fig|2013869.3.peg.2523	opposite strand	hypothetical protein
Saccharophagus degradans	Cellvibrionaceae.1706371	Cellvibrionales.1706369	203122	1	fig|203122.15.peg.3993	fig|203122.15.peg.3994	opposite strand	Nucleoside-diphosphate-sugar epimerases
Marinimicrobium koreense	Cellvibrionaceae.1706371	Cellvibrionales.1706369	306545	1	fig|306545.3.peg.2260	fig|306545.3.peg.2261	opposite strand	Nucleoside-diphosphate-sugar epimerases
Umboniibacter marinipuniceus	Cellvibrionaceae.1706371	Cellvibrionales.1706369	569599	1	fig|569599.3.peg.12	fig|569599.3.peg.13	opposite strand	Nucleoside-diphosphate-sugar epimerases
Pseudoteredinibacter isoporae	Cellvibrionaceae.1706371	Cellvibrionales.1706369	570281	1	fig|570281.4.peg.3822	fig|570281.4.peg.3821	opposite strand	Nucleoside-diphosphate-sugar epimerases
Gilvimarinus agarilyticus	Cellvibrionaceae.1706371	Cellvibrionales.1706369	679260	1	fig|679259.5.peg.313	fig|679259.5.peg.312	opposite strand	Nucleoside-diphosphate-sugar epimerases
Gilvimarinus polysaccharolyticus	Cellvibrionaceae.1706371	Cellvibrionales.1706369	863922	1	fig|863921.7.peg.2538	fig|863921.7.peg.2539	opposite strand	Nucleoside-diphosphate-sugar epimerases
Chromatocurvus halotolerans	Halieaceae.1706372	Cellvibrionales.1706369	1.13203e+06	1	fig|1132028.5.peg.683	fig|1132028.5.peg.682	opposite strand	hypothetical protein
Parahaliea aestuarii	Halieaceae.1706372	Cellvibrionales.1706369	1.85202e+06	1	fig|1852021.5.peg.2116	fig|1852021.5.peg.2115	opposite strand	Alkyl hydroperoxide reductase protein C (EC 1.11.1.15)
Congregibacter litoralis	Halieaceae.1706372	Cellvibrionales.1706369	314285	1	fig|314285.4.peg.2849	fig|314285.4.peg.2850	opposite strand	hypothetical protein
Parahaliea mediterranea	Halieaceae.1706372	Cellvibrionales.1706369	651086	1	fig|651086.3.peg.3351	fig|651086.3.peg.3350	opposite strand	Alkyl hydroperoxide reductase protein C (EC 1.11.1.15)
Halioglobus lutimaris	Halieaceae.1706372	Cellvibrionales.1706369	1.73706e+06	1	fig|1737061.3.peg.442	fig|1737061.3.peg.443	same strand	RidA/YER057c/UK114 superfamily protein
Halioglobus pacificus	Halieaceae.1706372	Cellvibrionales.1706369	930807	1	fig|930806.6.peg.1734	fig|930806.6.peg.1735	same strand	RidA/YER057c/UK114 superfamily protein
Microbulbifer variabilis	Microbulbiferaceae.1706373	Cellvibrionales.1706369	1.27902e+06	1	fig|1279017.3.peg.2900	fig|1279017.3.peg.2903	opposite strand	Nucleoside-diphosphate-sugar epimerases
Microbulbifer thermotolerans	Microbulbiferaceae.1706373	Cellvibrionales.1706369	252515	1	fig|252514.7.peg.3419	fig|252514.7.peg.3417	opposite strand	Nucleoside-diphosphate-sugar epimerases
Microbulbifer agarilyticus	Microbulbiferaceae.1706373	Cellvibrionales.1706369	260552	1	fig|260552.3.peg.3563	fig|260552.3.peg.3561	opposite strand	Nucleoside-diphosphate-sugar epimerases
Microbulbifer pacificus	Microbulbiferaceae.1706373	Cellvibrionales.1706369	407164	1	fig|407164.3.peg.1525	fig|407164.3.peg.1523	opposite strand	Nucleoside-diphosphate-sugar epimerases
Microbulbifer hydrolyticus	Microbulbiferaceae.1706373	Cellvibrionales.1706369	48074.3	1	fig|48074.3.peg.89	fig|48074.3.peg.91	opposite strand	Nucleoside-diphosphate-sugar epimerases
Microbulbifer donghaiensis	Microbulbiferaceae.1706373	Cellvibrionales.1706369	494016	1	fig|494016.4.peg.2617	fig|494016.4.peg.2615	opposite strand	Nucleoside-diphosphate-sugar epimerases
Microbulbifer marinus	Microbulbiferaceae.1706373	Cellvibrionales.1706369	658218	1	fig|658218.4.peg.3110	fig|658218.4.peg.3108	opposite strand	Nucleoside-diphosphate-sugar epimerases
Microbulbifer yueqingensis	Microbulbiferaceae.1706373	Cellvibrionales.1706369	658219	1	fig|658219.4.peg.1493	fig|658219.4.peg.1491	opposite strand	Nucleoside-diphosphate-sugar epimerases
Microbulbifer mangrovi	Microbulbiferaceae.1706373	Cellvibrionales.1706369	927787	1	fig|927787.3.peg.3725	fig|927787.3.peg.3723	opposite strand	Nucleoside-diphosphate-sugar epimerases
Porticoccus hydrocarbonoclasticus	Porticoccaceae.1706374	Cellvibrionales.1706369	1.41578e+06	1	fig|1415778.3.peg.652	fig|1415778.3.peg.653	opposite strand	Nucleoside-diphosphate-sugar epimerases
Dasania marina	Spongiibacteraceae.1706375	Cellvibrionales.1706369	1.12137e+06	1	fig|1121374.3.peg.553	fig|1121374.3.peg.552	opposite strand	Nucleoside-diphosphate-sugar epimerases
Oceanicoccus sagamiensis	Spongiibacteraceae.1706375	Cellvibrionales.1706369	716816	1	fig|716816.3.peg.1827	fig|716816.3.peg.1828	opposite strand	Nucleoside-diphosphate-sugar epimerases
Sinobacterium caligoides	Spongiibacteraceae.1706375	Cellvibrionales.1706369	933926	1	fig|933926.3.peg.826	fig|933926.3.peg.827	opposite strand	Alkyl hydroperoxide reductase protein C (EC 1.11.1.15)
Marichromatium gracile	Chromatiaceae.1046	Chromatiales.135613	1048.21	1	fig|1048.21.peg.1874	fig|1048.21.peg.1875	opposite strand	Chaperone protein ClpB (ATP-dependent unfoldase)
Thiobaca trueperi	Chromatiaceae.1046	Chromatiales.135613	127458	1	fig|127458.4.peg.18	fig|127458.4.peg.19	opposite strand	hypothetical protein
Allochromatium palmeri	Chromatiaceae.1046	Chromatiales.135613	231048	1	fig|231048.4.peg.1485	fig|231048.4.peg.1486	opposite strand	Chaperone protein ClpB (ATP-dependent unfoldase)
Thermochromatium tepidum	Chromatiaceae.1046	Chromatiales.135613	316276	1	fig|316276.3.peg.652	fig|316276.3.peg.653	opposite strand	Chaperone protein ClpB (ATP-dependent unfoldase)
Marichromatium bheemlicum	Chromatiaceae.1046	Chromatiales.135613	365339	1	fig|365339.3.peg.2529	fig|365339.3.peg.2528	opposite strand	Chaperone protein ClpB (ATP-dependent unfoldase)
Thiorhodococcus minor	Chromatiaceae.1046	Chromatiales.135613	57489.4	1	fig|57489.4.peg.2108	fig|57489.4.peg.2110	opposite strand	Chaperone protein ClpB (ATP-dependent unfoldase)
Thiosymbion oneisti	Chromatiaceae.1046	Chromatiales.135613	589555	1	fig|589554.6.peg.1669	fig|589554.6.peg.1672	opposite strand	Uncharacterized protein YfgD, not an arsenate reductase
Allochromatium warmingii	Chromatiaceae.1046	Chromatiales.135613	61595.4	1	fig|61595.4.peg.1026	fig|61595.4.peg.1027	opposite strand	D-glycero-beta-D-manno-heptose 1-phosphate adenylyltransferase (EC 2.7.7.70) / D-glycero-beta-D-manno-heptose-7-phosphate kinase (EC 2.7.1.167)
Thiocapsa rosea	Chromatiaceae.1046	Chromatiales.135613	69360.3	1	fig|69360.3.peg.3909	fig|69360.3.peg.3910	opposite strand	Chaperone protein ClpB (ATP-dependent unfoldase)
Lamprocystis purpurea	Chromatiaceae.1046	Chromatiales.135613	765909	1	fig|765909.3.peg.3368	fig|765909.3.peg.3367	opposite strand	Chemotaxis protein CheD
Marichromatium purpuratum	Chromatiaceae.1046	Chromatiales.135613	765910	1	fig|765910.4.peg.1839	fig|765910.4.peg.1838	opposite strand	Chaperone protein ClpB (ATP-dependent unfoldase)
Thiocystis violascens	Chromatiaceae.1046	Chromatiales.135613	765911	1	fig|765911.20.peg.1314	fig|765911.20.peg.1313	opposite strand	hypothetical protein
Thiorhodococcus drewsii	Chromatiaceae.1046	Chromatiales.135613	765913	1	fig|765913.3.peg.1446	fig|765913.3.peg.1447	opposite strand	Chaperone protein ClpB (ATP-dependent unfoldase)
Thiosymbion ectosymbiont	Chromatiaceae.1046	Chromatiales.135613	2.69649e+06	1	fig|2696485.3.peg.2675	fig|2696485.3.peg.2676	same strand	Sugar fermentation stimulation protein SfsA
Thiohalocapsa marina	Chromatiaceae.1046	Chromatiales.135613	424902	1	fig|424902.4.peg.597	fig|424902.4.peg.596	same strand	1,4-alpha-glucan (glycogen) branching enzyme, GH-13-type (EC 2.4.1.18)
Allochromatium vinosum	Chromatiaceae.1046	Chromatiales.135613	572477	1	fig|572477.4.peg.1765	fig|572477.4.peg.1764	same strand	Hydrolase, alpha/beta fold family
Thioflavicoccus mobilis	Chromatiaceae.1046	Chromatiales.135613	765912	1	fig|765912.4.peg.1098	fig|765912.4.peg.1099	same strand	FIG003737: Predicted deacylase
Thiocapsa marina	Chromatiaceae.1046	Chromatiales.135613	768671	1	fig|768671.3.peg.4126	fig|768671.3.peg.4125	same strand	hypothetical protein
Thiohalobacter thiocyanaticus	Chromatiales incertae sedis.451214	Chromatiales.135613	585456	1	fig|585455.5.peg.792	fig|585455.5.peg.791	same strand	MBL-fold metallo-hydrolase superfamily
Thioalkalivibrio paradoxus	Ectothiorhodospiraceae.72276	Chromatiales.135613	108010	1	fig|108010.3.peg.644	fig|108010.3.peg.642	opposite strand	Inositol-1-monophosphatase (EC 3.1.3.25)
Thioalkalivibrio nitratireducens	Ectothiorhodospiraceae.72276	Chromatiales.135613	1.25504e+06	1	fig|1255043.3.peg.254	fig|1255043.3.peg.252	opposite strand	Inositol-1-monophosphatase (EC 3.1.3.25)
Thioalkalivibrio thiocyanoxidans	Ectothiorhodospiraceae.72276	Chromatiales.135613	1.27902e+06	1	fig|1279019.3.peg.772	fig|1279019.3.peg.774	opposite strand	Inositol-1-monophosphatase (EC 3.1.3.25)
Halorhodospira halochloris	Ectothiorhodospiraceae.72276	Chromatiales.135613	1.35479e+06	1	fig|1354791.3.peg.1966	fig|1354791.3.peg.1964	opposite strand	hypothetical protein
Ectothiorhodospira marina	Ectothiorhodospiraceae.72276	Chromatiales.135613	1.39682e+06	1	fig|1396821.4.peg.1345	fig|1396821.4.peg.1343	opposite strand	hypothetical protein
Thiogranum longum	Ectothiorhodospiraceae.72276	Chromatiales.135613	1.53752e+06	1	fig|1537524.3.peg.1413	fig|1537524.3.peg.1414	opposite strand	Cytochrome c551 peroxidase (EC 1.11.1.5)
Acidihalobacter ferrooxidans	Ectothiorhodospiraceae.72276	Chromatiales.135613	1.76597e+06	1	fig|1765967.4.peg.2362	fig|1765967.4.peg.2360	opposite strand	Amidases related to nicotinamidase
Ectothiorhodospira mobilis	Ectothiorhodospiraceae.72276	Chromatiales.135613	195064	1	fig|195064.5.peg.2110	fig|195064.5.peg.2108	opposite strand	hypothetical protein
Macondimonas diazotrophica	Ectothiorhodospiraceae.72276	Chromatiales.135613	2.30525e+06	1	fig|2305248.6.peg.2560	fig|2305248.6.peg.2562	opposite strand	Alkyl hydroperoxide reductase protein C (EC 1.11.1.15)
Thioalkalivibrio halophilus	Ectothiorhodospiraceae.72276	Chromatiales.135613	252474	1	fig|252474.3.peg.302	fig|252474.3.peg.300	opposite strand	Inositol-1-monophosphatase (EC 3.1.3.25)
Thioalkalivibrio sulfidophilus	Ectothiorhodospiraceae.72276	Chromatiales.135613	396588	1	fig|396588.4.peg.671	fig|396588.4.peg.670	opposite strand	TonB-dependent receptor
Ectothiorhodospira haloalkaliphila	Ectothiorhodospiraceae.72276	Chromatiales.135613	765874	1	fig|765873.5.peg.1540	fig|765873.5.peg.1541	opposite strand	hypothetical protein
Thioalkalivibrio denitrificans	Ectothiorhodospiraceae.72276	Chromatiales.135613	108003	1	fig|108003.3.peg.3238	fig|108003.3.peg.3236	same strand	Efflux ABC transporter, permease/ATP-binding protein
Arhodomonas aquaeolei	Ectothiorhodospiraceae.72276	Chromatiales.135613	1.12102e+06	1	fig|1121016.3.peg.2268	fig|1121016.3.peg.2267	same strand	Two-component transcriptional response regulator, LuxR family
Oceanococcus atlanticus	Ectothiorhodospiraceae.72276	Chromatiales.135613	1.31712e+06	1	fig|1317117.6.peg.3014	fig|1317117.6.peg.3015	same strand	Coproporphyrinogen III oxidase, aerobic (EC 1.3.3.3)
Acidihalobacter prosperus	Ectothiorhodospiraceae.72276	Chromatiales.135613	160660	1	fig|160660.10.peg.2421	fig|160660.10.peg.2420	same strand	hypothetical protein
Halofilum ochraceum	Ectothiorhodospiraceae.72276	Chromatiales.135613	1.61132e+06	1	fig|1611323.5.peg.2249	fig|1611323.5.peg.2250	same strand	hypothetical protein
Aquisalimonas asiatica	Ectothiorhodospiraceae.72276	Chromatiales.135613	406101	1	fig|406100.9.peg.723	fig|406100.9.peg.725	same strand	Glutamine--fructose-6-phosphate aminotransferase [isomerizing] (EC 2.6.1.16)
Thiohalomonas denitrificans	Ectothiorhodospiraceae.72276	Chromatiales.135613	415747	1	fig|415747.11.peg.1668	fig|415747.11.peg.1667	same strand	diguanylate cyclase/phosphodiesterase (GGDEF & EAL domains) with PAS/PAC sensor(s)
Thioalbus denitrificans	Ectothiorhodospiraceae.72276	Chromatiales.135613	547122	1	fig|547122.3.peg.1877	fig|547122.3.peg.1876	same strand	hypothetical protein
Thiorhodospira sibirica	Ectothiorhodospiraceae.72276	Chromatiales.135613	765914	1	fig|765914.3.peg.1292	fig|765914.3.peg.1290	same strand	Biosynthetic arginine decarboxylase (EC 4.1.1.19)
Alkalispirillum mobile	Ectothiorhodospiraceae.72276	Chromatiales.135613	85925.3	1	fig|85925.3.peg.2579	fig|85925.3.peg.2580	same strand	Glutamine--fructose-6-phosphate aminotransferase [isomerizing] (EC 2.6.1.16)
Sulfuriflexus mobilis	Granulosicoccaceae.449719	Chromatiales.135613	1.81181e+06	1	fig|1811807.4.peg.1086	fig|1811807.4.peg.1087	same strand	Flagellar motor rotation protein MotB
Halothiobacillus neapolitanus	Halothiobacillaceae.255526	Chromatiales.135613	555778	1	fig|555778.5.peg.2406	fig|555778.5.peg.2407	opposite strand	Thioredoxin
Thiolapillus brandeum	Sedimenticolaceae.3067276	Chromatiales.135613	1.07659e+06	1	fig|1076588.3.peg.2325	fig|1076588.3.peg.2326	same strand	TRAP-type C4-dicarboxylate transport system, large permease component
Guyparkeria halophila	Thioalkalibacteraceae.2035710	Chromatiales.135613	47960.3	1	fig|47960.3.peg.2363	fig|47960.3.peg.2364	opposite strand	Thioredoxin
Sulfurivermis fontis	Thioalkalispiraceae.1096778	Chromatiales.135613	1.97207e+06	1	fig|1972068.3.peg.3089	fig|1972068.3.peg.3090	opposite strand	Alkyl hydroperoxide reductase subunit C-like protein
Thiohalophilus thiocyanatoxydans	Thioalkalispiraceae.1096778	Chromatiales.135613	381308	1	fig|381308.3.peg.371	fig|381308.3.peg.370	opposite strand	Phosphoglycerate mutase (EC 5.4.2.11)
Wenzhouxiangella marina	Wenzhouxiangellaceae.1676141	Chromatiales.135613	1.57998e+06	1	fig|1579979.7.peg.1794	fig|1579979.7.peg.1793	opposite strand	Alkyl hydroperoxide reductase protein C (EC 1.11.1.15)
Wenzhouxiangella sediminis	Wenzhouxiangellaceae.1676141	Chromatiales.135613	1.79284e+06	1	fig|1792836.3.peg.2558	fig|1792836.3.peg.2557	opposite strand	Alkyl hydroperoxide reductase protein C (EC 1.11.1.15)
Woeseia oceani	Woeseiaceae.1738654	Chromatiales.135613	1.54855e+06	1	fig|1548547.3.peg.1016	fig|1548547.3.peg.1018	opposite strand	Hybrid peroxiredoxin hyPrx5 (EC 1.11.1.15)
Sodalis-like endosymbiont	Bruguierivoracaceae.2812006	Enterobacterales.91347	1.46273e+06	1	fig|1462730.3.peg.206	fig|1462730.3.peg.205	opposite strand	Hybrid peroxiredoxin hyPrx5 (EC 1.11.1.15)
Leminorella grimontii	Budviciaceae.1903416	Enterobacterales.91347	1.006e+06	1	fig|1005999.13.peg.3854	fig|1005999.13.peg.3855	opposite strand	Hybrid peroxiredoxin hyPrx5 (EC 1.11.1.15)
Budvicia diplopodorum	Budviciaceae.1903416	Enterobacterales.91347	1.11906e+06	1	fig|1119056.3.peg.406	fig|1119056.3.peg.407	opposite strand	Hybrid peroxiredoxin hyPrx5 (EC 1.11.1.15)
Pragia fontium	Budviciaceae.1903416	Enterobacterales.91347	1.12298e+06	1	fig|1122977.4.peg.3352	fig|1122977.4.peg.3351	opposite strand	Hybrid peroxiredoxin hyPrx5 (EC 1.11.1.15)
Leminorella richardii	Budviciaceae.1903416	Enterobacterales.91347	158841	1	fig|158841.4.peg.3417	fig|158841.4.peg.3418	opposite strand	Hybrid peroxiredoxin hyPrx5 (EC 1.11.1.15)
Budvicia aquatica	Budviciaceae.1903416	Enterobacterales.91347	82979.4	1	fig|82979.4.peg.918	fig|82979.4.peg.917	opposite strand	Hybrid peroxiredoxin hyPrx5 (EC 1.11.1.15)
Plesiomonas shigelloides	Enterobacterales incertae sedis.451511	Enterobacterales.91347	1.31598e+06	1	fig|1315976.3.peg.3114	fig|1315976.3.peg.3115	opposite strand	Hybrid peroxiredoxin hyPrx5 (EC 1.11.1.15)
Tatumella ptyseos	Erwiniaceae.1903409	Enterobacterales.91347	1.006e+06	1	fig|1005995.3.peg.3446	fig|1005995.3.peg.3445	opposite strand	Hybrid peroxiredoxin hyPrx5 (EC 1.11.1.15)
Erwinia piriflorinigrans	Erwiniaceae.1903409	Enterobacterales.91347	1.16192e+06	1	fig|1161919.3.peg.157	fig|1161919.3.peg.156	opposite strand	Hybrid peroxiredoxin hyPrx5 (EC 1.11.1.15)
Erwinia persicina	Erwiniaceae.1903409	Enterobacterales.91347	1.21936e+06	1	fig|1219360.3.peg.3224	fig|1219360.3.peg.3225	opposite strand	Hybrid peroxiredoxin hyPrx5 (EC 1.11.1.15)
Erwinia toletana	Erwiniaceae.1903409	Enterobacterales.91347	1.27472e+06	1	fig|1274722.3.peg.2849	fig|1274722.3.peg.2848	opposite strand	Hybrid peroxiredoxin hyPrx5 (EC 1.11.1.15)
Pantoea theicola	Erwiniaceae.1903409	Enterobacterales.91347	1.45836e+06	1	fig|1458355.3.peg.3435	fig|1458355.3.peg.3434	opposite strand	Hybrid peroxiredoxin hyPrx5 (EC 1.11.1.15)
Mixta theicola	Erwiniaceae.1903409	Enterobacterales.91347	1.45836e+06	1	fig|1458355.5.peg.4062	fig|1458355.5.peg.4061	opposite strand	Hybrid peroxiredoxin hyPrx5 (EC 1.11.1.15)
Pantoea coffeiphila	Erwiniaceae.1903409	Enterobacterales.91347	1.46564e+06	1	fig|1465635.3.peg.1034	fig|1465635.3.peg.1033	opposite strand	Hybrid peroxiredoxin hyPrx5 (EC 1.11.1.15)
Erwinia iniecta	Erwiniaceae.1903409	Enterobacterales.91347	1.5602e+06	1	fig|1560201.3.peg.3800	fig|1560201.3.peg.3801	opposite strand	Hybrid peroxiredoxin hyPrx5 (EC 1.11.1.15)
Erwinia endophytica	Erwiniaceae.1903409	Enterobacterales.91347	1.56316e+06	1	fig|1563158.3.peg.2070	fig|1563158.3.peg.2071	opposite strand	Hybrid peroxiredoxin hyPrx5 (EC 1.11.1.15)
Mixta intestinalis	Erwiniaceae.1903409	Enterobacterales.91347	1.61549e+06	1	fig|1615494.3.peg.3416	fig|1615494.3.peg.3417	opposite strand	Hybrid peroxiredoxin hyPrx5 (EC 1.11.1.15)
Pantoea alhagi	Erwiniaceae.1903409	Enterobacterales.91347	1.89168e+06	1	fig|1891675.3.peg.1728	fig|1891675.3.peg.1727	opposite strand	Hybrid peroxiredoxin hyPrx5 (EC 1.11.1.15)
Curtobacterium plantarum	Erwiniaceae.1903409	Enterobacterales.91347	221276	1	fig|221276.3.peg.4346	fig|221276.3.peg.4347	opposite strand	Hybrid peroxiredoxin hyPrx5 (EC 1.11.1.15)
Erwinia dacicola	Erwiniaceae.1903409	Enterobacterales.91347	252393	1	fig|252393.30.peg.1016	fig|252393.30.peg.1015	opposite strand	Hybrid peroxiredoxin hyPrx5 (EC 1.11.1.15)
Erwinia typographi	Erwiniaceae.1903409	Enterobacterales.91347	371042	1	fig|371042.3.peg.5366	fig|371042.3.peg.5365	opposite strand	Hybrid peroxiredoxin hyPrx5 (EC 1.11.1.15)
Erwinia tasmaniensis	Erwiniaceae.1903409	Enterobacterales.91347	465818	1	fig|465817.9.peg.182	fig|465817.9.peg.181	opposite strand	Hybrid peroxiredoxin hyPrx5 (EC 1.11.1.15)
Pantoea anthophila	Erwiniaceae.1903409	Enterobacterales.91347	470931	1	fig|470931.3.peg.285	fig|470931.3.peg.286	opposite strand	Hybrid peroxiredoxin hyPrx5 (EC 1.11.1.15)
Pantoea deleyi	Erwiniaceae.1903409	Enterobacterales.91347	470932	1	fig|470932.3.peg.3406	fig|470932.3.peg.3405	opposite strand	Hybrid peroxiredoxin hyPrx5 (EC 1.11.1.15)
Pantoea brenneri	Erwiniaceae.1903409	Enterobacterales.91347	472694	1	fig|472694.3.peg.400	fig|472694.3.peg.399	opposite strand	Hybrid peroxiredoxin hyPrx5 (EC 1.11.1.15)
Pantoea conspicua	Erwiniaceae.1903409	Enterobacterales.91347	472705	1	fig|472705.4.peg.1260	fig|472705.4.peg.1259	opposite strand	Hybrid peroxiredoxin hyPrx5 (EC 1.11.1.15)
Tatumella citrea	Erwiniaceae.1903409	Enterobacterales.91347	53336.8	1	fig|53336.8.peg.4232	fig|53336.8.peg.4233	opposite strand	Hybrid peroxiredoxin hyPrx5 (EC 1.11.1.15)
Erwinia rhapontici	Erwiniaceae.1903409	Enterobacterales.91347	55212.4	1	fig|55212.4.peg.4207	fig|55212.4.peg.4208	opposite strand	Hybrid peroxiredoxin hyPrx5 (EC 1.11.1.15)
Erwinia billingiae	Erwiniaceae.1903409	Enterobacterales.91347	634500	1	fig|634500.5.peg.437	fig|634500.5.peg.436	opposite strand	Hybrid peroxiredoxin hyPrx5 (EC 1.11.1.15)
Tatumella morbirosei	Erwiniaceae.1903409	Enterobacterales.91347	642227	1	fig|642227.3.peg.243	fig|642227.3.peg.244	opposite strand	Hybrid peroxiredoxin hyPrx5 (EC 1.11.1.15)
Erwinia pyrifoliae	Erwiniaceae.1903409	Enterobacterales.91347	644651	1	fig|644651.3.peg.154	fig|644651.3.peg.153	opposite strand	Hybrid peroxiredoxin hyPrx5 (EC 1.11.1.15)
Erwinia amylovora	Erwiniaceae.1903409	Enterobacterales.91347	665029	1	fig|665029.3.peg.169	fig|665029.3.peg.168	opposite strand	Hybrid peroxiredoxin hyPrx5 (EC 1.11.1.15)
Pantoea calida	Erwiniaceae.1903409	Enterobacterales.91347	665913	1	fig|665913.4.peg.4195	fig|665913.4.peg.4196	opposite strand	Hybrid peroxiredoxin hyPrx5 (EC 1.11.1.15)
Mixta calida	Erwiniaceae.1903409	Enterobacterales.91347	665914	1	fig|665913.5.peg.777	fig|665913.5.peg.778	opposite strand	Hybrid peroxiredoxin hyPrx5 (EC 1.11.1.15)
Pantoea gaviniae	Erwiniaceae.1903409	Enterobacterales.91347	665915	1	fig|665914.6.peg.4352	fig|665914.6.peg.4353	opposite strand	Hybrid peroxiredoxin hyPrx5 (EC 1.11.1.15)
Erwinia aphidicola	Erwiniaceae.1903409	Enterobacterales.91347	68334.4	1	fig|68334.4.peg.174	fig|68334.4.peg.175	opposite strand	Hybrid peroxiredoxin hyPrx5 (EC 1.11.1.15)
Pantoea vagans	Erwiniaceae.1903409	Enterobacterales.91347	712898	1	fig|712898.16.peg.3251	fig|712898.16.peg.3252	opposite strand	Hybrid peroxiredoxin hyPrx5 (EC 1.11.1.15)
Erwinia oleae	Erwiniaceae.1903409	Enterobacterales.91347	796334	1	fig|796334.4.peg.279	fig|796334.4.peg.278	opposite strand	Hybrid peroxiredoxin hyPrx5 (EC 1.11.1.15)
Erwinia tracheiphila	Erwiniaceae.1903409	Enterobacterales.91347	1.045e+06	1	fig|1044999.3.peg.2820	fig|1044999.3.peg.2821	same strand	IS1004 transposase
Pantoea rodasii	Erwiniaceae.1903409	Enterobacterales.91347	1.07655e+06	1	fig|1076549.5.peg.1890	fig|1076549.5.peg.1891	same strand	Argininosuccinate lyase (EC 4.3.2.1)
Pantoea rwandensis	Erwiniaceae.1903409	Enterobacterales.91347	1.07655e+06	1	fig|1076550.4.peg.3399	fig|1076550.4.peg.3400	same strand	Argininosuccinate lyase (EC 4.3.2.1)
Pantoea wallisii	Erwiniaceae.1903409	Enterobacterales.91347	1.07655e+06	1	fig|1076551.3.peg.746	fig|1076551.3.peg.747	same strand	hypothetical protein
Pantoea agglomerans	Erwiniaceae.1903409	Enterobacterales.91347	1.26113e+06	1	fig|1261128.3.peg.1811	fig|1261128.3.peg.1813	same strand	Argininosuccinate lyase (EC 4.3.2.1)
Pantoea dispersa	Erwiniaceae.1903409	Enterobacterales.91347	1.44006e+06	1	fig|1440057.5.peg.101	fig|1440057.5.peg.102	same strand	hypothetical protein
Pantoea sesami	Erwiniaceae.1903409	Enterobacterales.91347	1.88111e+06	1	fig|1881110.4.peg.4525	fig|1881110.4.peg.4524	same strand	Argininosuccinate lyase (EC 4.3.2.1)
Pantoea eucalypti	Erwiniaceae.1903409	Enterobacterales.91347	470933	1	fig|470933.11.peg.193	fig|470933.11.peg.191	same strand	Argininosuccinate lyase (EC 4.3.2.1)
Pantoea eucrina	Erwiniaceae.1903409	Enterobacterales.91347	472694	1	fig|472693.6.peg.2280	fig|472693.6.peg.2282	same strand	Argininosuccinate lyase (EC 4.3.2.1)
Pantoea septica	Erwiniaceae.1903409	Enterobacterales.91347	472695	1	fig|472695.24.peg.474	fig|472695.24.peg.475	same strand	Argininosuccinate lyase (EC 4.3.2.1)
Pantoea cypripedii	Erwiniaceae.1903409	Enterobacterales.91347	55209.3	1	fig|55209.3.peg.4135	fig|55209.3.peg.4136	same strand	Argininosuccinate lyase (EC 4.3.2.1)
Pantoea allii	Erwiniaceae.1903409	Enterobacterales.91347	574097	1	fig|574096.8.peg.4578	fig|574096.8.peg.4580	same strand	Argininosuccinate lyase (EC 4.3.2.1)
Pantoea stewartii	Erwiniaceae.1903409	Enterobacterales.91347	66269.3	1	fig|66269.3.peg.3780	fig|66269.3.peg.3781	same strand	Argininosuccinate lyase (EC 4.3.2.1)
Erwinia mallotivora	Erwiniaceae.1903409	Enterobacterales.91347	69222.5	1	fig|69222.5.peg.1244	fig|69222.5.peg.1243	same strand	Argininosuccinate lyase (EC 4.3.2.1)
Erwinia psidii	Erwiniaceae.1903409	Enterobacterales.91347	69224.3	1	fig|69224.3.peg.1185	fig|69224.3.peg.1187	same strand	Argininosuccinate lyase (EC 4.3.2.1)
Pantoea ananatis	Erwiniaceae.1903409	Enterobacterales.91347	932677	1	fig|932677.3.peg.3548	fig|932677.3.peg.3549	same strand	Argininosuccinate lyase (EC 4.3.2.1)
Edwardsiella hoshinae	Hafniaceae.1903412	Enterobacterales.91347	1.21697e+06	1	fig|1216966.6.peg.2974	fig|1216966.6.peg.2975	opposite strand	Hybrid peroxiredoxin hyPrx5 (EC 1.11.1.15)
Edwardsiella piscicida	Hafniaceae.1903412	Enterobacterales.91347	1.26355e+06	1	fig|1263550.7.peg.11	fig|1263550.7.peg.12	opposite strand	Hybrid peroxiredoxin hyPrx5 (EC 1.11.1.15)
Hafnia paralvei	Hafniaceae.1903412	Enterobacterales.91347	1.35426e+06	1	fig|1354263.4.peg.4187	fig|1354263.4.peg.4188	opposite strand	Hybrid peroxiredoxin hyPrx5 (EC 1.11.1.15)
Obesumbacterium proteus	Hafniaceae.1903412	Enterobacterales.91347	1.35427e+06	1	fig|1354268.4.peg.2917	fig|1354268.4.peg.2916	opposite strand	Hybrid peroxiredoxin hyPrx5 (EC 1.11.1.15)
Edwardsiella anguillarum	Hafniaceae.1903412	Enterobacterales.91347	1.82196e+06	1	fig|1821960.5.peg.629	fig|1821960.5.peg.628	opposite strand	Hybrid peroxiredoxin hyPrx5 (EC 1.11.1.15)
Hafnia alvei	Hafniaceae.1903412	Enterobacterales.91347	569.3	1	fig|569.30.peg.1820	fig|569.30.peg.1819	opposite strand	Hybrid peroxiredoxin hyPrx5 (EC 1.11.1.15)
Edwardsiella ictaluri	Hafniaceae.1903412	Enterobacterales.91347	634503	1	fig|634503.3.peg.3427	fig|634503.3.peg.3428	opposite strand	Hybrid peroxiredoxin hyPrx5 (EC 1.11.1.15)
Edwardsiella tarda	Hafniaceae.1903412	Enterobacterales.91347	667120	1	fig|667120.5.peg.3806	fig|667120.5.peg.3805	opposite strand	Hybrid peroxiredoxin hyPrx5 (EC 1.11.1.15)
Arsenophonus nasoniae	Morganellaceae.1903414	Enterobacterales.91347	1.12102e+06	1	fig|1121018.3.peg.2560	fig|1121018.3.peg.2561	opposite strand	N-acetylornithine deacetylase (EC 3.5.1.16)
Arsenophonus endosymbiont	Morganellaceae.1903414	Enterobacterales.91347	1.24702e+06	1	fig|1247024.4.peg.1748	fig|1247024.4.peg.1747	opposite strand	N-acetylornithine deacetylase (EC 3.5.1.16)
Xenorhabdus poinarii	Morganellaceae.1903414	Enterobacterales.91347	1.3543e+06	1	fig|1354304.4.peg.3665	fig|1354304.4.peg.3666	opposite strand	hypothetical protein
Providencia rustigianii	Morganellaceae.1903414	Enterobacterales.91347	158851	1	fig|158850.7.peg.3494	fig|158850.7.peg.3497	opposite strand	hypothetical protein
Providencia vermicola	Morganellaceae.1903414	Enterobacterales.91347	333965	1	fig|333965.11.peg.3915	fig|333965.11.peg.3918	opposite strand	hypothetical protein
Arsenophonus triatominarum	Morganellaceae.1903414	Enterobacterales.91347	57911.3	1	fig|57911.3.peg.975	fig|57911.3.peg.974	opposite strand	N-acetylornithine deacetylase (EC 3.5.1.16)
Providencia rettgeri	Morganellaceae.1903414	Enterobacterales.91347	587.21	1	fig|587.21.peg.577	fig|587.21.peg.574	opposite strand	hypothetical protein
Photorhabdus khanii	Morganellaceae.1903414	Enterobacterales.91347	1.00415e+06	1	fig|1004150.3.peg.5033	fig|1004150.3.peg.5034	same strand	Argininosuccinate lyase (EC 4.3.2.1)
Photorhabdus temperata	Morganellaceae.1903414	Enterobacterales.91347	1.00415e+06	1	fig|1004151.3.peg.1746	fig|1004151.3.peg.1745	same strand	Argininosuccinate lyase (EC 4.3.2.1)
Photorhabdus tasmaniensis	Morganellaceae.1903414	Enterobacterales.91347	1.00416e+06	1	fig|1004159.3.peg.4853	fig|1004159.3.peg.4852	same strand	Argininosuccinate lyase (EC 4.3.2.1)
Photorhabdus stackebrandtii	Morganellaceae.1903414	Enterobacterales.91347	1.12304e+06	1	fig|1123042.3.peg.1927	fig|1123042.3.peg.1926	same strand	Argininosuccinate lyase (EC 4.3.2.1)
Providencia burhodogranariea	Morganellaceae.1903414	Enterobacterales.91347	1.14166e+06	1	fig|1141662.3.peg.3608	fig|1141662.3.peg.3609	same strand	Argininosuccinate lyase (EC 4.3.2.1)
Providencia alcalifaciens	Morganellaceae.1903414	Enterobacterales.91347	1.25699e+06	1	fig|1256993.3.peg.1460	fig|1256993.3.peg.1458	same strand	Argininosuccinate lyase (EC 4.3.2.1)
Moellerella wisconsensis	Morganellaceae.1903414	Enterobacterales.91347	1.35427e+06	1	fig|1354267.4.peg.503	fig|1354267.4.peg.504	same strand	Argininosuccinate lyase (EC 4.3.2.1)
Proteus hauseri	Morganellaceae.1903414	Enterobacterales.91347	1.35427e+06	1	fig|1354271.4.peg.451	fig|1354271.4.peg.450	same strand	Argininosuccinate lyase (EC 4.3.2.1)
Providencia heimbachae	Morganellaceae.1903414	Enterobacterales.91347	1.35427e+06	1	fig|1354272.4.peg.2012	fig|1354272.4.peg.2015	same strand	Argininosuccinate lyase (EC 4.3.2.1)
Xenorhabdus bovienii	Morganellaceae.1903414	Enterobacterales.91347	1.39785e+06	1	fig|1397852.3.peg.3514	fig|1397852.3.peg.3516	same strand	Argininosuccinate lyase (EC 4.3.2.1)
Xenorhabdus nematophila	Morganellaceae.1903414	Enterobacterales.91347	1.43782e+06	1	fig|1437823.3.peg.267	fig|1437823.3.peg.266	same strand	Argininosuccinate lyase (EC 4.3.2.1)
Proteus terrae	Morganellaceae.1903414	Enterobacterales.91347	1.57416e+06	1	fig|1574161.3.peg.3433	fig|1574161.3.peg.3434	same strand	Argininosuccinate lyase (EC 4.3.2.1)
Proteus columbae	Morganellaceae.1903414	Enterobacterales.91347	1.98758e+06	1	fig|1987580.7.peg.109	fig|1987580.7.peg.108	same strand	Argininosuccinate lyase (EC 4.3.2.1)
Photorhabdus bodei	Morganellaceae.1903414	Enterobacterales.91347	2.02968e+06	1	fig|2029681.3.peg.4395	fig|2029681.3.peg.4396	same strand	Argininosuccinate lyase (EC 4.3.2.1)
Photorhabdus laumondii	Morganellaceae.1903414	Enterobacterales.91347	2.02969e+06	1	fig|2029685.3.peg.1776	fig|2029685.3.peg.1777	same strand	Argininosuccinate lyase (EC 4.3.2.1)
Photorhabdus kayaii	Morganellaceae.1903414	Enterobacterales.91347	230088	1	fig|230088.3.peg.3108	fig|230088.3.peg.3109	same strand	Argininosuccinate lyase (EC 4.3.2.1)
Photorhabdus luminescens	Morganellaceae.1903414	Enterobacterales.91347	243266	1	fig|243265.5.peg.5359	fig|243265.5.peg.5360	same strand	Argininosuccinate lyase (EC 4.3.2.1)
Xenorhabdus innexi	Morganellaceae.1903414	Enterobacterales.91347	290110	1	fig|290109.7.peg.2726	fig|290109.7.peg.2725	same strand	Argininosuccinate lyase (EC 4.3.2.1)
Xenorhabdus budapestensis	Morganellaceae.1903414	Enterobacterales.91347	290111	1	fig|290110.6.peg.1256	fig|290110.6.peg.1255	same strand	Argininosuccinate lyase (EC 4.3.2.1)
Xenorhabdus ehlersii	Morganellaceae.1903414	Enterobacterales.91347	290112	1	fig|290111.6.peg.1065	fig|290111.6.peg.1066	same strand	Argininosuccinate lyase (EC 4.3.2.1)
Xenorhabdus szentirmaii	Morganellaceae.1903414	Enterobacterales.91347	290112	1	fig|290112.3.peg.2999	fig|290112.3.peg.3000	same strand	Argininosuccinate lyase (EC 4.3.2.1)
Photorhabdus asymbiotica	Morganellaceae.1903414	Enterobacterales.91347	291112	1	fig|291112.3.peg.4748	fig|291112.3.peg.4749	same strand	Argininosuccinate lyase (EC 4.3.2.1)
Xenorhabdus stockiae	Morganellaceae.1903414	Enterobacterales.91347	351614	1	fig|351614.4.peg.2506	fig|351614.4.peg.2505	same strand	Argininosuccinate lyase (EC 4.3.2.1)
Xenorhabdus koppenhoeferi	Morganellaceae.1903414	Enterobacterales.91347	351659	1	fig|351659.4.peg.2511	fig|351659.4.peg.2510	same strand	Argininosuccinate lyase (EC 4.3.2.1)
Xenorhabdus doucetiae	Morganellaceae.1903414	Enterobacterales.91347	351672	1	fig|351671.8.peg.3731	fig|351671.8.peg.3732	same strand	Mobile element protein
Xenorhabdus griffiniae	Morganellaceae.1903414	Enterobacterales.91347	351672	1	fig|351672.4.peg.2536	fig|351672.4.peg.2537	same strand	Argininosuccinate lyase (EC 4.3.2.1)
Xenorhabdus cabanillasii	Morganellaceae.1903414	Enterobacterales.91347	351673	1	fig|351673.4.peg.198	fig|351673.4.peg.197	same strand	Argininosuccinate lyase (EC 4.3.2.1)
Xenorhabdus mauleonii	Morganellaceae.1903414	Enterobacterales.91347	351676	1	fig|351675.7.peg.3666	fig|351675.7.peg.3665	same strand	Argininosuccinate lyase (EC 4.3.2.1)
Xenorhabdus kozodoii	Morganellaceae.1903414	Enterobacterales.91347	351676	1	fig|351676.4.peg.1083	fig|351676.4.peg.1082	same strand	Argininosuccinate lyase (EC 4.3.2.1)
Xenorhabdus hominickii	Morganellaceae.1903414	Enterobacterales.91347	351680	1	fig|351679.5.peg.3247	fig|351679.5.peg.3248	same strand	Argininosuccinate lyase (EC 4.3.2.1)
Morganella psychrotolerans	Morganellaceae.1903414	Enterobacterales.91347	368603	1	fig|368603.12.peg.3638	fig|368603.12.peg.3639	same strand	L-Proline/Glycine betaine transporter ProP
Xenorhabdus beddingii	Morganellaceae.1903414	Enterobacterales.91347	40578.4	1	fig|40578.4.peg.2382	fig|40578.4.peg.2381	same strand	Argininosuccinate lyase (EC 4.3.2.1)
Photorhabdus cinerea	Morganellaceae.1903414	Enterobacterales.91347	471575	1	fig|471575.3.peg.1788	fig|471575.3.peg.1787	same strand	Argininosuccinate lyase (EC 4.3.2.1)
Providencia stuartii	Morganellaceae.1903414	Enterobacterales.91347	471875	1	fig|471874.6.peg.3268	fig|471874.6.peg.3269	same strand	Transposase
Providencia sneebia	Morganellaceae.1903414	Enterobacterales.91347	516075	1	fig|516075.4.peg.112	fig|516075.4.peg.111	same strand	Argininosuccinate lyase (EC 4.3.2.1)
Proteus mirabilis	Morganellaceae.1903414	Enterobacterales.91347	529508	1	fig|529507.6.peg.3168	fig|529507.6.peg.3167	same strand	Argininosuccinate lyase (EC 4.3.2.1)
Xenorhabdus japonica	Morganellaceae.1903414	Enterobacterales.91347	53341.3	1	fig|53341.3.peg.661	fig|53341.3.peg.660	same strand	Argininosuccinate lyase (EC 4.3.2.1)
Morganella morganii	Morganellaceae.1903414	Enterobacterales.91347	582.13	1	fig|582.13.peg.525	fig|582.13.peg.526	same strand	Argininosuccinate lyase (EC 4.3.2.1)
Proteus vulgaris	Morganellaceae.1903414	Enterobacterales.91347	585.9	1	fig|585.9.peg.600	fig|585.9.peg.601	same strand	Argininosuccinate lyase (EC 4.3.2.1)
Proteus cibarius	Morganellaceae.1903414	Enterobacterales.91347	626775	1	fig|626774.8.peg.108	fig|626774.8.peg.107	same strand	Argininosuccinate lyase (EC 4.3.2.1)
Photorhabdus heterorhabditis	Morganellaceae.1903414	Enterobacterales.91347	880156	1	fig|880156.5.peg.1770	fig|880156.5.peg.1769	same strand	Argininosuccinate lyase (EC 4.3.2.1)
Xenorhabdus khoisanae	Morganellaceae.1903414	Enterobacterales.91347	880157	1	fig|880157.4.peg.425	fig|880157.4.peg.426	same strand	Argininosuccinate lyase (EC 4.3.2.1)
Dickeya chrysanthemi	Pectobacteriaceae.1903410	Enterobacterales.91347	1.22357e+06	1	fig|1223569.8.peg.153	fig|1223569.8.peg.152	opposite strand	Hybrid peroxiredoxin hyPrx5 (EC 1.11.1.15)
Dickeya solani	Pectobacteriaceae.1903410	Enterobacterales.91347	1.22415e+06	1	fig|1224151.10.peg.195	fig|1224151.10.peg.194	opposite strand	Hybrid peroxiredoxin hyPrx5 (EC 1.11.1.15)
Dickeya aquatica	Pectobacteriaceae.1903410	Enterobacterales.91347	1.40109e+06	1	fig|1401087.6.peg.4332	fig|1401087.6.peg.4333	opposite strand	Hybrid peroxiredoxin hyPrx5 (EC 1.11.1.15)
Brenneria roseae	Pectobacteriaceae.1903410	Enterobacterales.91347	1.50851e+06	1	fig|1508507.3.peg.1656	fig|1508507.3.peg.1655	opposite strand	Hybrid peroxiredoxin hyPrx5 (EC 1.11.1.15)
Dickeya fangzhongdai	Pectobacteriaceae.1903410	Enterobacterales.91347	1.77854e+06	1	fig|1778540.38.peg.3036	fig|1778540.38.peg.3037	opposite strand	Hybrid peroxiredoxin hyPrx5 (EC 1.11.1.15)
Sodalis pierantonius	Pectobacteriaceae.1903410	Enterobacterales.91347	2342.5	1	fig|2342.5.peg.2885	fig|2342.5.peg.2884	opposite strand	Hybrid peroxiredoxin hyPrx5 (EC 1.11.1.15)
Brenneria nigrifluens	Pectobacteriaceae.1903410	Enterobacterales.91347	55210.5	1	fig|55210.5.peg.4571	fig|55210.5.peg.4572	opposite strand	glutathione peroxidase
Dickeya zeae	Pectobacteriaceae.1903410	Enterobacterales.91347	561229	1	fig|561229.3.peg.133	fig|561229.3.peg.132	opposite strand	Hybrid peroxiredoxin hyPrx5 (EC 1.11.1.15)
Lonsdalea britannica	Pectobacteriaceae.1903410	Enterobacterales.91347	1.0827e+06	1	fig|1082704.5.peg.908	fig|1082704.5.peg.909	same strand	5,10-methylenetetrahydrofolate reductase (EC 1.5.1.20)
Brenneria goodwinii	Pectobacteriaceae.1903410	Enterobacterales.91347	1.10941e+06	1	fig|1109412.17.peg.3818	fig|1109412.17.peg.3820	same strand	5,10-methylenetetrahydrofolate reductase (EC 1.5.1.20)
Lonsdalea populi	Pectobacteriaceae.1903410	Enterobacterales.91347	1.17257e+06	1	fig|1172565.14.peg.3101	fig|1172565.14.peg.3102	same strand	5,10-methylenetetrahydrofolate reductase (EC 1.5.1.20)
Pectobacterium wasabiae	Pectobacteriaceae.1903410	Enterobacterales.91347	1.17563e+06	1	fig|1175631.8.peg.1423	fig|1175631.8.peg.1425	same strand	5,10-methylenetetrahydrofolate reductase (EC 1.5.1.20)
Dickeya paradisiaca	Pectobacteriaceae.1903410	Enterobacterales.91347	1.22415e+06	1	fig|1224150.8.peg.4275	fig|1224150.8.peg.4277	same strand	5,10-methylenetetrahydrofolate reductase (EC 1.5.1.20)
Dickeya dianthicola	Pectobacteriaceae.1903410	Enterobacterales.91347	1.22634e+06	1	fig|1226343.18.peg.176	fig|1226343.18.peg.173	same strand	5,10-methylenetetrahydrofolate reductase (EC 1.5.1.20)
Pectobacterium carotovorum	Pectobacteriaceae.1903410	Enterobacterales.91347	1.26754e+06	1	fig|1267544.3.peg.4205	fig|1267544.3.peg.4207	same strand	5,10-methylenetetrahydrofolate reductase (EC 1.5.1.20)
Pectobacterium atrosepticum	Pectobacteriaceae.1903410	Enterobacterales.91347	1.28959e+06	1	fig|1289594.3.peg.1678	fig|1289594.3.peg.1677	same strand	5,10-methylenetetrahydrofolate reductase (EC 1.5.1.20)
Samsonia erythrinae	Pectobacteriaceae.1903410	Enterobacterales.91347	160434	1	fig|160434.3.peg.3226	fig|160434.3.peg.3229	same strand	5,10-methylenetetrahydrofolate reductase (EC 1.5.1.20)
Pectobacterium brasiliense	Pectobacteriaceae.1903410	Enterobacterales.91347	180958	1	fig|180957.62.peg.1709	fig|180957.62.peg.1708	same strand	5,10-methylenetetrahydrofolate reductase (EC 1.5.1.20)
Pectobacterium parmentieri	Pectobacteriaceae.1903410	Enterobacterales.91347	1.90573e+06	1	fig|1905730.56.peg.3873	fig|1905730.56.peg.3874	same strand	5,10-methylenetetrahydrofolate reductase (EC 1.5.1.20)
Pectobacterium zantedeschiae	Pectobacteriaceae.1903410	Enterobacterales.91347	2.03477e+06	1	fig|2034769.10.peg.3723	fig|2034769.10.peg.3725	same strand	5,10-methylenetetrahydrofolate reductase (EC 1.5.1.20)
Pectobacterium polaris	Pectobacteriaceae.1903410	Enterobacterales.91347	2.04206e+06	1	fig|2042057.5.peg.1089	fig|2042057.5.peg.1090	same strand	5,10-methylenetetrahydrofolate reductase (EC 1.5.1.20)
Pectobacterium peruviense	Pectobacteriaceae.1903410	Enterobacterales.91347	2.06648e+06	1	fig|2066479.6.peg.1238	fig|2066479.6.peg.1240	same strand	5,10-methylenetetrahydrofolate reductase (EC 1.5.1.20)
Pectobacterium punjabense	Pectobacteriaceae.1903410	Enterobacterales.91347	2.1084e+06	1	fig|2108399.7.peg.184	fig|2108399.7.peg.183	same strand	5,10-methylenetetrahydrofolate reductase (EC 1.5.1.20)
Pectobacterium maceratum	Pectobacteriaceae.1903410	Enterobacterales.91347	2.16365e+06	1	fig|2163650.3.peg.1280	fig|2163650.3.peg.1279	same strand	5,10-methylenetetrahydrofolate reductase (EC 1.5.1.20)
Pectobacterium polonicum	Pectobacteriaceae.1903410	Enterobacterales.91347	2.48512e+06	1	fig|2485124.3.peg.1154	fig|2485124.3.peg.1155	same strand	5,10-methylenetetrahydrofolate reductase (EC 1.5.1.20)
Sodalis glossinidius	Pectobacteriaceae.1903410	Enterobacterales.91347	343509	1	fig|343509.12.peg.5322	fig|343509.12.peg.5323	same strand	Argininosuccinate lyase (EC 4.3.2.1)
Pectobacterium betavasculorum	Pectobacteriaceae.1903410	Enterobacterales.91347	55207.5	1	fig|55207.5.peg.3977	fig|55207.5.peg.3976	same strand	5,10-methylenetetrahydrofolate reductase (EC 1.5.1.20)
Dickeya dadantii	Pectobacteriaceae.1903410	Enterobacterales.91347	579405	1	fig|579405.3.peg.4013	fig|579405.3.peg.4015	same strand	5,10-methylenetetrahydrofolate reductase (EC 1.5.1.20)
Brenneria salicis	Pectobacteriaceae.1903410	Enterobacterales.91347	714315	1	fig|714314.6.peg.1277	fig|714314.6.peg.1278	same strand	5,10-methylenetetrahydrofolate reductase (EC 1.5.1.20)
Brenneria alni	Pectobacteriaceae.1903410	Enterobacterales.91347	71656.4	1	fig|71656.4.peg.1042	fig|71656.4.peg.1044	same strand	5,10-methylenetetrahydrofolate reductase (EC 1.5.1.20)
Pectobacterium odoriferum	Pectobacteriaceae.1903410	Enterobacterales.91347	78398.2	1	fig|78398.23.peg.206	fig|78398.23.peg.205	same strand	5,10-methylenetetrahydrofolate reductase (EC 1.5.1.20)
Yersinia massiliensis	Yersiniaceae.1903411	Enterobacterales.91347	1.20568e+06	1	fig|1205683.4.peg.4141	fig|1205683.4.peg.4142	opposite strand	Hybrid peroxiredoxin hyPrx5 (EC 1.11.1.15)
Serratia grimesii	Yersiniaceae.1903411	Enterobacterales.91347	1.21809e+06	1	fig|1218094.3.peg.4591	fig|1218094.3.peg.4590	opposite strand	Hybrid peroxiredoxin hyPrx5 (EC 1.11.1.15)
Serratia rubidaea	Yersiniaceae.1903411	Enterobacterales.91347	1.2181e+06	1	fig|1218096.3.peg.4256	fig|1218096.3.peg.4257	opposite strand	Hybrid peroxiredoxin hyPrx5 (EC 1.11.1.15)
Yersinia pekkanenii	Yersiniaceae.1903411	Enterobacterales.91347	1.28839e+06	1	fig|1288385.3.peg.3386	fig|1288385.3.peg.3385	opposite strand	Hybrid peroxiredoxin hyPrx5 (EC 1.11.1.15)
Serratia fonticola	Yersiniaceae.1903411	Enterobacterales.91347	1.33207e+06	1	fig|1332071.4.peg.3343	fig|1332071.4.peg.3344	opposite strand	Hybrid peroxiredoxin hyPrx5 (EC 1.11.1.15)
Yersinia wautersii	Yersiniaceae.1903411	Enterobacterales.91347	1.34164e+06	1	fig|1341643.4.peg.4272	fig|1341643.4.peg.4271	opposite strand	Hybrid peroxiredoxin hyPrx5 (EC 1.11.1.15)
Serratia liquefaciens	Yersiniaceae.1903411	Enterobacterales.91347	1.34661e+06	1	fig|1346614.3.peg.4642	fig|1346614.3.peg.4643	opposite strand	Hybrid peroxiredoxin hyPrx5 (EC 1.11.1.15)
Serratia quinivorans	Yersiniaceae.1903411	Enterobacterales.91347	137546	1	fig|137545.7.peg.4719	fig|137545.7.peg.4718	opposite strand	Hybrid peroxiredoxin hyPrx5 (EC 1.11.1.15)
Serratia ficaria	Yersiniaceae.1903411	Enterobacterales.91347	1.41114e+06	1	fig|1411141.3.peg.4328	fig|1411141.3.peg.4329	opposite strand	Hybrid peroxiredoxin hyPrx5 (EC 1.11.1.15)
Serratia nematodiphila	Yersiniaceae.1903411	Enterobacterales.91347	1.44998e+06	1	fig|1449981.6.peg.2328	fig|1449981.6.peg.2329	opposite strand	Hybrid peroxiredoxin hyPrx5 (EC 1.11.1.15)
Yersinia aldovae	Yersiniaceae.1903411	Enterobacterales.91347	1.4535e+06	1	fig|1453495.3.peg.2340	fig|1453495.3.peg.2341	opposite strand	Hybrid peroxiredoxin hyPrx5 (EC 1.11.1.15)
Rahnella victoriana	Yersiniaceae.1903411	Enterobacterales.91347	1.51057e+06	1	fig|1510570.5.peg.3470	fig|1510570.5.peg.3469	opposite strand	Hybrid peroxiredoxin hyPrx5 (EC 1.11.1.15)
Rahnella bruchi	Yersiniaceae.1903411	Enterobacterales.91347	1.51057e+06	1	fig|1510573.3.peg.4248	fig|1510573.3.peg.4249	opposite strand	Hybrid peroxiredoxin hyPrx5 (EC 1.11.1.15)
Rahnella woolbedingensis	Yersiniaceae.1903411	Enterobacterales.91347	1.51057e+06	1	fig|1510574.3.peg.2688	fig|1510574.3.peg.2687	opposite strand	Hybrid peroxiredoxin hyPrx5 (EC 1.11.1.15)
Rouxiella chamberiensis	Yersiniaceae.1903411	Enterobacterales.91347	1.51347e+06	1	fig|1513468.4.peg.196	fig|1513468.4.peg.197	opposite strand	Hybrid peroxiredoxin hyPrx5 (EC 1.11.1.15)
Serratia vespertilionis	Yersiniaceae.1903411	Enterobacterales.91347	1.52143e+06	1	fig|1521428.3.peg.4638	fig|1521428.3.peg.4637	opposite strand	Hybrid peroxiredoxin hyPrx5 (EC 1.11.1.15)
Rouxiella silvae	Yersiniaceae.1903411	Enterobacterales.91347	1.64637e+06	1	fig|1646373.3.peg.3427	fig|1646373.3.peg.3426	opposite strand	Hybrid peroxiredoxin hyPrx5 (EC 1.11.1.15)
Rouxiella badensis	Yersiniaceae.1903411	Enterobacterales.91347	1.64638e+06	1	fig|1646377.3.peg.1571	fig|1646377.3.peg.1570	opposite strand	Hybrid peroxiredoxin hyPrx5 (EC 1.11.1.15)
Serratia oryzae	Yersiniaceae.1903411	Enterobacterales.91347	2.03416e+06	1	fig|2034155.6.peg.154	fig|2034155.6.peg.155	opposite strand	Hybrid peroxiredoxin hyPrx5 (EC 1.11.1.15)
Yersinia hibernica	Yersiniaceae.1903411	Enterobacterales.91347	2.33926e+06	1	fig|2339259.4.peg.4233	fig|2339259.4.peg.4234	opposite strand	Hybrid peroxiredoxin hyPrx5 (EC 1.11.1.15)
Yersinia aleksiciae	Yersiniaceae.1903411	Enterobacterales.91347	263820	1	fig|263819.5.peg.2554	fig|263819.5.peg.2555	opposite strand	Hybrid peroxiredoxin hyPrx5 (EC 1.11.1.15)
Yersinia kristensenii	Yersiniaceae.1903411	Enterobacterales.91347	28152.1	1	fig|28152.12.peg.2617	fig|28152.12.peg.2618	opposite strand	Hybrid peroxiredoxin hyPrx5 (EC 1.11.1.15)
Serratia ureilytica	Yersiniaceae.1903411	Enterobacterales.91347	300182	1	fig|300181.6.peg.2708	fig|300181.6.peg.2709	opposite strand	Hybrid peroxiredoxin hyPrx5 (EC 1.11.1.15)
Yersinia intermedia	Yersiniaceae.1903411	Enterobacterales.91347	349966	1	fig|349965.6.peg.3894	fig|349965.6.peg.3895	opposite strand	Hybrid peroxiredoxin hyPrx5 (EC 1.11.1.15)
Yersinia mollaretii	Yersiniaceae.1903411	Enterobacterales.91347	349967	1	fig|349967.4.peg.3051	fig|349967.4.peg.3050	opposite strand	Hybrid peroxiredoxin hyPrx5 (EC 1.11.1.15)
Yersinia bercovieri	Yersiniaceae.1903411	Enterobacterales.91347	349968	1	fig|349968.5.peg.3369	fig|349968.5.peg.3370	opposite strand	Hybrid peroxiredoxin hyPrx5 (EC 1.11.1.15)
Yersinia similis	Yersiniaceae.1903411	Enterobacterales.91347	367190	1	fig|367190.3.peg.1654	fig|367190.3.peg.1653	opposite strand	Hybrid peroxiredoxin hyPrx5 (EC 1.11.1.15)
Serratia proteamaculans	Yersiniaceae.1903411	Enterobacterales.91347	399742	1	fig|399741.7.peg.4828	fig|399741.7.peg.4829	opposite strand	Hybrid peroxiredoxin hyPrx5 (EC 1.11.1.15)
Ewingella americana	Yersiniaceae.1903411	Enterobacterales.91347	41202.1	1	fig|41202.12.peg.4449	fig|41202.12.peg.4450	opposite strand	Hybrid peroxiredoxin hyPrx5 (EC 1.11.1.15)
Yersinia rohdei	Yersiniaceae.1903411	Enterobacterales.91347	527004	1	fig|527004.3.peg.1613	fig|527004.3.peg.1612	opposite strand	Hybrid peroxiredoxin hyPrx5 (EC 1.11.1.15)
Yersinia ruckeri	Yersiniaceae.1903411	Enterobacterales.91347	527005	1	fig|527005.3.peg.1416	fig|527005.3.peg.1417	opposite strand	Hybrid peroxiredoxin hyPrx5 (EC 1.11.1.15)
Rahnella variigena	Yersiniaceae.1903411	Enterobacterales.91347	574964	1	fig|574964.4.peg.814	fig|574964.4.peg.813	opposite strand	Hybrid peroxiredoxin hyPrx5 (EC 1.11.1.15)
Rahnella inusitata	Yersiniaceae.1903411	Enterobacterales.91347	58169.4	1	fig|58169.4.peg.4066	fig|58169.4.peg.4065	opposite strand	Hybrid peroxiredoxin hyPrx5 (EC 1.11.1.15)
Serratia marcescens	Yersiniaceae.1903411	Enterobacterales.91347	615.995	1	fig|615.995.peg.378	fig|615.995.peg.377	opposite strand	Hybrid peroxiredoxin hyPrx5 (EC 1.11.1.15)
Yersinia enterocolitica	Yersiniaceae.1903411	Enterobacterales.91347	630.274	1	fig|630.274.peg.3931	fig|630.274.peg.3932	opposite strand	Hybrid peroxiredoxin hyPrx5 (EC 1.11.1.15)
Yersinia pestis	Yersiniaceae.1903411	Enterobacterales.91347	632.151	1	fig|632.151.peg.3109	fig|632.151.peg.3110	opposite strand	Hybrid peroxiredoxin hyPrx5 (EC 1.11.1.15)
Yersinia pseudotuberculosis	Yersiniaceae.1903411	Enterobacterales.91347	633.45	1	fig|633.45.peg.189	fig|633.45.peg.190	opposite strand	Hybrid peroxiredoxin hyPrx5 (EC 1.11.1.15)
Serratia odorifera	Yersiniaceae.1903411	Enterobacterales.91347	667129	1	fig|667129.3.peg.421	fig|667129.3.peg.422	opposite strand	Hybrid peroxiredoxin hyPrx5 (EC 1.11.1.15)
Yersinia nurmii	Yersiniaceae.1903411	Enterobacterales.91347	685706	1	fig|685706.3.peg.3528	fig|685706.3.peg.3527	opposite strand	Hybrid peroxiredoxin hyPrx5 (EC 1.11.1.15)
Rahnella aquatilis	Yersiniaceae.1903411	Enterobacterales.91347	745277	1	fig|745277.3.peg.4222	fig|745277.3.peg.4223	opposite strand	Hybrid peroxiredoxin hyPrx5 (EC 1.11.1.15)
Serratia plymuthica	Yersiniaceae.1903411	Enterobacterales.91347	768492	1	fig|768492.3.peg.4850	fig|768492.3.peg.4851	opposite strand	Hybrid peroxiredoxin hyPrx5 (EC 1.11.1.15)
Yersinia entomophaga	Yersiniaceae.1903411	Enterobacterales.91347	935293	1	fig|935293.3.peg.1631	fig|935293.3.peg.1632	opposite strand	Hybrid peroxiredoxin hyPrx5 (EC 1.11.1.15)
Serratia symbiotica	Yersiniaceae.1903411	Enterobacterales.91347	138074	1	fig|138074.4.peg.925	fig|138074.4.peg.926	same strand	Argininosuccinate lyase (EC 4.3.2.1)
Plasticicumulans lactativorans		Gammaproteobacteria incertae sedis.118884	1.13311e+06	1	fig|1133106.8.peg.1488	fig|1133106.8.peg.1487	opposite strand	Isocitrate dehydrogenase [NADP] (EC 1.1.1.42)
Contendobacter odensis		Gammaproteobacteria incertae sedis.118884	1.40086e+06	1	fig|1400861.3.peg.1599	fig|1400861.3.peg.1601	opposite strand	Isocitrate dehydrogenase [NADP] (EC 1.1.1.42)
Sedimenticola thiotaurini		Gammaproteobacteria incertae sedis.118884	1.54372e+06	1	fig|1543721.15.peg.693	fig|1543721.15.peg.692	opposite strand	Rubrerythrin
Solemya velesiana		Gammaproteobacteria incertae sedis.118884	1.91895e+06	1	fig|1918948.3.peg.100	fig|1918948.3.peg.99	opposite strand	Hybrid peroxiredoxin hyPrx5 (EC 1.11.1.15)
Competibacter phosphatis		Gammaproteobacteria incertae sedis.118884	221281	1	fig|221280.8.peg.193	fig|221280.8.peg.194	opposite strand	Isocitrate dehydrogenase [NADP] (EC 1.1.1.42)
Halospina denitrificans		Gammaproteobacteria incertae sedis.118884	332522	1	fig|332522.3.peg.614	fig|332522.3.peg.613	opposite strand	hypothetical protein
Pseudohongiella spirulinae		Gammaproteobacteria incertae sedis.118884	1.24955e+06	1	fig|1249552.6.peg.2640	fig|1249552.6.peg.2642	same strand	ATP-dependent Clp protease proteolytic subunit ClpP (EC 3.4.21.92)
Pseudohongiella acticola		Gammaproteobacteria incertae sedis.118884	1.52425e+06	1	fig|1524254.4.peg.2391	fig|1524254.4.peg.2389	same strand	ATP-dependent Clp protease proteolytic subunit ClpP (EC 3.4.21.92)
Thioglobus perditus		Gammaproteobacteria incertae sedis.118884	2.0585e+06	1	fig|2058498.3.peg.1250	fig|2058498.3.peg.1247	same strand	hypothetical protein
Thiohalorhabdus denitrificans		Gammaproteobacteria incertae sedis.118884	381307	1	fig|381306.7.peg.1858	fig|381306.7.peg.1857	same strand	hypothetical protein
Celerinatantimonas diazotrophica		Gammaproteobacteria incertae sedis.118884	412034	1	fig|412034.4.peg.774	fig|412034.4.peg.773	same strand	hypothetical protein
Plasticicumulans acidivorans		Gammaproteobacteria incertae sedis.118884	886465	1	fig|886464.6.peg.1922	fig|886464.6.peg.1924	same strand	hypothetical protein
Coxiella burnetii	Coxiellaceae.118968	Legionellales.118969	227378	1	fig|227377.7.peg.1476	fig|227377.7.peg.1477	opposite strand	Alkyl hydroperoxide reductase protein C (EC 1.11.1.15)
Rickettsiella viridis	Coxiellaceae.118968	Legionellales.118969	676208	1	fig|676208.3.peg.832	fig|676208.3.peg.831	opposite strand	Alkyl hydroperoxide reductase protein C (EC 1.11.1.15)
Aquicella lusitana	Coxiellaceae.118968	Legionellales.118969	254246	1	fig|254246.3.peg.2112	fig|254246.3.peg.2113	same strand	ApaG protein
Aquicella siphonis	Coxiellaceae.118968	Legionellales.118969	254247	1	fig|254247.3.peg.1551	fig|254247.3.peg.1552	same strand	ApaG protein
Legionella massiliensis	Legionellaceae.444	Legionellales.118969	1.03494e+06	1	fig|1034943.4.peg.1769	fig|1034943.4.peg.1770	opposite strand	Uncharacterized MFS-type transporter
Legionella jamestowniensis	Legionellaceae.444	Legionellales.118969	1.12216e+06	1	fig|1122163.4.peg.2269	fig|1122163.4.peg.2268	opposite strand	Uncharacterized MFS-type transporter
Legionella lansingensis	Legionellaceae.444	Legionellales.118969	1.12216e+06	1	fig|1122164.4.peg.1760	fig|1122164.4.peg.1759	opposite strand	Uncharacterized MFS-type transporter
Legionella shakespearei	Legionellaceae.444	Legionellales.118969	1.12217e+06	1	fig|1122169.6.peg.460	fig|1122169.6.peg.458	opposite strand	Uncharacterized MFS-type transporter
Legionella drozanskii	Legionellaceae.444	Legionellales.118969	1.21249e+06	1	fig|1212489.5.peg.2425	fig|1212489.5.peg.2426	opposite strand	Putative transmembrane protein
Legionella fallonii	Legionellaceae.444	Legionellales.118969	1.21249e+06	1	fig|1212491.3.peg.1903	fig|1212491.3.peg.1904	opposite strand	Uncharacterized MFS-type transporter
Legionella norrlandica	Legionellaceae.444	Legionellales.118969	1.4985e+06	1	fig|1498499.3.peg.1222	fig|1498499.3.peg.1221	opposite strand	hypothetical protein
Legionella clemsonensis	Legionellaceae.444	Legionellales.118969	1.86785e+06	1	fig|1867846.3.peg.2256	fig|1867846.3.peg.2257	opposite strand	Uncharacterized MFS-type transporter
Legionella brunensis	Legionellaceae.444	Legionellales.118969	29422.6	1	fig|29422.6.peg.40	fig|29422.6.peg.41	opposite strand	Uncharacterized MFS-type transporter
Legionella moravica	Legionellaceae.444	Legionellales.118969	39962.7	1	fig|39962.7.peg.1526	fig|39962.7.peg.1525	opposite strand	Uncharacterized MFS-type transporter
Legionella tucsonensis	Legionellaceae.444	Legionellales.118969	40335.8	1	fig|40335.8.peg.1625	fig|40335.8.peg.1624	opposite strand	Alkyl hydroperoxide reductase protein C (EC 1.11.1.15)
Legionella erythra	Legionellaceae.444	Legionellales.118969	448.7	1	fig|448.7.peg.62	fig|448.7.peg.61	opposite strand	Uncharacterized MFS-type transporter
Legionella hackeliae	Legionellaceae.444	Legionellales.118969	449.7	1	fig|449.7.peg.2886	fig|449.7.peg.2885	opposite strand	Uncharacterized MFS-type transporter
Legionella donaldsonii	Legionellaceae.444	Legionellales.118969	45060.3	1	fig|45060.3.peg.2452	fig|45060.3.peg.2453	opposite strand	Uncharacterized MFS-type transporter
Legionella geestiana	Legionellaceae.444	Legionellales.118969	45065.7	1	fig|45065.7.peg.77	fig|45065.7.peg.76	opposite strand	hypothetical protein
Legionella nautarum	Legionellaceae.444	Legionellales.118969	45070.6	1	fig|45070.6.peg.499	fig|45070.6.peg.498	opposite strand	Putative transmembrane protein
Legionella quateirensis	Legionellaceae.444	Legionellales.118969	45072.6	1	fig|45072.6.peg.1756	fig|45072.6.peg.1755	opposite strand	Uncharacterized MFS-type transporter
Legionella quinlivanii	Legionellaceae.444	Legionellales.118969	45073.5	1	fig|45073.5.peg.1489	fig|45073.5.peg.1491	opposite strand	hypothetical protein
Legionella feeleii	Legionellaceae.444	Legionellales.118969	453.7	1	fig|453.7.peg.1164	fig|453.7.peg.1163	opposite strand	Uncharacterized MFS-type transporter
Legionella jordanis	Legionellaceae.444	Legionellales.118969	456.7	1	fig|456.7.peg.2024	fig|456.7.peg.2025	opposite strand	Uncharacterized MFS-type transporter
Legionella rubrilucens	Legionellaceae.444	Legionellales.118969	458.5	1	fig|458.5.peg.1074	fig|458.5.peg.1073	opposite strand	Uncharacterized MFS-type transporter
Fluoribacter gormanii	Legionellaceae.444	Legionellales.118969	464.13	1	fig|464.13.peg.2891	fig|464.13.peg.2890	opposite strand	Alkyl hydroperoxide reductase protein C (EC 1.11.1.15)
Legionella maceachernii	Legionellaceae.444	Legionellales.118969	466.12	1	fig|466.12.peg.3032	fig|466.12.peg.3033	opposite strand	Putative transmembrane protein
Legionella waltersii	Legionellaceae.444	Legionellales.118969	66969.8	1	fig|66969.8.peg.811	fig|66969.8.peg.810	opposite strand	Uncharacterized MFS-type transporter
Legionella taurinensis	Legionellaceae.444	Legionellales.118969	70611.7	1	fig|70611.7.peg.2272	fig|70611.7.peg.2273	opposite strand	Uncharacterized MFS-type transporter
Legionella pneumophila	Legionellaceae.444	Legionellales.118969	866628	1	fig|866628.3.peg.2896	fig|866628.3.peg.2897	opposite strand	Uncharacterized MFS-type transporter
Legionella busanensis	Legionellaceae.444	Legionellales.118969	190655	1	fig|190655.3.peg.2960	fig|190655.3.peg.2961	same strand	hypothetical protein
Legionella fairfieldensis	Legionellaceae.444	Legionellales.118969	45064.4	1	fig|45064.4.peg.2228	fig|45064.4.peg.2229	same strand	hypothetical protein
Legionella spiritensis	Legionellaceae.444	Legionellales.118969	452.8	1	fig|452.8.peg.2064	fig|452.8.peg.2065	same strand	hypothetical protein
Legionella beliardensis	Legionellaceae.444	Legionellales.118969	91822.3	1	fig|91822.3.peg.2588	fig|91822.3.peg.2589	same strand	hypothetical protein
Legionella gresilensis	Legionellaceae.444	Legionellales.118969	91823.3	1	fig|91823.3.peg.1521	fig|91823.3.peg.1522	same strand	hypothetical protein
Methylovulum miyakonense	Methylococcaceae.403	Methylococcales.135618	1.07885e+06	1	fig|1078846.3.peg.3454	fig|1078846.3.peg.3453	opposite strand	Putative transmembrane protein
Methylomonas koyamae	Methylococcaceae.403	Methylococcales.135618	1.29426e+06	1	fig|1294261.13.peg.3621	fig|1294261.13.peg.3626	opposite strand	hypothetical protein
Methylobacter tundripaludum	Methylococcaceae.403	Methylococcales.135618	1.40845e+06	1	fig|1408450.3.peg.2460	fig|1408450.3.peg.2462	opposite strand	Catalase-peroxidase KatG (EC 1.11.1.21)
Methylomonas denitrificans	Methylococcaceae.403	Methylococcales.135618	1.53855e+06	1	fig|1538553.4.peg.800	fig|1538553.4.peg.799	opposite strand	Catalase KatE (EC 1.11.1.6)
Methylospira mobilis	Methylococcaceae.403	Methylococcales.135618	1.80898e+06	1	fig|1808979.3.peg.4695	fig|1808979.3.peg.4694	opposite strand	Peroxiredoxin family protein
Methylomicrobium kenyense	Methylococcaceae.403	Methylococcales.135618	269709	1	fig|269709.4.peg.73	fig|269709.4.peg.71	opposite strand	Catalase-peroxidase KatG (EC 1.11.1.21)
Methylomonas clara	Methylococcaceae.403	Methylococcales.135618	417.5	1	fig|417.5.peg.1074	fig|417.5.peg.1073	opposite strand	Catalase-peroxidase KatG (EC 1.11.1.21)
Methylomonas methanica	Methylococcaceae.403	Methylococcales.135618	421.18	1	fig|421.18.peg.1015	fig|421.18.peg.1014	opposite strand	Catalase KatE (EC 1.11.1.6)
Methylomicrobium album	Methylococcaceae.403	Methylococcales.135618	686341	1	fig|686340.8.peg.2148	fig|686340.8.peg.2150	opposite strand	Catalase-peroxidase KatG (EC 1.11.1.21)
Methylosarcina fibrata	Methylococcaceae.403	Methylococcales.135618	1.13244e+06	1	fig|1132443.3.peg.1145	fig|1132443.3.peg.1147	same strand	FIG005429: hypothetical protein
Methyloprofundus sedimenti	Methylococcaceae.403	Methylococcales.135618	1.42085e+06	1	fig|1420851.6.peg.2215	fig|1420851.6.peg.2214	same strand	Cytochrome c551 peroxidase (EC 1.11.1.5)
Methylovulum psychrotolerans	Methylococcaceae.403	Methylococcales.135618	1.7045e+06	1	fig|1704499.3.peg.285	fig|1704499.3.peg.286	same strand	Nudix-related transcriptional regulator NrtR
Agitococcus lubricus	Moraxellaceae.468	Moraxellales.2887326	1.07726e+06	1	fig|1077255.3.peg.104	fig|1077255.3.peg.102	opposite strand	Nucleoside-diphosphate-sugar epimerases
Fluviicoccus keumensis	Moraxellaceae.468	Moraxellales.2887326	1.43547e+06	1	fig|1435465.3.peg.411	fig|1435465.3.peg.410	opposite strand	Nucleoside-diphosphate-sugar epimerases
Fontimonas thermophila	Nevskiaceae.568386	Nevskiales.1775403	1.07694e+06	1	fig|1076937.3.peg.1873	fig|1076937.3.peg.1875	opposite strand	hypothetical protein
Nevskia ramosa	Sinobacteraceae.568386	Nevskiales.1775403	1.1226e+06	1	fig|1122603.18.peg.1974	fig|1122603.18.peg.1973	same strand	Coproporphyrinogen III oxidase, aerobic (EC 1.3.3.3)
Nevskia soli	Sinobacteraceae.568386	Nevskiales.1775403	1.1226e+06	1	fig|1122604.3.peg.2018	fig|1122604.3.peg.2016	same strand	Coproporphyrinogen III oxidase, aerobic (EC 1.3.3.3)
Solimonas soli	Sinobacteraceae.568386	Nevskiales.1775403	1.12326e+06	1	fig|1123261.3.peg.632	fig|1123261.3.peg.633	same strand	Coproporphyrinogen III oxidase, aerobic (EC 1.3.3.3)
Hydrocarboniphaga effusa	Sinobacteraceae.568386	Nevskiales.1775403	1.17219e+06	1	fig|1172194.9.peg.1800	fig|1172194.9.peg.1799	same strand	Coproporphyrinogen III oxidase, aerobic (EC 1.3.3.3)
Solimonas terrae	Sinobacteraceae.568386	Nevskiales.1775403	1.39682e+06	1	fig|1396819.4.peg.2173	fig|1396819.4.peg.2172	same strand	Coproporphyrinogen III oxidase, aerobic (EC 1.3.3.3)
Polycyclovorans algicola	Sinobacteraceae.568386	Nevskiales.1775403	1.41578e+06	1	fig|1415779.3.peg.1187	fig|1415779.3.peg.1186	same strand	Coproporphyrinogen III oxidase, aerobic (EC 1.3.3.3)
Panacagrimonas perspica	Sinobacteraceae.568386	Nevskiales.1775403	381431	1	fig|381431.3.peg.3088	fig|381431.3.peg.3089	same strand	Coproporphyrinogen III oxidase, aerobic (EC 1.3.3.3)
Solimonas aquatica	Sinobacteraceae.568386	Nevskiales.1775403	489703	1	fig|489703.3.peg.650	fig|489703.3.peg.651	same strand	hypothetical protein
Hydrocarboniphaga daqingensis	Sinobacteraceae.568386	Nevskiales.1775403	490188	1	fig|490188.4.peg.827	fig|490188.4.peg.828	same strand	Coproporphyrinogen III oxidase, aerobic (EC 1.3.3.3)
Sinimarinibacterium flocculans	Sinobacteraceae.568386	Nevskiales.1775403	985250	1	fig|985250.3.peg.2699	fig|985250.3.peg.2700	same strand	Coproporphyrinogen III oxidase, aerobic (EC 1.3.3.3)
Steroidobacter agariperforans	Steroidobacteraceae.2689614	Nevskiales.1775403	268404	1	fig|268404.3.peg.6791	fig|268404.3.peg.6790	same strand	hypothetical protein
Steroidobacter denitrificans	Steroidobacteraceae.2689614	Nevskiales.1775403	465722	1	fig|465721.9.peg.3195	fig|465721.9.peg.3193	same strand	hypothetical protein
Alcanivorax xenomutans	Alcanivoracaceae.224372	Oceanospirillales.135619	1.09434e+06	1	fig|1094342.5.peg.564	fig|1094342.5.peg.565	opposite strand	Nucleoside-diphosphate-sugar epimerases
Alcanivorax hongdengensis	Alcanivoracaceae.224372	Oceanospirillales.135619	1.17718e+06	1	fig|1177179.3.peg.1792	fig|1177179.3.peg.1793	opposite strand	Nucleoside-diphosphate-sugar epimerases
Alcanivorax jadensis	Alcanivoracaceae.224372	Oceanospirillales.135619	1.17718e+06	1	fig|1177181.3.peg.2873	fig|1177181.3.peg.2874	opposite strand	Nucleoside-diphosphate-sugar epimerases
Alcanivorax gelatiniphagus	Alcanivoracaceae.224372	Oceanospirillales.135619	1.19417e+06	1	fig|1194167.3.peg.3189	fig|1194167.3.peg.3190	opposite strand	Nucleoside-diphosphate-sugar epimerases
Ketobacter alkanivorans	Alcanivoracaceae.224372	Oceanospirillales.135619	1.91742e+06	1	fig|1917421.3.peg.2105	fig|1917421.3.peg.2106	opposite strand	Nucleoside-diphosphate-sugar epimerases
Alcanivorax mobilis	Alcanivoracaceae.224372	Oceanospirillales.135619	2.01957e+06	1	fig|2019569.3.peg.59	fig|2019569.3.peg.58	opposite strand	Nucleoside-diphosphate-sugar epimerases
Alcanivorax pacificus	Alcanivoracaceae.224372	Oceanospirillales.135619	391936	1	fig|391936.3.peg.771	fig|391936.3.peg.770	opposite strand	Nucleoside-diphosphate-sugar epimerases
Alcanivorax borkumensis	Alcanivoracaceae.224372	Oceanospirillales.135619	393595	1	fig|393595.15.peg.178	fig|393595.15.peg.179	opposite strand	Nucleoside-diphosphate-sugar epimerases
Alcanivorax dieselolei	Alcanivoracaceae.224372	Oceanospirillales.135619	930169	1	fig|930169.3.peg.150	fig|930169.3.peg.151	opposite strand	Nucleoside-diphosphate-sugar epimerases
Marinicella litoralis	Alcanivoracaceae.224372	Oceanospirillales.135619	644220	1	fig|644220.5.peg.1880	fig|644220.5.peg.1879	same strand	Membrane alanine aminopeptidase N (EC 3.4.11.2)
Balneatrix alpica	Balneatrichaceae.2301193	Oceanospirillales.135619	1.1211e+06	1	fig|1121103.3.peg.284	fig|1121103.3.peg.285	opposite strand	putative pyrophosphatase
Endozoicomonas numazuensis	Endozoicomonadaceae.2066474	Oceanospirillales.135619	1.1378e+06	1	fig|1137799.5.peg.1656	fig|1137799.5.peg.1657	opposite strand	hypothetical protein
Endozoicomonas atrinae	Endozoicomonadaceae.2066474	Oceanospirillales.135619	1.33366e+06	1	fig|1333660.3.peg.688	fig|1333660.3.peg.689	opposite strand	Nucleoside-diphosphate-sugar epimerases
Endozoicomonas ascidiicola	Endozoicomonadaceae.2066474	Oceanospirillales.135619	1.69852e+06	1	fig|1698521.17.peg.504	fig|1698521.17.peg.505	opposite strand	Nucleoside-diphosphate-sugar epimerases
Endozoicomonas acroporae	Endozoicomonadaceae.2066474	Oceanospirillales.135619	1.7011e+06	1	fig|1701104.3.peg.1133	fig|1701104.3.peg.1132	opposite strand	Nucleoside-diphosphate-sugar epimerases
Endozoicomonas elysicola	Endozoicomonadaceae.2066474	Oceanospirillales.135619	305900	1	fig|305900.3.peg.2049	fig|305900.3.peg.2048	opposite strand	Nucleoside-diphosphate-sugar epimerases
Endozoicomonas montiporae	Endozoicomonadaceae.2066474	Oceanospirillales.135619	570277	1	fig|570277.3.peg.173	fig|570277.3.peg.170	opposite strand	Nucleoside-diphosphate-sugar epimerases
Hahella ganghwensis	Hahellaceae.224379	Oceanospirillales.135619	1.12194e+06	1	fig|1121935.11.peg.638	fig|1121935.11.peg.637	opposite strand	Nucleoside-diphosphate-sugar epimerases
Zooshikella ganghwensis	Hahellaceae.224379	Oceanospirillales.135619	202772	1	fig|202772.3.peg.180	fig|202772.3.peg.181	opposite strand	Nucleoside-diphosphate-sugar epimerases
Sansalvadorimonas verongulae	Hahellaceae.224379	Oceanospirillales.135619	2.17282e+06	1	fig|2172824.3.peg.889	fig|2172824.3.peg.890	opposite strand	Nucleoside-diphosphate-sugar epimerases
Hahella chejuensis	Hahellaceae.224379	Oceanospirillales.135619	349522	1	fig|349521.8.peg.5739	fig|349521.8.peg.5740	opposite strand	Nucleoside-diphosphate-sugar epimerases
Cobetia pacifica	Halomonadaceae.28256	Oceanospirillales.135619	1.0551e+06	1	fig|1055101.3.peg.1814	fig|1055101.3.peg.1813	opposite strand	Nucleoside-diphosphate-sugar epimerases
Halomonas boliviensis	Halomonadaceae.28256	Oceanospirillales.135619	1.07258e+06	1	fig|1072583.4.peg.1241	fig|1072583.4.peg.1240	opposite strand	Nucleoside-diphosphate-sugar epimerases
Halomonas socia	Halomonadaceae.28256	Oceanospirillales.135619	1.08187e+06	1	fig|1081866.4.peg.1221	fig|1081866.4.peg.1220	opposite strand	Nucleoside-diphosphate-sugar epimerases
Halomonas anticariensis	Halomonadaceae.28256	Oceanospirillales.135619	1.12194e+06	1	fig|1121939.11.peg.3854	fig|1121939.11.peg.3855	opposite strand	Nucleoside-diphosphate-sugar epimerases
Halomonas halocynthiae	Halomonadaceae.28256	Oceanospirillales.135619	1.12194e+06	1	fig|1121940.3.peg.2648	fig|1121940.3.peg.2649	opposite strand	Nucleoside-diphosphate-sugar epimerases
Halomonas halodenitrificans	Halomonadaceae.28256	Oceanospirillales.135619	1.12194e+06	1	fig|1121941.3.peg.1138	fig|1121941.3.peg.1137	opposite strand	Nucleoside-diphosphate-sugar epimerases
Halomonas ilicicola	Halomonadaceae.28256	Oceanospirillales.135619	1.12194e+06	1	fig|1121942.4.peg.1192	fig|1121942.4.peg.1193	opposite strand	hypothetical protein
Halomonas lutea	Halomonadaceae.28256	Oceanospirillales.135619	1.12194e+06	1	fig|1121943.4.peg.1862	fig|1121943.4.peg.1863	opposite strand	Nucleoside-diphosphate-sugar epimerases
Kushneria aurantia	Halomonadaceae.28256	Oceanospirillales.135619	1.12214e+06	1	fig|1122139.9.peg.238	fig|1122139.9.peg.237	opposite strand	Nucleoside-diphosphate-sugar epimerases
Kushneria indalinina	Halomonadaceae.28256	Oceanospirillales.135619	1.12214e+06	1	fig|1122140.3.peg.1868	fig|1122140.3.peg.1867	opposite strand	Nucleoside-diphosphate-sugar epimerases
Zymobacter palmae	Halomonadaceae.28256	Oceanospirillales.135619	1.12351e+06	1	fig|1123510.3.peg.69	fig|1123510.3.peg.68	opposite strand	Nucleoside-diphosphate-sugar epimerases
Halomonas lionensis	Halomonadaceae.28256	Oceanospirillales.135619	1.14448e+06	1	fig|1144478.6.peg.3597	fig|1144478.6.peg.3598	opposite strand	Nucleoside-diphosphate-sugar epimerases
Halomonas axialensis	Halomonadaceae.28256	Oceanospirillales.135619	115555	1	fig|115555.3.peg.1162	fig|115555.3.peg.1163	opposite strand	Nucleoside-diphosphate-sugar epimerases
Halomonas hydrothermalis	Halomonadaceae.28256	Oceanospirillales.135619	115562	1	fig|115561.8.peg.1769	fig|115561.8.peg.1770	opposite strand	Nucleoside-diphosphate-sugar epimerases
Halomonas xinjiangensis	Halomonadaceae.28256	Oceanospirillales.135619	1.16695e+06	1	fig|1166948.3.peg.2650	fig|1166948.3.peg.2649	opposite strand	Nucleoside-diphosphate-sugar epimerases
Halomonas songnenensis	Halomonadaceae.28256	Oceanospirillales.135619	1.17624e+06	1	fig|1176243.5.peg.1727	fig|1176243.5.peg.1726	opposite strand	Nucleoside-diphosphate-sugar epimerases
Halomonas stevensii	Halomonadaceae.28256	Oceanospirillales.135619	1.17712e+06	1	fig|1177117.3.peg.2253	fig|1177117.3.peg.2254	opposite strand	Nucleoside-diphosphate-sugar epimerases
Halomonas huangheensis	Halomonadaceae.28256	Oceanospirillales.135619	1.17848e+06	1	fig|1178482.5.peg.4235	fig|1178482.5.peg.4234	opposite strand	Nucleoside-diphosphate-sugar epimerases
Halomonas muralis	Halomonadaceae.28256	Oceanospirillales.135619	119000	1	fig|119000.3.peg.2575	fig|119000.3.peg.2574	opposite strand	Nucleoside-diphosphate-sugar epimerases
Halomonas desiderata	Halomonadaceae.28256	Oceanospirillales.135619	1.19121e+06	1	fig|1191209.3.peg.2427	fig|1191209.3.peg.2428	opposite strand	Nucleoside-diphosphate-sugar epimerases
Halomonas titanicae	Halomonadaceae.28256	Oceanospirillales.135619	1.20474e+06	1	fig|1204738.3.peg.796	fig|1204738.3.peg.797	opposite strand	Nucleoside-diphosphate-sugar epimerases
Halomonas jeotgali	Halomonadaceae.28256	Oceanospirillales.135619	1.23819e+06	1	fig|1238190.3.peg.314	fig|1238190.3.peg.313	opposite strand	Nucleoside-diphosphate-sugar epimerases
Salinicola peritrichatus	Halomonadaceae.28256	Oceanospirillales.135619	1.26742e+06	1	fig|1267424.3.peg.2903	fig|1267424.3.peg.2904	opposite strand	Nucleoside-diphosphate-sugar epimerases
Carnimonas nigrificans	Halomonadaceae.28256	Oceanospirillales.135619	1.33625e+06	1	fig|1336245.3.peg.1783	fig|1336245.3.peg.1784	opposite strand	Nucleoside-diphosphate-sugar epimerases
Halotalea alkalilenta	Halomonadaceae.28256	Oceanospirillales.135619	1.40335e+06	1	fig|1403347.3.peg.1099	fig|1403347.3.peg.1100	opposite strand	Nucleoside-diphosphate-sugar epimerases
Chromohalobacter canadensis	Halomonadaceae.28256	Oceanospirillales.135619	141389	1	fig|141389.4.peg.1357	fig|141389.4.peg.1356	opposite strand	NAD-dependent epimerase/dehydratase
Chromohalobacter israelensis	Halomonadaceae.28256	Oceanospirillales.135619	141390	1	fig|141390.3.peg.2222	fig|141390.3.peg.2223	opposite strand	NAD-dependent epimerase/dehydratase
Halomonas zincidurans	Halomonadaceae.28256	Oceanospirillales.135619	1.44648e+06	1	fig|1446475.3.peg.2958	fig|1446475.3.peg.2959	opposite strand	Nucleoside-diphosphate-sugar epimerases
Halomonas alimentaria	Halomonadaceae.28256	Oceanospirillales.135619	147248	1	fig|147248.4.peg.1877	fig|147248.4.peg.1876	opposite strand	Nucleoside-diphosphate-sugar epimerases
Salinicola acroporae	Halomonadaceae.28256	Oceanospirillales.135619	1.54144e+06	1	fig|1541440.3.peg.2108	fig|1541440.3.peg.2109	opposite strand	Nucleoside-diphosphate-sugar epimerases
Kushneria marisflavi	Halomonadaceae.28256	Oceanospirillales.135619	157780	1	fig|157779.6.peg.2317	fig|157779.6.peg.2316	opposite strand	Nucleoside-diphosphate-sugar epimerases
Halomonas urumqiensis	Halomonadaceae.28256	Oceanospirillales.135619	1.68479e+06	1	fig|1684789.6.peg.1998	fig|1684789.6.peg.1997	opposite strand	Nucleoside-diphosphate-sugar epimerases
Salinicola tamaricis	Halomonadaceae.28256	Oceanospirillales.135619	1.77131e+06	1	fig|1771309.3.peg.1875	fig|1771309.3.peg.1876	opposite strand	Nucleoside-diphosphate-sugar epimerases
Salinicola halophilus	Halomonadaceae.28256	Oceanospirillales.135619	184065	1	fig|184065.3.peg.2739	fig|184065.3.peg.2740	opposite strand	Nucleoside-diphosphate-sugar epimerases
Halomonas saliphila	Halomonadaceae.28256	Oceanospirillales.135619	1.84846e+06	1	fig|1848458.3.peg.3135	fig|1848458.3.peg.3134	opposite strand	Nucleoside-diphosphate-sugar epimerases
Pistricoccus aurantiacus	Halomonadaceae.28256	Oceanospirillales.135619	1.88341e+06	1	fig|1883414.3.peg.817	fig|1883414.3.peg.816	opposite strand	Nucleoside-diphosphate-sugar epimerases
Halomonas endophytica	Halomonadaceae.28256	Oceanospirillales.135619	2.0338e+06	1	fig|2033802.3.peg.1635	fig|2033802.3.peg.1636	opposite strand	Nucleoside-diphosphate-sugar epimerases
Halomonas campaniensis	Halomonadaceae.28256	Oceanospirillales.135619	213554	1	fig|213554.3.peg.1190	fig|213554.3.peg.1191	opposite strand	Nucleoside-diphosphate-sugar epimerases
Chromohalobacter japonicus	Halomonadaceae.28256	Oceanospirillales.135619	223900	1	fig|223900.3.peg.663	fig|223900.3.peg.664	opposite strand	NAD-dependent epimerase/dehydratase
Halomonas ventosae	Halomonadaceae.28256	Oceanospirillales.135619	229007	1	fig|229007.12.peg.2951	fig|229007.12.peg.2952	opposite strand	Nucleoside-diphosphate-sugar epimerases
Halomonas alkaliantarctica	Halomonadaceae.28256	Oceanospirillales.135619	232347	1	fig|232346.9.peg.2095	fig|232346.9.peg.2096	opposite strand	Nucleoside-diphosphate-sugar epimerases
Halomonas halmophila	Halomonadaceae.28256	Oceanospirillales.135619	252.3	1	fig|252.3.peg.1834	fig|252.3.peg.1835	opposite strand	Nucleoside-diphosphate-sugar epimerases
Halomonas alkaliphila	Halomonadaceae.28256	Oceanospirillales.135619	272774	1	fig|272774.3.peg.1281	fig|272774.3.peg.1280	opposite strand	Nucleoside-diphosphate-sugar epimerases
Cobetia marina	Halomonadaceae.28256	Oceanospirillales.135619	28258.2	1	fig|28258.17.peg.3142	fig|28258.17.peg.3143	opposite strand	Nucleoside-diphosphate-sugar epimerases
Halomonas taeanensis	Halomonadaceae.28256	Oceanospirillales.135619	284577	1	fig|284577.13.peg.539	fig|284577.13.peg.538	opposite strand	Nucleoside-diphosphate-sugar epimerases
Chromohalobacter salexigens	Halomonadaceae.28256	Oceanospirillales.135619	290398	1	fig|290398.11.peg.3260	fig|290398.11.peg.3259	opposite strand	NAD-dependent epimerase/dehydratase
Halomonas meridiana	Halomonadaceae.28256	Oceanospirillales.135619	29570.8	1	fig|29570.8.peg.3315	fig|29570.8.peg.3316	opposite strand	Nucleoside-diphosphate-sugar epimerases
Halomonas subglaciescola	Halomonadaceae.28256	Oceanospirillales.135619	29571.3	1	fig|29571.3.peg.1871	fig|29571.3.peg.1872	opposite strand	Nucleoside-diphosphate-sugar epimerases
Halomonas halophila	Halomonadaceae.28256	Oceanospirillales.135619	29573.3	1	fig|29573.3.peg.2446	fig|29573.3.peg.2447	opposite strand	Nucleoside-diphosphate-sugar epimerases
Halovibrio variabilis	Halomonadaceae.28256	Oceanospirillales.135619	31910.4	1	fig|31910.4.peg.2299	fig|31910.4.peg.2298	opposite strand	Nucleoside-diphosphate-sugar epimerases
Halomonas smyrnensis	Halomonadaceae.28256	Oceanospirillales.135619	339656	1	fig|339656.4.peg.2517	fig|339656.4.peg.2516	opposite strand	Nucleoside-diphosphate-sugar epimerases
Halomonas denitrificans	Halomonadaceae.28256	Oceanospirillales.135619	370769	1	fig|370769.4.peg.2282	fig|370769.4.peg.2283	opposite strand	Nucleoside-diphosphate-sugar epimerases
Halomonas gudaonensis	Halomonadaceae.28256	Oceanospirillales.135619	376428	1	fig|376427.9.peg.2499	fig|376427.9.peg.2498	opposite strand	Nucleoside-diphosphate-sugar epimerases
Halomonas sinaiensis	Halomonadaceae.28256	Oceanospirillales.135619	379597	1	fig|379597.3.peg.2210	fig|379597.3.peg.2211	opposite strand	Nucleoside-diphosphate-sugar epimerases
Halomonas olivaria	Halomonadaceae.28256	Oceanospirillales.135619	390919	1	fig|390919.4.peg.7925	fig|390919.4.peg.7926	opposite strand	Nucleoside-diphosphate-sugar epimerases
Kushneria avicenniae	Halomonadaceae.28256	Oceanospirillales.135619	402385	1	fig|402385.4.peg.1843	fig|402385.4.peg.1842	opposite strand	Nucleoside-diphosphate-sugar epimerases
Salinicola socius	Halomonadaceae.28256	Oceanospirillales.135619	404434	1	fig|404433.6.peg.682	fig|404433.6.peg.683	opposite strand	Nucleoside-diphosphate-sugar epimerases
Halomonas saccharevitans	Halomonadaceae.28256	Oceanospirillales.135619	416872	1	fig|416872.17.peg.2970	fig|416872.17.peg.2971	opposite strand	Nucleoside-diphosphate-sugar epimerases
Halomonas arcis	Halomonadaceae.28256	Oceanospirillales.135619	416874	1	fig|416873.6.peg.1555	fig|416873.6.peg.1554	opposite strand	Nucleoside-diphosphate-sugar epimerases
Halomonas subterranea	Halomonadaceae.28256	Oceanospirillales.135619	416875	1	fig|416874.6.peg.3424	fig|416874.6.peg.3425	opposite strand	Nucleoside-diphosphate-sugar epimerases
Halomonas daqingensis	Halomonadaceae.28256	Oceanospirillales.135619	419596	1	fig|419596.3.peg.3128	fig|419596.3.peg.3127	opposite strand	Nucleoside-diphosphate-sugar epimerases
Halomonas shengliensis	Halomonadaceae.28256	Oceanospirillales.135619	419597	1	fig|419597.17.peg.1035	fig|419597.17.peg.1036	opposite strand	Nucleoside-diphosphate-sugar epimerases
Chromohalobacter marismortui	Halomonadaceae.28256	Oceanospirillales.135619	42055.3	1	fig|42055.3.peg.2305	fig|42055.3.peg.2306	opposite strand	NAD-dependent epimerase/dehydratase
Halomonas salina	Halomonadaceae.28256	Oceanospirillales.135619	42565.3	1	fig|42565.3.peg.417	fig|42565.3.peg.416	opposite strand	Nucleoside-diphosphate-sugar epimerases
Halomonas eurihalina	Halomonadaceae.28256	Oceanospirillales.135619	42566.3	1	fig|42566.3.peg.2951	fig|42566.3.peg.2950	opposite strand	Nucleoside-diphosphate-sugar epimerases
Salinicola salarius	Halomonadaceae.28256	Oceanospirillales.135619	430458	1	fig|430457.5.peg.1529	fig|430457.5.peg.1530	opposite strand	NAD-dependent epimerase/dehydratase
Halomonas caseinilytica	Halomonadaceae.28256	Oceanospirillales.135619	438745	1	fig|438744.6.peg.284	fig|438744.6.peg.285	opposite strand	Nucleoside-diphosphate-sugar epimerases
Halomonas xianhensis	Halomonadaceae.28256	Oceanospirillales.135619	442342	1	fig|442341.9.peg.3436	fig|442341.9.peg.3437	opposite strand	Nucleoside-diphosphate-sugar epimerases
Halomonas nitroreducens	Halomonadaceae.28256	Oceanospirillales.135619	447425	1	fig|447425.3.peg.3196	fig|447425.3.peg.3197	opposite strand	Nucleoside-diphosphate-sugar epimerases
Halomonas cupida	Halomonadaceae.28256	Oceanospirillales.135619	44933.4	1	fig|44933.4.peg.1624	fig|44933.4.peg.1623	opposite strand	Nucleoside-diphosphate-sugar epimerases
Halomonas venusta	Halomonadaceae.28256	Oceanospirillales.135619	44935.9	1	fig|44935.9.peg.4145	fig|44935.9.peg.4146	opposite strand	Nucleoside-diphosphate-sugar epimerases
Halomonas korlensis	Halomonadaceae.28256	Oceanospirillales.135619	463302	1	fig|463301.7.peg.1743	fig|463301.7.peg.1742	opposite strand	Nucleoside-diphosphate-sugar epimerases
Halomonas beimenensis	Halomonadaceae.28256	Oceanospirillales.135619	475662	1	fig|475662.4.peg.3743	fig|475662.4.peg.3742	opposite strand	Nucleoside-diphosphate-sugar epimerases
Halomonas pantelleriensis	Halomonadaceae.28256	Oceanospirillales.135619	48727.3	1	fig|48727.3.peg.3562	fig|48727.3.peg.3561	opposite strand	Nucleoside-diphosphate-sugar epimerases
Halomonas chromatireducens	Halomonadaceae.28256	Oceanospirillales.135619	507626	1	fig|507626.3.peg.2269	fig|507626.3.peg.2268	opposite strand	Nucleoside-diphosphate-sugar epimerases
Cobetia crustatorum	Halomonadaceae.28256	Oceanospirillales.135619	553386	1	fig|553385.9.peg.1851	fig|553385.9.peg.1850	opposite strand	Nucleoside-diphosphate-sugar epimerases
Aidingimonas halophila	Halomonadaceae.28256	Oceanospirillales.135619	574349	1	fig|574349.3.peg.2858	fig|574349.3.peg.2857	opposite strand	Nucleoside-diphosphate-sugar epimerases
Halomonas zhanjiangensis	Halomonadaceae.28256	Oceanospirillales.135619	574966	1	fig|574966.4.peg.626	fig|574966.4.peg.625	opposite strand	hypothetical protein
Kushneria sinocarnis	Halomonadaceae.28256	Oceanospirillales.135619	595502	1	fig|595502.3.peg.20	fig|595502.3.peg.19	opposite strand	Nucleoside-diphosphate-sugar epimerases
Halomonas daqiaonensis	Halomonadaceae.28256	Oceanospirillales.135619	650850	1	fig|650850.3.peg.1056	fig|650850.3.peg.1057	opposite strand	Nucleoside-diphosphate-sugar epimerases
Halomonas elongata	Halomonadaceae.28256	Oceanospirillales.135619	768066	1	fig|768066.3.peg.3654	fig|768066.3.peg.3653	opposite strand	Nucleoside-diphosphate-sugar epimerases
Halomonas aquamarina	Halomonadaceae.28256	Oceanospirillales.135619	77097.4	1	fig|77097.4.peg.3098	fig|77097.4.peg.3097	opposite strand	Nucleoside-diphosphate-sugar epimerases
Halomonas pacifica	Halomonadaceae.28256	Oceanospirillales.135619	77098.3	1	fig|77098.3.peg.1522	fig|77098.3.peg.1523	opposite strand	Nucleoside-diphosphate-sugar epimerases
Halomonas utahensis	Halomonadaceae.28256	Oceanospirillales.135619	86177.7	1	fig|86177.7.peg.238	fig|86177.7.peg.237	opposite strand	Nucleoside-diphosphate-sugar epimerases
Natronospirillum operossus	Natronospirillaceae.2813859	Oceanospirillales.135619	2.56281e+06	1	fig|2562806.3.peg.552	fig|2562806.3.peg.553	opposite strand	Nucleoside-diphosphate-sugar epimerases
Neptunomonas concharum	Oceanospirillaceae.135620	Oceanospirillales.135619	1.03154e+06	1	fig|1031538.3.peg.274	fig|1031538.3.peg.273	opposite strand	Nucleoside-diphosphate-sugar epimerases
Neptunomonas qingdaonensis	Oceanospirillaceae.135620	Oceanospirillales.135619	1.04556e+06	1	fig|1045558.5.peg.2780	fig|1045558.5.peg.2779	opposite strand	Nucleoside-diphosphate-sugar epimerases
Marinomonas hwangdonensis	Oceanospirillaceae.135620	Oceanospirillales.135619	1.05365e+06	1	fig|1053647.3.peg.1989	fig|1053647.3.peg.1990	opposite strand	Nucleoside-diphosphate-sugar epimerases
Marinobacterium georgiense	Oceanospirillaceae.135620	Oceanospirillales.135619	1.1222e+06	1	fig|1122198.3.peg.2404	fig|1122198.3.peg.2405	opposite strand	Nucleoside-diphosphate-sugar epimerases
Marinobacterium jannaschii	Oceanospirillaceae.135620	Oceanospirillales.135619	1.1222e+06	1	fig|1122200.3.peg.291	fig|1122200.3.peg.290	opposite strand	Nucleoside-diphosphate-sugar epimerases
Marinobacterium litorale	Oceanospirillaceae.135620	Oceanospirillales.135619	1.1222e+06	1	fig|1122201.3.peg.1453	fig|1122201.3.peg.1454	opposite strand	Nucleoside-diphosphate-sugar epimerases
Marinomonas polaris	Oceanospirillaceae.135620	Oceanospirillales.135619	1.12221e+06	1	fig|1122206.4.peg.2041	fig|1122206.4.peg.2042	opposite strand	Nucleoside-diphosphate-sugar epimerases
Marinomonas ushuaiensis	Oceanospirillaceae.135620	Oceanospirillales.135619	1.12221e+06	1	fig|1122207.3.peg.56	fig|1122207.3.peg.55	opposite strand	Nucleoside-diphosphate-sugar epimerases
Marinospirillum alkaliphilum	Oceanospirillaceae.135620	Oceanospirillales.135619	1.12221e+06	1	fig|1122209.3.peg.2923	fig|1122209.3.peg.2922	opposite strand	Nucleoside-diphosphate-sugar epimerases
Marinospirillum celere	Oceanospirillaceae.135620	Oceanospirillales.135619	1.12225e+06	1	fig|1122252.3.peg.2427	fig|1122252.3.peg.2426	opposite strand	Nucleoside-diphosphate-sugar epimerases
Oceanobacter kriegii	Oceanospirillaceae.135620	Oceanospirillales.135619	1.12262e+06	1	fig|1122615.3.peg.1082	fig|1122615.3.peg.1083	opposite strand	Nucleoside-diphosphate-sugar epimerases
Marinomonas fungiae	Oceanospirillaceae.135620	Oceanospirillales.135619	1.13728e+06	1	fig|1137284.4.peg.1464	fig|1137284.4.peg.1463	opposite strand	Nucleoside-diphosphate-sugar epimerases
Bacterioplanes sanyensis	Oceanospirillaceae.135620	Oceanospirillales.135619	1.24955e+06	1	fig|1249553.4.peg.980	fig|1249553.4.peg.981	opposite strand	Nucleoside-diphosphate-sugar epimerases
Thalassolituus oleivorans	Oceanospirillaceae.135620	Oceanospirillales.135619	1.29859e+06	1	fig|1298593.3.peg.167	fig|1298593.3.peg.168	opposite strand	Nucleoside-diphosphate-sugar epimerases
Marinobacterium mangrovicola	Oceanospirillaceae.135620	Oceanospirillales.135619	1.47696e+06	1	fig|1476959.3.peg.2895	fig|1476959.3.peg.2896	opposite strand	Nucleoside-diphosphate-sugar epimerases
Nitrincola alkalilacustris	Oceanospirillaceae.135620	Oceanospirillales.135619	1.57122e+06	1	fig|1571224.3.peg.24	fig|1571224.3.peg.23	opposite strand	Nucleoside-diphosphate-sugar epimerases
Neptunomonas phycophila	Oceanospirillaceae.135620	Oceanospirillales.135619	1.57265e+06	1	fig|1572645.3.peg.2415	fig|1572645.3.peg.2416	opposite strand	Nucleoside-diphosphate-sugar epimerases
Marinomonas primoryensis	Oceanospirillaceae.135620	Oceanospirillales.135619	178399	1	fig|178399.3.peg.907	fig|178399.3.peg.906	opposite strand	Nucleoside-diphosphate-sugar epimerases
Marinomonas spartinae	Oceanospirillaceae.135620	Oceanospirillales.135619	1.79229e+06	1	fig|1792290.7.peg.2392	fig|1792290.7.peg.2391	opposite strand	Nucleoside-diphosphate-sugar epimerases
Marinomonas gallaica	Oceanospirillaceae.135620	Oceanospirillales.135619	1.80667e+06	1	fig|1806667.7.peg.244	fig|1806667.7.peg.245	opposite strand	Nucleoside-diphosphate-sugar epimerases
Bermanella marisrubri	Oceanospirillaceae.135620	Oceanospirillales.135619	207949	1	fig|207949.12.peg.121	fig|207949.12.peg.122	opposite strand	Nucleoside-diphosphate-sugar epimerases
Marinobacterium halophilum	Oceanospirillaceae.135620	Oceanospirillales.135619	267374	1	fig|267374.3.peg.1639	fig|267374.3.peg.1638	opposite strand	Nucleoside-diphosphate-sugar epimerases
Marinomonas communis	Oceanospirillaceae.135620	Oceanospirillales.135619	28254.3	1	fig|28254.3.peg.1724	fig|28254.3.peg.1725	opposite strand	Nucleoside-diphosphate-sugar epimerases
Marinomonas aquimarina	Oceanospirillaceae.135620	Oceanospirillales.135619	295069	1	fig|295068.7.peg.1851	fig|295068.7.peg.1852	opposite strand	Nucleoside-diphosphate-sugar epimerases
Marinomonas arctica	Oceanospirillaceae.135620	Oceanospirillales.135619	383750	1	fig|383750.3.peg.3137	fig|383750.3.peg.3138	opposite strand	Nucleoside-diphosphate-sugar epimerases
Marinobacterium stanieri	Oceanospirillaceae.135620	Oceanospirillales.135619	49186.3	1	fig|49186.3.peg.496	fig|49186.3.peg.495	opposite strand	Nucleoside-diphosphate-sugar epimerases
Marinomonas balearica	Oceanospirillaceae.135620	Oceanospirillales.135619	491947	1	fig|491947.3.peg.2007	fig|491947.3.peg.2008	opposite strand	Nucleoside-diphosphate-sugar epimerases
Marinomonas rhizomae	Oceanospirillaceae.135620	Oceanospirillales.135619	491948	1	fig|491948.4.peg.259	fig|491948.4.peg.260	opposite strand	Nucleoside-diphosphate-sugar epimerases
Marinomonas alcarazii	Oceanospirillaceae.135620	Oceanospirillales.135619	491949	1	fig|491949.3.peg.3312	fig|491949.3.peg.3311	opposite strand	Nucleoside-diphosphate-sugar epimerases
Marinomonas foliarum	Oceanospirillaceae.135620	Oceanospirillales.135619	491951	1	fig|491950.7.peg.1270	fig|491950.7.peg.1271	opposite strand	Nucleoside-diphosphate-sugar epimerases
Marinomonas aquiplantarum	Oceanospirillaceae.135620	Oceanospirillales.135619	491951	1	fig|491951.3.peg.610	fig|491951.3.peg.611	opposite strand	Nucleoside-diphosphate-sugar epimerases
Marinomonas posidonica	Oceanospirillaceae.135620	Oceanospirillales.135619	491952	1	fig|491952.3.peg.3537	fig|491952.3.peg.3536	opposite strand	Nucleoside-diphosphate-sugar epimerases
Marinomonas pollencensis	Oceanospirillaceae.135620	Oceanospirillales.135619	491954	1	fig|491954.3.peg.2049	fig|491954.3.peg.2050	opposite strand	Nucleoside-diphosphate-sugar epimerases
Marinobacterium lutimaris	Oceanospirillaceae.135620	Oceanospirillales.135619	568106	1	fig|568106.5.peg.1262	fig|568106.5.peg.1263	opposite strand	Nucleoside-diphosphate-sugar epimerases
Neptunomonas antarctica	Oceanospirillaceae.135620	Oceanospirillales.135619	619304	1	fig|619304.5.peg.3328	fig|619304.5.peg.3327	opposite strand	Nucleoside-diphosphate-sugar epimerases
Marinospirillum insulare	Oceanospirillaceae.135620	Oceanospirillales.135619	1.12221e+06	1	fig|1122211.3.peg.60	fig|1122211.3.peg.59	same strand	1-deoxy-D-xylulose 5-phosphate synthase (EC 2.2.1.7)
Marinospirillum minutulum	Oceanospirillaceae.135620	Oceanospirillales.135619	1.12221e+06	1	fig|1122212.3.peg.2510	fig|1122212.3.peg.2511	same strand	1-deoxy-D-xylulose 5-phosphate synthase (EC 2.2.1.7)
Oceanospirillum maris	Oceanospirillaceae.135620	Oceanospirillales.135619	1.12262e+06	1	fig|1122617.3.peg.40	fig|1122617.3.peg.38	same strand	Proline dehydrogenase (EC 1.5.5.2) / Delta-1-pyrroline-5-carboxylate dehydrogenase (EC 1.2.1.88)
Nitrincola nitratireducens	Oceanospirillaceae.135620	Oceanospirillales.135619	1.22952e+06	1	fig|1229521.9.peg.2567	fig|1229521.9.peg.2566	same strand	Polyphosphate kinase (EC 2.7.4.1)
Nitrincola alkalisediminis	Oceanospirillaceae.135620	Oceanospirillales.135619	1.36666e+06	1	fig|1366656.3.peg.2939	fig|1366656.3.peg.2938	same strand	Polyphosphate kinase (EC 2.7.4.1)
Nitrincola schmidtii	Oceanospirillaceae.135620	Oceanospirillales.135619	1.73089e+06	1	fig|1730894.3.peg.637	fig|1730894.3.peg.636	same strand	Polyphosphate kinase (EC 2.7.4.1)
Nitrincola lacisaponensis	Oceanospirillaceae.135620	Oceanospirillales.135619	267850	1	fig|267850.20.peg.2683	fig|267850.20.peg.2682	same strand	Polyphosphate kinase (EC 2.7.4.1)
Oceanospirillum multiglobuliferum	Oceanospirillaceae.135620	Oceanospirillales.135619	64969.3	1	fig|64969.3.peg.2576	fig|64969.3.peg.2578	same strand	Proline dehydrogenase (EC 1.5.5.2) / Delta-1-pyrroline-5-carboxylate dehydrogenase (EC 1.2.1.88)
Pseudospirillum japonicum	Oceanospirillaceae.135620	Oceanospirillales.135619	64971.3	1	fig|64971.3.peg.962	fig|64971.3.peg.963	same strand	Biosynthetic arginine decarboxylase (EC 4.1.1.19)
Oceanospirillum linum	Oceanospirillaceae.135620	Oceanospirillales.135619	966.3	1	fig|966.3.peg.1216	fig|966.3.peg.1219	same strand	Proline dehydrogenase (EC 1.5.5.2) / Delta-1-pyrroline-5-carboxylate dehydrogenase (EC 1.2.1.88)
Terasakiispira papahanaumokuakeensis	Oceanospirillales incertae sedis.376625	Oceanospirillales.135619	197479	1	fig|197479.3.peg.3580	fig|197479.3.peg.3581	opposite strand	Nucleoside-diphosphate-sugar epimerases
Oleiphilus messinensis	Oleiphilaceae.191033	Oceanospirillales.135619	141452	1	fig|141451.6.peg.1100	fig|141451.6.peg.1097	same strand	Proline dehydrogenase (EC 1.5.5.2) / Delta-1-pyrroline-5-carboxylate dehydrogenase (EC 1.2.1.88)
Saccharospirillum impatiens	Saccharospirillaceae.255527	Oceanospirillales.135619	1.12323e+06	1	fig|1123228.4.peg.3164	fig|1123228.4.peg.3165	opposite strand	Nucleoside-diphosphate-sugar epimerases
Reinekea forsetii	Saccharospirillaceae.255527	Oceanospirillales.135619	1.33681e+06	1	fig|1336806.4.peg.2970	fig|1336806.4.peg.2968	opposite strand	Nucleoside-diphosphate-sugar epimerases
Gynuella sunshinyii	Saccharospirillaceae.255527	Oceanospirillales.135619	1.44551e+06	1	fig|1445510.6.peg.867	fig|1445510.6.peg.866	opposite strand	Nucleoside-diphosphate-sugar epimerases
Saccharospirillum mangrovi	Saccharospirillaceae.255527	Oceanospirillales.135619	2.16175e+06	1	fig|2161747.4.peg.3031	fig|2161747.4.peg.3030	opposite strand	Nucleoside-diphosphate-sugar epimerases
Reinekea marinisedimentorum	Saccharospirillaceae.255527	Oceanospirillales.135619	230495	1	fig|230495.4.peg.116	fig|230495.4.peg.117	opposite strand	Alkyl hydroperoxide reductase protein C (EC 1.11.1.15)
Reinekea blandensis	Saccharospirillaceae.255527	Oceanospirillales.135619	314284	1	fig|314283.5.peg.3606	fig|314283.5.peg.3605	opposite strand	Alkyl hydroperoxide reductase protein C (EC 1.11.1.15)
Schmidhempelia bombi	Orbaceae.1240483	Orbales.1240482	1.3872e+06	1	fig|1387197.9.peg.1446	fig|1387197.9.peg.1445	opposite strand	Uncharacterized proteins YbdD and YjiX
Gilliamella bombicola	Orbaceae.1240483	Orbales.1240482	1.79818e+06	1	fig|1798182.6.peg.906	fig|1798182.6.peg.905	opposite strand	Poly(A) polymerase (EC 2.7.7.19)
Gilliamella intestini	Orbaceae.1240483	Orbales.1240482	1.79818e+06	1	fig|1798183.8.peg.2320	fig|1798183.8.peg.2319	opposite strand	Poly(A) polymerase (EC 2.7.7.19)
Gilliamella mensalis	Orbaceae.1240483	Orbales.1240482	1.90852e+06	1	fig|1908520.3.peg.792	fig|1908520.3.peg.793	opposite strand	Poly(A) polymerase (EC 2.7.7.19)
Gilliamella bombi	Orbaceae.1240483	Orbales.1240482	1.90852e+06	1	fig|1908521.3.peg.1751	fig|1908521.3.peg.1750	opposite strand	Poly(A) polymerase (EC 2.7.7.19)
Gilliamella apis	Orbaceae.1240483	Orbales.1240482	1.97074e+06	1	fig|1970738.7.peg.253	fig|1970738.7.peg.255	opposite strand	Poly(A) polymerase (EC 2.7.7.19)
Frischella perrara	Orbaceae.1240483	Orbales.1240482	1.26702e+06	1	fig|1267021.3.peg.1703	fig|1267021.3.peg.1704	same strand	Argininosuccinate lyase (EC 4.3.2.1)
Orbus hercynius	Orbaceae.1240483	Orbales.1240482	593136	1	fig|593135.5.peg.1721	fig|593135.5.peg.1720	same strand	Argininosuccinate lyase (EC 4.3.2.1)
Otariodibacter oris	Pasteurellaceae.712	Pasteurellales.135625	1.03262e+06	1	fig|1032623.9.peg.327	fig|1032623.9.peg.326	opposite strand	Hybrid peroxiredoxin hyPrx5 (EC 1.11.1.15)
Haemophilus pittmaniae	Pasteurellaceae.712	Pasteurellales.135625	1.03519e+06	1	fig|1035188.3.peg.1364	fig|1035188.3.peg.1365	opposite strand	Peroxiredoxin family protein/glutaredoxin
Aggregatibacter actinomycetemcomitans	Pasteurellaceae.712	Pasteurellales.135625	1.03519e+06	1	fig|1035194.3.peg.1338	fig|1035194.3.peg.1337	opposite strand	Hybrid peroxiredoxin hyPrx5 (EC 1.11.1.15)
Pasteurella oralis	Pasteurellaceae.712	Pasteurellales.135625	1.07195e+06	1	fig|1071947.3.peg.1346	fig|1071947.3.peg.1345	opposite strand	Hybrid peroxiredoxin hyPrx5 (EC 1.11.1.15)
Haemophilus sputorum	Pasteurellaceae.712	Pasteurellales.135625	1.07848e+06	1	fig|1078483.3.peg.1500	fig|1078483.3.peg.1501	opposite strand	Hybrid peroxiredoxin hyPrx5 (EC 1.11.1.15)
Bisgaardia hudsonensis	Pasteurellaceae.712	Pasteurellales.135625	109472	1	fig|109472.3.peg.1760	fig|109472.3.peg.1761	opposite strand	Hybrid peroxiredoxin hyPrx5 (EC 1.11.1.15)
Haemophilus paraphrohaemolyticus	Pasteurellaceae.712	Pasteurellales.135625	1.09574e+06	1	fig|1095743.3.peg.1496	fig|1095743.3.peg.1495	opposite strand	Hybrid peroxiredoxin hyPrx5 (EC 1.11.1.15)
Pasteurella bettyae	Pasteurellaceae.712	Pasteurellales.135625	1.09575e+06	1	fig|1095749.3.peg.939	fig|1095749.3.peg.938	opposite strand	Hybrid peroxiredoxin hyPrx5 (EC 1.11.1.15)
Actinobacillus capsulatus	Pasteurellaceae.712	Pasteurellales.135625	1.12093e+06	1	fig|1120931.3.peg.728	fig|1120931.3.peg.730	opposite strand	Hybrid peroxiredoxin hyPrx5 (EC 1.11.1.15)
Mannheimia granulomatis	Pasteurellaceae.712	Pasteurellales.135625	1.12219e+06	1	fig|1122190.3.peg.1908	fig|1122190.3.peg.1909	opposite strand	Hybrid peroxiredoxin hyPrx5 (EC 1.11.1.15)
Pasteurella langaaensis	Pasteurellaceae.712	Pasteurellales.135625	1.12294e+06	1	fig|1122935.3.peg.1270	fig|1122935.3.peg.1269	opposite strand	Hybrid peroxiredoxin hyPrx5 (EC 1.11.1.15)
Pasteurella multocida	Pasteurellaceae.712	Pasteurellales.135625	1.16941e+06	1	fig|1169410.3.peg.508	fig|1169410.3.peg.509	opposite strand	Hybrid peroxiredoxin hyPrx5 (EC 1.11.1.15)
Actinobacillus rossii	Pasteurellaceae.712	Pasteurellales.135625	123820	1	fig|123820.3.peg.658	fig|123820.3.peg.657	opposite strand	Hybrid peroxiredoxin hyPrx5 (EC 1.11.1.15)
Haemophilus felis	Pasteurellaceae.712	Pasteurellales.135625	123823	1	fig|123822.8.peg.907	fig|123822.8.peg.906	opposite strand	Hybrid peroxiredoxin hyPrx5 (EC 1.11.1.15)
Frederiksenia canicola	Pasteurellaceae.712	Pasteurellales.135625	123824	1	fig|123824.4.peg.1125	fig|123824.4.peg.1124	opposite strand	UDP-N-acetylenolpyruvoylglucosamine reductase (EC 1.3.1.98)
Haemophilus quentini	Pasteurellaceae.712	Pasteurellales.135625	123834	1	fig|123834.4.peg.698	fig|123834.4.peg.697	opposite strand	Hybrid peroxiredoxin hyPrx5 (EC 1.11.1.15)
Mannheimia haemolytica	Pasteurellaceae.712	Pasteurellales.135625	1.26113e+06	1	fig|1261126.6.peg.1975	fig|1261126.6.peg.1976	opposite strand	Hybrid peroxiredoxin hyPrx5 (EC 1.11.1.15)
Avibacterium paragallinarum	Pasteurellaceae.712	Pasteurellales.135625	1.27897e+06	1	fig|1278971.3.peg.1879	fig|1278971.3.peg.1880	opposite strand	Hybrid peroxiredoxin hyPrx5 (EC 1.11.1.15)
Vespertiliibacter pulmonis	Pasteurellaceae.712	Pasteurellales.135625	1.44304e+06	1	fig|1443036.3.peg.1647	fig|1443036.3.peg.1648	opposite strand	UDP-N-acetylenolpyruvoylglucosamine reductase (EC 1.3.1.98)
Phocoenobacter uteri	Pasteurellaceae.712	Pasteurellales.135625	146806	1	fig|146806.3.peg.1713	fig|146806.3.peg.1714	opposite strand	Hybrid peroxiredoxin hyPrx5 (EC 1.11.1.15)
Mesocricetibacter intestinalis	Pasteurellaceae.712	Pasteurellales.135625	1.52193e+06	1	fig|1521930.3.peg.1262	fig|1521930.3.peg.1261	opposite strand	Hybrid peroxiredoxin hyPrx5 (EC 1.11.1.15)
Cricetibacter osteomyelitidis	Pasteurellaceae.712	Pasteurellales.135625	1.52193e+06	1	fig|1521931.3.peg.1483	fig|1521931.3.peg.1484	opposite strand	Hybrid peroxiredoxin hyPrx5 (EC 1.11.1.15)
Testudinibacter aquarius	Pasteurellaceae.712	Pasteurellales.135625	1.52497e+06	1	fig|1524974.3.peg.875	fig|1524974.3.peg.876	opposite strand	Porphobilinogen deaminase (EC 2.5.1.61)
Pasteurella caecimuris	Pasteurellaceae.712	Pasteurellales.135625	1.79664e+06	1	fig|1796644.5.peg.546	fig|1796644.5.peg.547	opposite strand	Hybrid peroxiredoxin hyPrx5 (EC 1.11.1.15)
Actinobacillus porcitonsillarum	Pasteurellaceae.712	Pasteurellales.135625	189834	1	fig|189834.15.peg.1023	fig|189834.15.peg.1024	opposite strand	Hybrid peroxiredoxin hyPrx5 (EC 1.11.1.15)
Rodentibacter heylii	Pasteurellaceae.712	Pasteurellales.135625	1.90674e+06	1	fig|1906744.4.peg.227	fig|1906744.4.peg.226	opposite strand	Hybrid peroxiredoxin hyPrx5 (EC 1.11.1.15)
Rodentibacter ratti	Pasteurellaceae.712	Pasteurellales.135625	1.90675e+06	1	fig|1906745.6.peg.453	fig|1906745.6.peg.452	opposite strand	Hybrid peroxiredoxin hyPrx5 (EC 1.11.1.15)
Rodentibacter myodis	Pasteurellaceae.712	Pasteurellales.135625	1.90794e+06	1	fig|1907939.3.peg.1873	fig|1907939.3.peg.1872	opposite strand	Hybrid peroxiredoxin hyPrx5 (EC 1.11.1.15)
Rodentibacter mrazii	Pasteurellaceae.712	Pasteurellales.135625	1.90826e+06	1	fig|1908257.3.peg.2008	fig|1908257.3.peg.2009	opposite strand	Hybrid peroxiredoxin hyPrx5 (EC 1.11.1.15)
Rodentibacter heidelbergensis	Pasteurellaceae.712	Pasteurellales.135625	1.90826e+06	1	fig|1908258.3.peg.142	fig|1908258.3.peg.143	opposite strand	Hybrid peroxiredoxin hyPrx5 (EC 1.11.1.15)
Rodentibacter rarus	Pasteurellaceae.712	Pasteurellales.135625	1.90826e+06	1	fig|1908260.3.peg.1527	fig|1908260.3.peg.1526	opposite strand	Hybrid peroxiredoxin hyPrx5 (EC 1.11.1.15)
Rodentibacter trehalosifermentans	Pasteurellaceae.712	Pasteurellales.135625	1.90826e+06	1	fig|1908263.4.peg.1724	fig|1908263.4.peg.1725	opposite strand	Hybrid peroxiredoxin hyPrx5 (EC 1.11.1.15)
Volucribacter psittacicida	Pasteurellaceae.712	Pasteurellales.135625	203482	1	fig|203482.3.peg.1855	fig|203482.3.peg.1854	opposite strand	Hybrid peroxiredoxin hyPrx5 (EC 1.11.1.15)
Mannheimia succiniciproducens	Pasteurellaceae.712	Pasteurellales.135625	221988	1	fig|221988.4.peg.146	fig|221988.4.peg.147	opposite strand	Hybrid peroxiredoxin hyPrx5 (EC 1.11.1.15)
Haemophilus somnus	Pasteurellaceae.712	Pasteurellales.135625	228401	1	fig|228400.7.peg.2031	fig|228400.7.peg.2030	opposite strand	Hybrid peroxiredoxin hyPrx5 (EC 1.11.1.15)
Actinobacillus vicugnae	Pasteurellaceae.712	Pasteurellales.135625	2.57309e+06	1	fig|2573093.3.peg.2353	fig|2573093.3.peg.2352	opposite strand	Hybrid peroxiredoxin hyPrx5 (EC 1.11.1.15)
Nicoletella semolina	Pasteurellaceae.712	Pasteurellales.135625	271160	1	fig|271160.3.peg.1867	fig|271160.3.peg.1868	opposite strand	Protein SprT
Avibacterium endocarditidis	Pasteurellaceae.712	Pasteurellales.135625	380675	1	fig|380674.9.peg.2505	fig|380674.9.peg.2506	opposite strand	Hybrid peroxiredoxin hyPrx5 (EC 1.11.1.15)
Bibersteinia trehalosi	Pasteurellaceae.712	Pasteurellales.135625	47735.2	1	fig|47735.17.peg.2111	fig|47735.17.peg.2110	opposite strand	UDP-N-acetylenolpyruvoylglucosamine reductase (EC 1.3.1.98)
Chelonobacter oris	Pasteurellaceae.712	Pasteurellales.135625	505317	1	fig|505317.4.peg.1775	fig|505317.4.peg.1774	opposite strand	Porphobilinogen deaminase (EC 2.5.1.61)
Actinobacillus porcinus	Pasteurellaceae.712	Pasteurellales.135625	51048.3	1	fig|51048.3.peg.1871	fig|51048.3.peg.1872	opposite strand	Hybrid peroxiredoxin hyPrx5 (EC 1.11.1.15)
Actinobacillus indolicus	Pasteurellaceae.712	Pasteurellales.135625	51049.6	1	fig|51049.6.peg.672	fig|51049.6.peg.673	opposite strand	Hybrid peroxiredoxin hyPrx5 (EC 1.11.1.15)
Actinobacillus delphinicola	Pasteurellaceae.712	Pasteurellales.135625	51161.3	1	fig|51161.3.peg.878	fig|51161.3.peg.877	opposite strand	Hybrid peroxiredoxin hyPrx5 (EC 1.11.1.15)
Lonepinella koalarum	Pasteurellaceae.712	Pasteurellales.135625	53417.4	1	fig|53417.4.peg.28	fig|53417.4.peg.29	opposite strand	Hybrid peroxiredoxin hyPrx5 (EC 1.11.1.15)
Actinobacillus minor	Pasteurellaceae.712	Pasteurellales.135625	591023	1	fig|591023.4.peg.1832	fig|591023.4.peg.1831	opposite strand	Hybrid peroxiredoxin hyPrx5 (EC 1.11.1.15)
Basfia succiniciproducens	Pasteurellaceae.712	Pasteurellales.135625	653940	1	fig|653940.3.peg.941	fig|653940.3.peg.942	opposite strand	Hybrid peroxiredoxin hyPrx5 (EC 1.11.1.15)
Pasteurella dagmatis	Pasteurellaceae.712	Pasteurellales.135625	667128	1	fig|667128.3.peg.912	fig|667128.3.peg.910	opposite strand	FKBP-type peptidyl-prolyl cis-trans isomerase FkpA precursor (EC 5.2.1.8)
Actinobacillus succinogenes	Pasteurellaceae.712	Pasteurellales.135625	67854.3	1	fig|67854.3.peg.682	fig|67854.3.peg.683	opposite strand	Hybrid peroxiredoxin hyPrx5 (EC 1.11.1.15)
Muribacter muris	Pasteurellaceae.712	Pasteurellales.135625	67855.5	1	fig|67855.5.peg.942	fig|67855.5.peg.941	opposite strand	Hybrid peroxiredoxin hyPrx5 (EC 1.11.1.15)
Aggregatibacter aphrophilus	Pasteurellaceae.712	Pasteurellales.135625	679198	1	fig|679198.3.peg.1891	fig|679198.3.peg.1892	opposite strand	Hybrid peroxiredoxin hyPrx5 (EC 1.11.1.15)
Actinobacillus equuli	Pasteurellaceae.712	Pasteurellales.135625	718.4	1	fig|718.4.peg.1401	fig|718.4.peg.1402	opposite strand	Hybrid peroxiredoxin hyPrx5 (EC 1.11.1.15)
Actinobacillus lignieresii	Pasteurellaceae.712	Pasteurellales.135625	720.4	1	fig|720.4.peg.1473	fig|720.4.peg.1472	opposite strand	Hybrid peroxiredoxin hyPrx5 (EC 1.11.1.15)
Actinobacillus ureae	Pasteurellaceae.712	Pasteurellales.135625	723.4	1	fig|723.4.peg.2106	fig|723.4.peg.2105	opposite strand	Hybrid peroxiredoxin hyPrx5 (EC 1.11.1.15)
Haemophilus influenzae	Pasteurellaceae.712	Pasteurellales.135625	727.229	1	fig|727.2293.peg.1269	fig|727.2293.peg.1270	opposite strand	Hybrid peroxiredoxin hyPrx5 (EC 1.11.1.15)
Haemophilus ducreyi	Pasteurellaceae.712	Pasteurellales.135625	730.36	1	fig|730.36.peg.1341	fig|730.36.peg.1342	opposite strand	Hybrid peroxiredoxin hyPrx5 (EC 1.11.1.15)
Histophilus somni	Pasteurellaceae.712	Pasteurellales.135625	731.58	1	fig|731.58.peg.1470	fig|731.58.peg.1471	opposite strand	Hybrid peroxiredoxin hyPrx5 (EC 1.11.1.15)
Haemophilus haemoglobinophilus	Pasteurellaceae.712	Pasteurellales.135625	733.4	1	fig|733.4.peg.958	fig|733.4.peg.957	opposite strand	Hybrid peroxiredoxin hyPrx5 (EC 1.11.1.15)
Haemophilus paracuniculus	Pasteurellaceae.712	Pasteurellales.135625	734.3	1	fig|734.3.peg.611	fig|734.3.peg.610	opposite strand	Hybrid peroxiredoxin hyPrx5 (EC 1.11.1.15)
Haemophilus parahaemolyticus	Pasteurellaceae.712	Pasteurellales.135625	735.1	1	fig|735.10.peg.97	fig|735.10.peg.96	opposite strand	Hybrid peroxiredoxin hyPrx5 (EC 1.11.1.15)
Actinobacillus suis	Pasteurellaceae.712	Pasteurellales.135625	743972	1	fig|743972.3.peg.2187	fig|743972.3.peg.2188	opposite strand	Hybrid peroxiredoxin hyPrx5 (EC 1.11.1.15)
Pasteurella aerogenes	Pasteurellaceae.712	Pasteurellales.135625	749.7	1	fig|749.7.peg.2012	fig|749.7.peg.2013	opposite strand	Hybrid peroxiredoxin hyPrx5 (EC 1.11.1.15)
Avibacterium avium	Pasteurellaceae.712	Pasteurellales.135625	751.5	1	fig|751.5.peg.456	fig|751.5.peg.457	opposite strand	Hybrid peroxiredoxin hyPrx5 (EC 1.11.1.15)
Avibacterium gallinarum	Pasteurellaceae.712	Pasteurellales.135625	755.7	1	fig|755.7.peg.1690	fig|755.7.peg.1689	opposite strand	Hybrid peroxiredoxin hyPrx5 (EC 1.11.1.15)
Pasteurella mairii	Pasteurellaceae.712	Pasteurellales.135625	757.3	1	fig|757.3.peg.2293	fig|757.3.peg.2294	opposite strand	Hybrid peroxiredoxin hyPrx5 (EC 1.11.1.15)
Rodentibacter pneumotropicus	Pasteurellaceae.712	Pasteurellales.135625	758.28	1	fig|758.28.peg.1411	fig|758.28.peg.1410	opposite strand	Hybrid peroxiredoxin hyPrx5 (EC 1.11.1.15)
Pasteurella pneumotropica	Pasteurellaceae.712	Pasteurellales.135625	758.7	1	fig|758.7.peg.639	fig|758.7.peg.640	opposite strand	Hybrid peroxiredoxin hyPrx5 (EC 1.11.1.15)
Pasteurella testudinis	Pasteurellaceae.712	Pasteurellales.135625	761.3	1	fig|761.3.peg.751	fig|761.3.peg.749	opposite strand	Porphobilinogen deaminase (EC 2.5.1.61)
Avibacterium volantium	Pasteurellaceae.712	Pasteurellales.135625	762.5	1	fig|762.5.peg.438	fig|762.5.peg.439	opposite strand	Hybrid peroxiredoxin hyPrx5 (EC 1.11.1.15)
Aggregatibacter segnis	Pasteurellaceae.712	Pasteurellales.135625	888057	1	fig|888057.3.peg.500	fig|888057.3.peg.499	opposite strand	Hybrid peroxiredoxin hyPrx5 (EC 1.11.1.15)
Haemophilus aegyptius	Pasteurellaceae.712	Pasteurellales.135625	888728	1	fig|888728.3.peg.256	fig|888728.3.peg.257	opposite strand	Hybrid peroxiredoxin hyPrx5 (EC 1.11.1.15)
Haemophilus parainfluenzae	Pasteurellaceae.712	Pasteurellales.135625	888828	1	fig|888828.3.peg.1761	fig|888828.3.peg.1762	opposite strand	Hybrid peroxiredoxin hyPrx5 (EC 1.11.1.15)
Necropsobacter rosorum	Pasteurellaceae.712	Pasteurellales.135625	908285	1	fig|908285.4.peg.2236	fig|908285.4.peg.2235	opposite strand	Hybrid peroxiredoxin hyPrx5 (EC 1.11.1.15)
Pasteurella skyensis	Pasteurellaceae.712	Pasteurellales.135625	97481.3	1	fig|97481.3.peg.210	fig|97481.3.peg.209	opposite strand	Hybrid peroxiredoxin hyPrx5 (EC 1.11.1.15)
Gallibacterium anatis	Pasteurellaceae.712	Pasteurellales.135625	1.12191e+06	1	fig|1121910.4.peg.163	fig|1121910.4.peg.161	same strand	Free methionine-(R)-sulfoxide reductase, contains GAF domain
Glaesserella parasuis	Pasteurellaceae.712	Pasteurellales.135625	456299	1	fig|456298.6.peg.241	fig|456298.6.peg.240	same strand	Putative permease
Gallibacterium salpingitidis	Pasteurellaceae.712	Pasteurellales.135625	505342	1	fig|505341.6.peg.2150	fig|505341.6.peg.2153	same strand	Methionine ABC transporter substrate-binding protein
Haemophilus parasuis	Pasteurellaceae.712	Pasteurellales.135625	557724	1	fig|557723.8.peg.1784	fig|557723.8.peg.1783	same strand	Putative permease
Mannheimia varigena	Pasteurellaceae.712	Pasteurellales.135625	85404.5	1	fig|85404.46.peg.1404	fig|85404.46.peg.1403	same strand	Tryptophanyl-tRNA synthetase (EC 6.1.1.2)
Mangrovitalea sediminis	Marinobacteraceae.2887365	Pseudomonadales.72274	1.98204e+06	1	fig|1982043.5.peg.356	fig|1982043.5.peg.357	opposite strand	Nucleoside-diphosphate-sugar epimerases
Psychrobacter pacificensis	Moraxellaceae.468	Pseudomonadales.72274	112002	1	fig|112002.5.peg.2187	fig|112002.5.peg.2188	opposite strand	Alkyl hydroperoxide reductase protein C (EC 1.11.1.15)
Moraxella boevrei	Moraxellaceae.468	Pseudomonadales.72274	1.12224e+06	1	fig|1122243.3.peg.972	fig|1122243.3.peg.971	opposite strand	Alkyl hydroperoxide reductase protein C (EC 1.11.1.15)
Moraxella cuniculi	Moraxellaceae.468	Pseudomonadales.72274	1.12225e+06	1	fig|1122245.3.peg.1189	fig|1122245.3.peg.1188	opposite strand	Alkyl hydroperoxide reductase protein C (EC 1.11.1.15)
Psychrobacter lutiphocae	Moraxellaceae.468	Pseudomonadales.72274	1.12303e+06	1	fig|1123033.3.peg.702	fig|1123033.3.peg.701	opposite strand	Alkyl hydroperoxide reductase protein C (EC 1.11.1.15)
Psychrobacter phenylpyruvicus	Moraxellaceae.468	Pseudomonadales.72274	1.12303e+06	1	fig|1123034.3.peg.1929	fig|1123034.3.peg.1930	opposite strand	Alkyl hydroperoxide reductase protein C (EC 1.11.1.15)
Moraxella macacae	Moraxellaceae.468	Pseudomonadales.72274	1.23034e+06	1	fig|1230338.3.peg.42	fig|1230338.3.peg.40	opposite strand	Alkyl hydroperoxide reductase protein C (EC 1.11.1.15)
Moraxella oblonga	Moraxellaceae.468	Pseudomonadales.72274	1.34978e+06	1	fig|1349775.3.peg.2481	fig|1349775.3.peg.2482	opposite strand	hypothetical protein
Psychrobacter aquaticus	Moraxellaceae.468	Pseudomonadales.72274	1.3543e+06	1	fig|1354303.4.peg.1081	fig|1354303.4.peg.1082	opposite strand	Alkyl hydroperoxide reductase protein C (EC 1.11.1.15)
Psychrobacter proteolyticus	Moraxellaceae.468	Pseudomonadales.72274	147825	1	fig|147825.4.peg.2080	fig|147825.4.peg.2079	opposite strand	Alkyl hydroperoxide reductase protein C (EC 1.11.1.15)
Psychrobacter fozii	Moraxellaceae.468	Pseudomonadales.72274	198481	1	fig|198480.6.peg.2508	fig|198480.6.peg.2507	opposite strand	Alkyl hydroperoxide reductase protein C (EC 1.11.1.15)
Psychrobacter arcticus	Moraxellaceae.468	Pseudomonadales.72274	259536	1	fig|259536.19.peg.2117	fig|259536.19.peg.2116	opposite strand	Alkyl hydroperoxide reductase protein C (EC 1.11.1.15)
Psychrobacter alimentarius	Moraxellaceae.468	Pseudomonadales.72274	261164	1	fig|261164.3.peg.2430	fig|261164.3.peg.2429	opposite strand	Alkyl hydroperoxide reductase protein C (EC 1.11.1.15)
Psychrobacter nivimaris	Moraxellaceae.468	Pseudomonadales.72274	281738	1	fig|281738.12.peg.947	fig|281738.12.peg.946	opposite strand	Alkyl hydroperoxide reductase protein C (EC 1.11.1.15)
Moraxella ovis	Moraxellaceae.468	Pseudomonadales.72274	29433.3	1	fig|29433.3.peg.345	fig|29433.3.peg.346	opposite strand	Alkyl hydroperoxide reductase protein C (EC 1.11.1.15)
Psychrobacter cryohalolentis	Moraxellaceae.468	Pseudomonadales.72274	335285	1	fig|335284.6.peg.2204	fig|335284.6.peg.2203	opposite strand	Alkyl hydroperoxide reductase protein C (EC 1.11.1.15)
Moraxella atlantae	Moraxellaceae.468	Pseudomonadales.72274	34059.8	1	fig|34059.8.peg.1903	fig|34059.8.peg.1901	opposite strand	Alkyl hydroperoxide reductase protein C (EC 1.11.1.15)
Moraxella caviae	Moraxellaceae.468	Pseudomonadales.72274	34060.4	1	fig|34060.4.peg.2424	fig|34060.4.peg.2423	opposite strand	Alkyl hydroperoxide reductase protein C (EC 1.11.1.15)
Moraxella osloensis	Moraxellaceae.468	Pseudomonadales.72274	34062.3	1	fig|34062.3.peg.2012	fig|34062.3.peg.2013	opposite strand	Alkyl hydroperoxide reductase protein C (EC 1.11.1.15)
Psychrobacter urativorans	Moraxellaceae.468	Pseudomonadales.72274	45610.4	1	fig|45610.4.peg.932	fig|45610.4.peg.931	opposite strand	Alkyl hydroperoxide reductase protein C (EC 1.11.1.15)
Psychrobacter frigidicola	Moraxellaceae.468	Pseudomonadales.72274	45611.3	1	fig|45611.3.peg.2011	fig|45611.3.peg.2012	opposite strand	Alkyl hydroperoxide reductase protein C (EC 1.11.1.15)
Moraxella pluranimalium	Moraxellaceae.468	Pseudomonadales.72274	470453	1	fig|470453.3.peg.1154	fig|470453.3.peg.1153	opposite strand	Alkyl hydroperoxide reductase protein C (EC 1.11.1.15)
Moraxella bovis	Moraxellaceae.468	Pseudomonadales.72274	476.1	1	fig|476.10.peg.2892	fig|476.10.peg.2893	opposite strand	Alkyl hydroperoxide reductase protein C (EC 1.11.1.15)
Moraxella lacunata	Moraxellaceae.468	Pseudomonadales.72274	477.12	1	fig|477.12.peg.3319	fig|477.12.peg.3318	opposite strand	Alkyl hydroperoxide reductase protein C (EC 1.11.1.15)
Moraxella nonliquefaciens	Moraxellaceae.468	Pseudomonadales.72274	478.6	1	fig|478.6.peg.820	fig|478.6.peg.821	opposite strand	Alkyl hydroperoxide reductase protein C (EC 1.11.1.15)
Psychrobacter immobilis	Moraxellaceae.468	Pseudomonadales.72274	498.5	1	fig|498.5.peg.2033	fig|498.5.peg.2032	opposite strand	Alkyl hydroperoxide reductase protein C (EC 1.11.1.15)
Psychrobacter piscatorii	Moraxellaceae.468	Pseudomonadales.72274	554343	1	fig|554343.3.peg.2242	fig|554343.3.peg.2243	opposite strand	Alkyl hydroperoxide reductase protein C (EC 1.11.1.15)
Psychrobacter glacincola	Moraxellaceae.468	Pseudomonadales.72274	56810.4	1	fig|56810.4.peg.1690	fig|56810.4.peg.1689	opposite strand	Alkyl hydroperoxide reductase protein C (EC 1.11.1.15)
Moraxella porci	Moraxellaceae.468	Pseudomonadales.72274	573983	1	fig|573983.3.peg.1524	fig|573983.3.peg.1523	opposite strand	Alkyl hydroperoxide reductase protein C (EC 1.11.1.15)
Moraxella equi	Moraxellaceae.468	Pseudomonadales.72274	60442.4	1	fig|60442.4.peg.2870	fig|60442.4.peg.2869	opposite strand	Alkyl hydroperoxide reductase protein C (EC 1.11.1.15)
Moraxella bovoculi	Moraxellaceae.468	Pseudomonadales.72274	743974	1	fig|743974.3.peg.659	fig|743974.3.peg.660	opposite strand	Alkyl hydroperoxide reductase protein C (EC 1.11.1.15)
Paraperlucidibaca baekdonensis	Moraxellaceae.468	Pseudomonadales.72274	748120	1	fig|748120.3.peg.349	fig|748120.3.peg.350	opposite strand	Nucleoside-diphosphate-sugar epimerases
Moraxella catarrhalis	Moraxellaceae.468	Pseudomonadales.72274	857572	1	fig|857572.3.peg.101	fig|857572.3.peg.100	opposite strand	Alkyl hydroperoxide reductase protein C (EC 1.11.1.15)
Moraxella canis	Moraxellaceae.468	Pseudomonadales.72274	90239.3	1	fig|90239.3.peg.2002	fig|90239.3.peg.2003	opposite strand	Alkyl hydroperoxide reductase protein C (EC 1.11.1.15)
Moraxella caprae	Moraxellaceae.468	Pseudomonadales.72274	90240.3	1	fig|90240.3.peg.321	fig|90240.3.peg.322	opposite strand	Alkyl hydroperoxide reductase protein C (EC 1.11.1.15)
Moraxella lincolnii	Moraxellaceae.468	Pseudomonadales.72274	90241.3	1	fig|90241.3.peg.2026	fig|90241.3.peg.2027	opposite strand	Lysine decarboxylase family
Acinetobacter puyangensis	Moraxellaceae.468	Pseudomonadales.72274	1.09678e+06	1	fig|1096779.3.peg.1020	fig|1096779.3.peg.1021	same strand	Hydrolase, alpha/beta fold family
Acinetobacter baylyi	Moraxellaceae.468	Pseudomonadales.72274	1.12092e+06	1	fig|1120924.3.peg.82	fig|1120924.3.peg.81	same strand	Hydrolase, alpha/beta fold family
Acinetobacter bouvetii	Moraxellaceae.468	Pseudomonadales.72274	1.12093e+06	1	fig|1120925.4.peg.154	fig|1120925.4.peg.155	same strand	Hydrolase, alpha/beta fold family
Acinetobacter gerneri	Moraxellaceae.468	Pseudomonadales.72274	1.12093e+06	1	fig|1120926.3.peg.753	fig|1120926.3.peg.752	same strand	Hydrolase, alpha/beta fold family
Acinetobacter towneri	Moraxellaceae.468	Pseudomonadales.72274	1.12093e+06	1	fig|1120929.3.peg.630	fig|1120929.3.peg.629	same strand	Hydrolase, alpha/beta fold family
Alkanindiges illinoisensis	Moraxellaceae.468	Pseudomonadales.72274	1.12098e+06	1	fig|1120977.3.peg.1227	fig|1120977.3.peg.1226	same strand	Hydrolase, alpha/beta fold family
Acinetobacter nosocomialis	Moraxellaceae.468	Pseudomonadales.72274	1.14713e+06	1	fig|1147131.5.peg.2892	fig|1147131.5.peg.2893	same strand	Hydrolase, alpha/beta fold family
Acinetobacter pittii	Moraxellaceae.468	Pseudomonadales.72274	1.14713e+06	1	fig|1147132.5.peg.91	fig|1147132.5.peg.92	same strand	Hydrolase, alpha/beta fold family
Acinetobacter venetianus	Moraxellaceae.468	Pseudomonadales.72274	1.19146e+06	1	fig|1191460.12.peg.2541	fig|1191460.12.peg.2540	same strand	Hydrolase, alpha/beta fold family
Acinetobacter beijerinckii	Moraxellaceae.468	Pseudomonadales.72274	1.21765e+06	1	fig|1217648.3.peg.389	fig|1217648.3.peg.390	same strand	Hydrolase, alpha/beta fold family
Acinetobacter guillouiae	Moraxellaceae.468	Pseudomonadales.72274	1.21766e+06	1	fig|1217655.3.peg.369	fig|1217655.3.peg.368	same strand	Hydrolase, alpha/beta fold family
Acinetobacter indicus	Moraxellaceae.468	Pseudomonadales.72274	1.21766e+06	1	fig|1217660.3.peg.1651	fig|1217660.3.peg.1650	same strand	Hydrolase, alpha/beta fold family
Acinetobacter johnsonii	Moraxellaceae.468	Pseudomonadales.72274	1.21766e+06	1	fig|1217662.6.peg.1629	fig|1217662.6.peg.1628	same strand	Hydrolase, alpha/beta fold family
Acinetobacter radioresistens	Moraxellaceae.468	Pseudomonadales.72274	1.21767e+06	1	fig|1217674.4.peg.2350	fig|1217674.4.peg.2351	same strand	Hydrolase, alpha/beta fold family
Acinetobacter soli	Moraxellaceae.468	Pseudomonadales.72274	1.21768e+06	1	fig|1217676.3.peg.1309	fig|1217676.3.peg.1310	same strand	Hydrolase, alpha/beta fold family
Acinetobacter ursingii	Moraxellaceae.468	Pseudomonadales.72274	1.21772e+06	1	fig|1217716.3.peg.1670	fig|1217716.3.peg.1671	same strand	Hydrolase, alpha/beta fold family
Acinetobacter schindleri	Moraxellaceae.468	Pseudomonadales.72274	1.21799e+06	1	fig|1217988.3.peg.1843	fig|1217988.3.peg.1844	same strand	Hydrolase, alpha/beta fold family
Acinetobacter boissieri	Moraxellaceae.468	Pseudomonadales.72274	1.21938e+06	1	fig|1219383.3.peg.1116	fig|1219383.3.peg.1117	same strand	Hydrolase, alpha/beta fold family
Acinetobacter kookii	Moraxellaceae.468	Pseudomonadales.72274	1.22633e+06	1	fig|1226327.3.peg.840	fig|1226327.3.peg.839	same strand	Hydrolase, alpha/beta fold family
Acinetobacter apis	Moraxellaceae.468	Pseudomonadales.72274	1.22917e+06	1	fig|1229165.4.peg.1270	fig|1229165.4.peg.1269	same strand	Hydrolase, alpha/beta fold family
Acinetobacter qingfengensis	Moraxellaceae.468	Pseudomonadales.72274	1.26259e+06	1	fig|1262585.11.peg.872	fig|1262585.11.peg.871	same strand	Hydrolase, alpha/beta fold family
Acinetobacter brisouii	Moraxellaceae.468	Pseudomonadales.72274	1.34168e+06	1	fig|1341683.3.peg.781	fig|1341683.3.peg.782	same strand	Hydrolase, alpha/beta fold family
Acinetobacter gyllenbergii	Moraxellaceae.468	Pseudomonadales.72274	134534	1	fig|134534.13.peg.1799	fig|134534.13.peg.1798	same strand	Hydrolase, alpha/beta fold family
Acinetobacter harbinensis	Moraxellaceae.468	Pseudomonadales.72274	1.35394e+06	1	fig|1353941.3.peg.2037	fig|1353941.3.peg.2036	same strand	Hydrolase, alpha/beta fold family
Acinetobacter nectaris	Moraxellaceae.468	Pseudomonadales.72274	1.39254e+06	1	fig|1392540.3.peg.119	fig|1392540.3.peg.120	same strand	Hydrolase, alpha/beta fold family
Acinetobacter bohemicus	Moraxellaceae.468	Pseudomonadales.72274	1.43504e+06	1	fig|1435036.3.peg.1855	fig|1435036.3.peg.1856	same strand	Hydrolase, alpha/beta fold family
Acinetobacter gandensis	Moraxellaceae.468	Pseudomonadales.72274	1.44394e+06	1	fig|1443941.3.peg.524	fig|1443941.3.peg.525	same strand	Hydrolase, alpha/beta fold family
Acinetobacter seifertii	Moraxellaceae.468	Pseudomonadales.72274	1.53012e+06	1	fig|1530123.6.peg.1879	fig|1530123.6.peg.1878	same strand	Hydrolase, alpha/beta fold family
Acinetobacter populi	Moraxellaceae.468	Pseudomonadales.72274	1.58227e+06	1	fig|1582270.3.peg.2145	fig|1582270.3.peg.2144	same strand	Hydrolase, alpha/beta fold family
Acinetobacter albensis	Moraxellaceae.468	Pseudomonadales.72274	1.67361e+06	1	fig|1673609.3.peg.2510	fig|1673609.3.peg.2509	same strand	Hydrolase, alpha/beta fold family
Acinetobacter halotolerans	Moraxellaceae.468	Pseudomonadales.72274	1.75208e+06	1	fig|1752076.3.peg.1379	fig|1752076.3.peg.1380	same strand	Hydrolase, alpha/beta fold family
Acinetobacter proteolyticus	Moraxellaceae.468	Pseudomonadales.72274	1.77674e+06	1	fig|1776741.5.peg.2424	fig|1776741.5.peg.2423	same strand	Hydrolase, alpha/beta fold family
Acinetobacter lactucae	Moraxellaceae.468	Pseudomonadales.72274	1.78513e+06	1	fig|1785128.4.peg.2789	fig|1785128.4.peg.2788	same strand	Hydrolase, alpha/beta fold family
Acinetobacter defluvii	Moraxellaceae.468	Pseudomonadales.72274	1.87111e+06	1	fig|1871111.5.peg.1275	fig|1871111.5.peg.1276	same strand	Hydrolase, alpha/beta fold family
Acinetobacter wuhouensis	Moraxellaceae.468	Pseudomonadales.72274	1.87905e+06	1	fig|1879050.7.peg.3224	fig|1879050.7.peg.3223	same strand	Hydrolase, alpha/beta fold family
Acinetobacter piscicola	Moraxellaceae.468	Pseudomonadales.72274	2.00612e+06	1	fig|2006115.4.peg.747	fig|2006115.4.peg.748	same strand	Hydrolase, alpha/beta fold family
Acinetobacter tandoii	Moraxellaceae.468	Pseudomonadales.72274	202955	1	fig|202954.8.peg.167	fig|202954.8.peg.168	same strand	Hydrolase, alpha/beta fold family
Acinetobacter tjernbergiae	Moraxellaceae.468	Pseudomonadales.72274	202955	1	fig|202955.4.peg.3291	fig|202955.4.peg.3292	same strand	Hydrolase, alpha/beta fold family
Acinetobacter cumulans	Moraxellaceae.468	Pseudomonadales.72274	2.13618e+06	1	fig|2136182.4.peg.683	fig|2136182.4.peg.682	same strand	Hydrolase, alpha/beta fold family
Acinetobacter colistiniresistens	Moraxellaceae.468	Pseudomonadales.72274	280145	1	fig|280145.10.peg.1345	fig|280145.10.peg.1346	same strand	Hydrolase, alpha/beta fold family
Acinetobacter courvalinii	Moraxellaceae.468	Pseudomonadales.72274	280147	1	fig|280147.3.peg.3132	fig|280147.3.peg.3131	same strand	Hydrolase, alpha/beta fold family
Acinetobacter marinus	Moraxellaceae.468	Pseudomonadales.72274	281375	1	fig|281375.3.peg.1913	fig|281375.3.peg.1914	same strand	Hydrolase, alpha/beta fold family
Acinetobacter rudis	Moraxellaceae.468	Pseudomonadales.72274	421052	1	fig|421052.3.peg.867	fig|421052.3.peg.868	same strand	Hydrolase, alpha/beta fold family
Acinetobacter oleivorans	Moraxellaceae.468	Pseudomonadales.72274	436717	1	fig|436717.3.peg.2848	fig|436717.3.peg.2847	same strand	Hydrolase, alpha/beta fold family
Acinetobacter baumannii	Moraxellaceae.468	Pseudomonadales.72274	470.925	1	fig|470.9250.peg.2768	fig|470.9250.peg.2767	same strand	Hydrolase, alpha/beta fold family
Acinetobacter junii	Moraxellaceae.468	Pseudomonadales.72274	575587	1	fig|575587.3.peg.1373	fig|575587.3.peg.1372	same strand	Hydrolase, alpha/beta fold family
Acinetobacter kyonggiensis	Moraxellaceae.468	Pseudomonadales.72274	595670	1	fig|595670.3.peg.1293	fig|595670.3.peg.1294	same strand	Hydrolase, alpha/beta fold family
Acinetobacter variabilis	Moraxellaceae.468	Pseudomonadales.72274	70346.3	1	fig|70346.3.peg.1337	fig|70346.3.peg.1336	same strand	Hydrolase, alpha/beta fold family
Acinetobacter dispersus	Moraxellaceae.468	Pseudomonadales.72274	70348.3	1	fig|70348.3.peg.268	fig|70348.3.peg.269	same strand	Hydrolase, alpha/beta fold family
Acinetobacter haemolyticus	Moraxellaceae.468	Pseudomonadales.72274	707232	1	fig|707232.3.peg.774	fig|707232.3.peg.773	same strand	Hydrolase, alpha/beta fold family
Acinetobacter bereziniae	Moraxellaceae.468	Pseudomonadales.72274	981324	1	fig|981324.3.peg.1002	fig|981324.3.peg.1003	same strand	Hydrolase, alpha/beta fold family
Acinetobacter lwoffii	Moraxellaceae.468	Pseudomonadales.72274	981328	1	fig|981327.6.peg.1521	fig|981327.6.peg.1522	same strand	Hydrolase, alpha/beta fold family
Acinetobacter calcoaceticus	Moraxellaceae.468	Pseudomonadales.72274	981332	1	fig|981331.5.peg.2908	fig|981331.5.peg.2907	same strand	Hydrolase, alpha/beta fold family
Acinetobacter parvus	Moraxellaceae.468	Pseudomonadales.72274	981334	1	fig|981333.9.peg.778	fig|981333.9.peg.777	same strand	Hydrolase, alpha/beta fold family
Pseudomonas formosensis	Pseudomonadaceae.135621	Pseudomonadales.72274	1.00253e+06	1	fig|1002526.5.peg.481	fig|1002526.5.peg.480	opposite strand	Nucleoside-diphosphate-sugar epimerases
Pseudomonas balearica	Pseudomonadaceae.135621	Pseudomonadales.72274	1.12302e+06	1	fig|1123016.6.peg.109	fig|1123016.6.peg.108	opposite strand	Nucleoside-diphosphate-sugar epimerases
Pseudomonas zhaodongensis	Pseudomonadaceae.135621	Pseudomonadales.72274	1.17626e+06	1	fig|1176257.6.peg.4070	fig|1176257.6.peg.4071	opposite strand	Nucleoside-diphosphate-sugar epimerases
Pseudomonas songnenensis	Pseudomonadaceae.135621	Pseudomonadales.72274	1.17626e+06	1	fig|1176259.3.peg.2553	fig|1176259.3.peg.2552	opposite strand	Nucleoside-diphosphate-sugar epimerases
Pseudomonas mendocina	Pseudomonadaceae.135621	Pseudomonadales.72274	1.19772e+06	1	fig|1197721.3.peg.1530	fig|1197721.3.peg.1529	opposite strand	Nucleoside-diphosphate-sugar epimerases
Pseudomonas guguanensis	Pseudomonadaceae.135621	Pseudomonadales.72274	1.19846e+06	1	fig|1198456.3.peg.2204	fig|1198456.3.peg.2203	opposite strand	Nucleoside-diphosphate-sugar epimerases
Pseudomonas kunmingensis	Pseudomonadaceae.135621	Pseudomonadales.72274	1.21181e+06	1	fig|1211807.3.peg.3031	fig|1211807.3.peg.3032	opposite strand	Nucleoside-diphosphate-sugar epimerases
Pseudomonas alcaliphila	Pseudomonadaceae.135621	Pseudomonadales.72274	1.21509e+06	1	fig|1215093.3.peg.2185	fig|1215093.3.peg.2184	opposite strand	Nucleoside-diphosphate-sugar epimerases
Pseudomonas citronellolis	Pseudomonadaceae.135621	Pseudomonadales.72274	1.2151e+06	1	fig|1215097.3.peg.4990	fig|1215097.3.peg.4989	opposite strand	Nucleoside-diphosphate-sugar epimerases
Pseudomonas indica	Pseudomonadaceae.135621	Pseudomonadales.72274	1.2151e+06	1	fig|1215103.3.peg.439	fig|1215103.3.peg.438	opposite strand	Nucleoside-diphosphate-sugar epimerases
Pseudomonas guangdongensis	Pseudomonadaceae.135621	Pseudomonadales.72274	1.24553e+06	1	fig|1245526.3.peg.936	fig|1245526.3.peg.935	opposite strand	Nucleoside-diphosphate-sugar epimerases
Pseudomonas chloritidismutans	Pseudomonadaceae.135621	Pseudomonadales.72274	1.26387e+06	1	fig|1263865.4.peg.2494	fig|1263865.4.peg.2493	opposite strand	Nucleoside-diphosphate-sugar epimerases
Pseudomonas azotifigens	Pseudomonadaceae.135621	Pseudomonadales.72274	1.29203e+06	1	fig|1292027.3.peg.4035	fig|1292027.3.peg.4036	opposite strand	Nucleoside-diphosphate-sugar epimerases
Pseudomonas denitrificans	Pseudomonadaceae.135621	Pseudomonadales.72274	1.29414e+06	1	fig|1294143.3.peg.4931	fig|1294143.3.peg.4930	opposite strand	Nucleoside-diphosphate-sugar epimerases
Pseudomonas knackmussii	Pseudomonadaceae.135621	Pseudomonadales.72274	1.3011e+06	1	fig|1301098.3.peg.5657	fig|1301098.3.peg.5656	opposite strand	Nucleoside-diphosphate-sugar epimerases
Pseudomonas pelagia	Pseudomonadaceae.135621	Pseudomonadales.72274	1.32366e+06	1	fig|1323663.3.peg.201	fig|1323663.3.peg.202	opposite strand	Nucleoside-diphosphate-sugar epimerases
Azotobacter chroococcum	Pseudomonadaceae.135621	Pseudomonadales.72274	1.32831e+06	1	fig|1328314.4.peg.381	fig|1328314.4.peg.382	opposite strand	Nucleoside-diphosphate-sugar epimerases
Pseudomonas flectens	Pseudomonadaceae.135621	Pseudomonadales.72274	1.33624e+06	1	fig|1336237.3.peg.1603	fig|1336237.3.peg.1604	opposite strand	Hybrid peroxiredoxin hyPrx5 (EC 1.11.1.15)
Pseudomonas taeanensis	Pseudomonadaceae.135621	Pseudomonadales.72274	1.39557e+06	1	fig|1395571.3.peg.749	fig|1395571.3.peg.750	opposite strand	Nucleoside-diphosphate-sugar epimerases
Pseudomonas hussainii	Pseudomonadaceae.135621	Pseudomonadales.72274	1.42908e+06	1	fig|1429083.3.peg.143	fig|1429083.3.peg.144	opposite strand	Nucleoside-diphosphate-sugar epimerases
Pseudomonas saudiphocaensis	Pseudomonadaceae.135621	Pseudomonadales.72274	1.49969e+06	1	fig|1499686.5.peg.1871	fig|1499686.5.peg.1870	opposite strand	Nucleoside-diphosphate-sugar epimerases
Thiopseudomonas denitrificans	Pseudomonadaceae.135621	Pseudomonadales.72274	1.50143e+06	1	fig|1501432.4.peg.1240	fig|1501432.4.peg.1239	opposite strand	hypothetical protein
Azotobacter beijerinckii	Pseudomonadaceae.135621	Pseudomonadales.72274	170624	1	fig|170623.6.peg.817	fig|170623.6.peg.818	opposite strand	Nucleoside-diphosphate-sugar epimerases
Pseudomonas oceani	Pseudomonadaceae.135621	Pseudomonadales.72274	1.70878e+06	1	fig|1708783.3.peg.208	fig|1708783.3.peg.207	opposite strand	Nucleoside-diphosphate-sugar epimerases
Pseudomonas yangmingensis	Pseudomonadaceae.135621	Pseudomonadales.72274	1.72006e+06	1	fig|1720063.3.peg.1898	fig|1720063.3.peg.1897	opposite strand	Nucleoside-diphosphate-sugar epimerases
Pseudomonas profundi	Pseudomonadaceae.135621	Pseudomonadales.72274	1.98151e+06	1	fig|1981513.3.peg.2287	fig|1981513.3.peg.2286	opposite strand	Nucleoside-diphosphate-sugar epimerases
Pseudomonas jinjuensis	Pseudomonadaceae.135621	Pseudomonadales.72274	198617	1	fig|198616.7.peg.114	fig|198616.7.peg.115	opposite strand	Nucleoside-diphosphate-sugar epimerases
Pseudomonas aeruginosa	Pseudomonadaceae.135621	Pseudomonadales.72274	208964	1	fig|208964.12.peg.5600	fig|208964.12.peg.5598	opposite strand	Nucleoside-diphosphate-sugar epimerases
Pseudomonas psychrotolerans	Pseudomonadaceae.135621	Pseudomonadales.72274	237610	1	fig|237610.19.peg.961	fig|237610.19.peg.962	opposite strand	Nucleoside-diphosphate-sugar epimerases
Pseudomonas nitrititolerans	Pseudomonadaceae.135621	Pseudomonadales.72274	2.48275e+06	1	fig|2482751.5.peg.2996	fig|2482751.5.peg.2997	opposite strand	Nucleoside-diphosphate-sugar epimerases
Pseudomonas pachastrellae	Pseudomonadaceae.135621	Pseudomonadales.72274	254162	1	fig|254161.7.peg.2465	fig|254161.7.peg.2464	opposite strand	Nucleoside-diphosphate-sugar epimerases
Pseudomonas xanthomarina	Pseudomonadaceae.135621	Pseudomonadales.72274	271421	1	fig|271420.6.peg.494	fig|271420.6.peg.495	opposite strand	Nucleoside-diphosphate-sugar epimerases
Pseudomonas borbori	Pseudomonadaceae.135621	Pseudomonadales.72274	289003	1	fig|289003.4.peg.3180	fig|289003.4.peg.3181	opposite strand	Nucleoside-diphosphate-sugar epimerases
Pseudomonas segetis	Pseudomonadaceae.135621	Pseudomonadales.72274	298908	1	fig|298908.3.peg.1941	fig|298908.3.peg.1942	opposite strand	Nucleoside-diphosphate-sugar epimerases
Azotobacter vinelandii	Pseudomonadaceae.135621	Pseudomonadales.72274	322710	1	fig|322710.5.peg.4587	fig|322710.5.peg.4586	opposite strand	Nucleoside-diphosphate-sugar epimerases
Pseudomonas pohangensis	Pseudomonadaceae.135621	Pseudomonadales.72274	364197	1	fig|364197.3.peg.3482	fig|364197.3.peg.3483	opposite strand	Nucleoside-diphosphate-sugar epimerases
Pseudomonas delhiensis	Pseudomonadaceae.135621	Pseudomonadales.72274	366289	1	fig|366289.4.peg.3148	fig|366289.4.peg.3149	opposite strand	Nucleoside-diphosphate-sugar epimerases
Pseudomonas stutzeri	Pseudomonadaceae.135621	Pseudomonadales.72274	379732	1	fig|379731.5.peg.142	fig|379731.5.peg.143	opposite strand	Nucleoside-diphosphate-sugar epimerases
Pseudomonas indoloxydans	Pseudomonadaceae.135621	Pseudomonadales.72274	404407	1	fig|404407.3.peg.1231	fig|404407.3.peg.1230	opposite strand	Nucleoside-diphosphate-sugar epimerases
Pseudomonas guineae	Pseudomonadaceae.135621	Pseudomonadales.72274	425504	1	fig|425504.4.peg.3439	fig|425504.4.peg.3438	opposite strand	NADH ubiquinone oxidoreductase chain A (EC 1.6.5.3)
Pseudomonas panipatensis	Pseudomonadaceae.135621	Pseudomonadales.72274	428992	1	fig|428992.5.peg.437	fig|428992.5.peg.438	opposite strand	Nucleoside-diphosphate-sugar epimerases
Pseudomonas marincola	Pseudomonadaceae.135621	Pseudomonadales.72274	437900	1	fig|437900.5.peg.1760	fig|437900.5.peg.1761	opposite strand	Nucleoside-diphosphate-sugar epimerases
Pseudomonas nitroreducens	Pseudomonadaceae.135621	Pseudomonadales.72274	46680.1	1	fig|46680.10.peg.4111	fig|46680.10.peg.4110	opposite strand	Nucleoside-diphosphate-sugar epimerases
Pseudomonas sabulinigri	Pseudomonadaceae.135621	Pseudomonadales.72274	472181	1	fig|472181.4.peg.2529	fig|472181.4.peg.2530	opposite strand	Nucleoside-diphosphate-sugar epimerases
Pseudomonas oryzihabitans	Pseudomonadaceae.135621	Pseudomonadales.72274	47885.3	1	fig|47885.30.peg.1722	fig|47885.30.peg.1723	opposite strand	Nucleoside-diphosphate-sugar epimerases
Pseudomonas xinjiangensis	Pseudomonadaceae.135621	Pseudomonadales.72274	487184	1	fig|487184.3.peg.2833	fig|487184.3.peg.2832	opposite strand	Nucleoside-diphosphate-sugar epimerases
Pseudomonas chengduensis	Pseudomonadaceae.135621	Pseudomonadales.72274	489632	1	fig|489632.16.peg.5030	fig|489632.16.peg.5029	opposite strand	Nucleoside-diphosphate-sugar epimerases
Pseudomonas caeni	Pseudomonadaceae.135621	Pseudomonadales.72274	521719	1	fig|521719.3.peg.2444	fig|521719.3.peg.2443	opposite strand	Nucleoside-diphosphate-sugar epimerases
Pseudomonas anguilliseptica	Pseudomonadaceae.135621	Pseudomonadales.72274	53406.4	1	fig|53406.4.peg.2214	fig|53406.4.peg.2215	opposite strand	NADH ubiquinone oxidoreductase chain A (EC 1.6.5.3)
Pseudomonas cuatrocienegasensis	Pseudomonadaceae.135621	Pseudomonadales.72274	543360	1	fig|543360.4.peg.2226	fig|543360.4.peg.2225	opposite strand	Nucleoside-diphosphate-sugar epimerases
Pseudomonas toyotomiensis	Pseudomonadaceae.135621	Pseudomonadales.72274	554344	1	fig|554344.10.peg.2171	fig|554344.10.peg.2170	opposite strand	Nucleoside-diphosphate-sugar epimerases
Pseudomonas benzenivorans	Pseudomonadaceae.135621	Pseudomonadales.72274	556533	1	fig|556533.3.peg.522	fig|556533.3.peg.523	opposite strand	Nucleoside-diphosphate-sugar epimerases
Pseudomonas peli	Pseudomonadaceae.135621	Pseudomonadales.72274	592361	1	fig|592361.3.peg.1635	fig|592361.3.peg.1634	opposite strand	NADH ubiquinone oxidoreductase chain A (EC 1.6.5.3)
Pseudomonas bauzanensis	Pseudomonadaceae.135621	Pseudomonadales.72274	653930	1	fig|653930.5.peg.1388	fig|653930.5.peg.1387	opposite strand	Nucleoside-diphosphate-sugar epimerases
Pseudomonas composti	Pseudomonadaceae.135621	Pseudomonadales.72274	658457	1	fig|658457.4.peg.4945	fig|658457.4.peg.4944	opposite strand	Nucleoside-diphosphate-sugar epimerases
Azotobacter salinestris	Pseudomonadaceae.135621	Pseudomonadales.72274	69964.3	1	fig|69964.3.peg.2938	fig|69964.3.peg.2939	opposite strand	Nucleoside-diphosphate-sugar epimerases
Pseudomonas litoralis	Pseudomonadaceae.135621	Pseudomonadales.72274	797277	1	fig|797277.3.peg.3289	fig|797277.3.peg.3288	opposite strand	Nucleoside-diphosphate-sugar epimerases
Pseudomonas gallaeciensis	Pseudomonadaceae.135621	Pseudomonadales.72274	857227	1	fig|857227.3.peg.3546	fig|857227.3.peg.3547	opposite strand	Nucleoside-diphosphate-sugar epimerases
Pseudomonas aestusnigri	Pseudomonadaceae.135621	Pseudomonadales.72274	857252	1	fig|857252.4.peg.442	fig|857252.4.peg.443	opposite strand	Nucleoside-diphosphate-sugar epimerases
Pseudomonas halophila	Pseudomonadaceae.135621	Pseudomonadales.72274	86177.4	1	fig|86177.4.peg.1899	fig|86177.4.peg.1898	opposite strand	Nucleoside-diphosphate-sugar epimerases
Pseudomonas nitritireducens	Pseudomonadaceae.135621	Pseudomonadales.72274	915472	1	fig|915472.3.peg.5922	fig|915472.3.peg.5921	opposite strand	Nucleoside-diphosphate-sugar epimerases
Pseudomonas multiresinivorans	Pseudomonadaceae.135621	Pseudomonadales.72274	95301.3	1	fig|95301.3.peg.786	fig|95301.3.peg.787	opposite strand	Nucleoside-diphosphate-sugar epimerases
Pseudomonas kuykendallii	Pseudomonadaceae.135621	Pseudomonadales.72274	1.0071e+06	1	fig|1007099.4.peg.3885	fig|1007099.4.peg.3884	same strand	putative TonB-dependent receptor
Pseudomonas chlororaphis	Pseudomonadaceae.135621	Pseudomonadales.72274	1.03792e+06	1	fig|1037915.3.peg.3920	fig|1037915.3.peg.3919	same strand	putative TonB-dependent receptor
Pseudomonas frederiksbergensis	Pseudomonadaceae.135621	Pseudomonadales.72274	104087	1	fig|104087.3.peg.4656	fig|104087.3.peg.4657	same strand	putative TonB-dependent receptor
Pseudomonas brassicacearum	Pseudomonadaceae.135621	Pseudomonadales.72274	1.05035e+06	1	fig|1050347.3.peg.604	fig|1050347.3.peg.605	same strand	putative TonB-dependent receptor
Pseudomonas extremaustralis	Pseudomonadaceae.135621	Pseudomonadales.72274	1.11796e+06	1	fig|1117958.3.peg.4737	fig|1117958.3.peg.4738	same strand	putative TonB-dependent receptor
Pseudomonas resinovorans	Pseudomonadaceae.135621	Pseudomonadales.72274	1.12302e+06	1	fig|1123020.3.peg.688	fig|1123020.3.peg.687	same strand	putative TonB-dependent receptor
Pseudomonas fragi	Pseudomonadaceae.135621	Pseudomonadales.72274	1.13448e+06	1	fig|1134475.3.peg.3135	fig|1134475.3.peg.3134	same strand	putative TonB-dependent receptor
Pseudomonas sagittaria	Pseudomonadaceae.135621	Pseudomonadales.72274	1.13599e+06	1	fig|1135990.3.peg.719	fig|1135990.3.peg.718	same strand	putative TonB-dependent receptor
Pseudomonas prosekii	Pseudomonadaceae.135621	Pseudomonadales.72274	1.14851e+06	1	fig|1148509.11.peg.4221	fig|1148509.11.peg.4220	same strand	putative TonB-dependent receptor
Pseudomonas pseudoalcaligenes	Pseudomonadaceae.135621	Pseudomonadales.72274	1.14913e+06	1	fig|1149133.19.peg.5710	fig|1149133.19.peg.5709	same strand	putative TonB-dependent receptor
Pseudomonas mandelii	Pseudomonadaceae.135621	Pseudomonadales.72274	1.15113e+06	1	fig|1151127.3.peg.3283	fig|1151127.3.peg.3285	same strand	putative TonB-dependent receptor
Pseudomonas umsongensis	Pseudomonadaceae.135621	Pseudomonadales.72274	1.15113e+06	1	fig|1151128.3.peg.3236	fig|1151128.3.peg.3237	same strand	putative TonB-dependent receptor
Pseudomonas avellanae	Pseudomonadaceae.135621	Pseudomonadales.72274	1.15476e+06	1	fig|1154758.3.peg.17	fig|1154758.3.peg.18	same strand	putative TonB-dependent receptor
Pseudomonas donghuensis	Pseudomonadaceae.135621	Pseudomonadales.72274	1.1634e+06	1	fig|1163398.4.peg.320	fig|1163398.4.peg.319	same strand	putative TonB-dependent receptor
Pseudomonas geniculata	Pseudomonadaceae.135621	Pseudomonadales.72274	1.16764e+06	1	fig|1167641.3.peg.783	fig|1167641.3.peg.782	same strand	Alkyl hydroperoxide reductase protein F
Azomonas agilis	Pseudomonadaceae.135621	Pseudomonadales.72274	116849	1	fig|116849.3.peg.1133	fig|116849.3.peg.1132	same strand	putative TonB-dependent receptor
Pseudomonas fuscovaginae	Pseudomonadaceae.135621	Pseudomonadales.72274	1.17649e+06	1	fig|1176490.3.peg.5316	fig|1176490.3.peg.5315	same strand	putative TonB-dependent receptor
Pseudomonas asturiensis	Pseudomonadaceae.135621	Pseudomonadales.72274	1.19042e+06	1	fig|1190415.4.peg.1775	fig|1190415.4.peg.1776	same strand	putative TonB-dependent receptor
Pseudomonas marginalis	Pseudomonadaceae.135621	Pseudomonadales.72274	1.19832e+06	1	fig|1198318.3.peg.149	fig|1198318.3.peg.148	same strand	putative TonB-dependent receptor
Pseudomonas psychrophila	Pseudomonadaceae.135621	Pseudomonadales.72274	1.21111e+06	1	fig|1211112.3.peg.2677	fig|1211112.3.peg.2676	same strand	putative TonB-dependent receptor
Pseudomonas azotoformans	Pseudomonadaceae.135621	Pseudomonadales.72274	1.21509e+06	1	fig|1215094.4.peg.3397	fig|1215094.4.peg.3396	same strand	hypothetical protein
Pseudomonas cremoricolorata	Pseudomonadaceae.135621	Pseudomonadales.72274	1.2151e+06	1	fig|1215098.3.peg.387	fig|1215098.3.peg.386	same strand	putative TonB-dependent receptor
Pseudomonas flavescens	Pseudomonadaceae.135621	Pseudomonadales.72274	1.2151e+06	1	fig|1215099.3.peg.435	fig|1215099.3.peg.434	same strand	putative TonB-dependent receptor
Pseudomonas japonica	Pseudomonadaceae.135621	Pseudomonadales.72274	1.2151e+06	1	fig|1215104.3.peg.923	fig|1215104.3.peg.922	same strand	putative TonB-dependent receptor
Pseudomonas monteilii	Pseudomonadaceae.135621	Pseudomonadales.72274	1.21511e+06	1	fig|1215110.3.peg.3053	fig|1215110.3.peg.3054	same strand	putative TonB-dependent receptor
Pseudomonas mucidolens	Pseudomonadaceae.135621	Pseudomonadales.72274	1.21511e+06	1	fig|1215111.3.peg.5008	fig|1215111.3.peg.5007	same strand	putative TonB-dependent receptor
Pseudomonas parafulva	Pseudomonadaceae.135621	Pseudomonadales.72274	1.21511e+06	1	fig|1215114.3.peg.524	fig|1215114.3.peg.525	same strand	putative TonB-dependent receptor
Pseudomonas punonensis	Pseudomonadaceae.135621	Pseudomonadales.72274	1.2205e+06	1	fig|1220495.4.peg.1431	fig|1220495.4.peg.1430	same strand	putative TonB-dependent receptor
Pseudomonas hunanensis	Pseudomonadaceae.135621	Pseudomonadales.72274	1.24755e+06	1	fig|1247546.3.peg.3369	fig|1247546.3.peg.3370	same strand	putative TonB-dependent receptor
Pseudomonas poae	Pseudomonadaceae.135621	Pseudomonadales.72274	1.28236e+06	1	fig|1282356.3.peg.4038	fig|1282356.3.peg.4037	same strand	putative TonB-dependent receptor
Pseudomonas guariconensis	Pseudomonadaceae.135621	Pseudomonadales.72274	1.28841e+06	1	fig|1288410.3.peg.3961	fig|1288410.3.peg.3962	same strand	putative TonB-dependent receptor
Pseudomonas cannabina	Pseudomonadaceae.135621	Pseudomonadales.72274	1.291e+06	1	fig|1290997.4.peg.7299	fig|1290997.4.peg.7300	same strand	putative TonB-dependent receptor
Pseudomonas taiwanensis	Pseudomonadaceae.135621	Pseudomonadales.72274	1.29203e+06	1	fig|1292030.3.peg.1641	fig|1292030.3.peg.1642	same strand	putative TonB-dependent receptor
Pseudomonas vranovensis	Pseudomonadaceae.135621	Pseudomonadales.72274	1.29203e+06	1	fig|1292031.3.peg.1137	fig|1292031.3.peg.1136	same strand	putative TonB-dependent receptor
Pseudomonas brenneri	Pseudomonadaceae.135621	Pseudomonadales.72274	129817	1	fig|129817.14.peg.3470	fig|129817.14.peg.3471	same strand	putative TonB-dependent receptor
Pseudomonas grimontii	Pseudomonadaceae.135621	Pseudomonadales.72274	129847	1	fig|129847.3.peg.1805	fig|129847.3.peg.1806	same strand	putative TonB-dependent receptor
Pseudomonas soli	Pseudomonadaceae.135621	Pseudomonadales.72274	1.30699e+06	1	fig|1306993.5.peg.1381	fig|1306993.5.peg.1382	same strand	putative TonB-dependent receptor
Pseudomonas corrugata	Pseudomonadaceae.135621	Pseudomonadales.72274	1.31693e+06	1	fig|1316927.4.peg.4249	fig|1316927.4.peg.4248	same strand	putative TonB-dependent receptor
Pseudomonas kilonensis	Pseudomonadaceae.135621	Pseudomonadales.72274	132477	1	fig|132476.7.peg.1804	fig|132476.7.peg.1802	same strand	putative TonB-dependent receptor
Pseudomonas plecoglossicida	Pseudomonadaceae.135621	Pseudomonadales.72274	1.33053e+06	1	fig|1330531.3.peg.3118	fig|1330531.3.peg.3119	same strand	putative TonB-dependent receptor
Pseudomonas mediterranea	Pseudomonadaceae.135621	Pseudomonadales.72274	1.34806e+06	1	fig|1348058.4.peg.3787	fig|1348058.4.peg.3786	same strand	putative TonB-dependent receptor
Pseudomonas viridiflava	Pseudomonadaceae.135621	Pseudomonadales.72274	1.35729e+06	1	fig|1357290.4.peg.4083	fig|1357290.4.peg.4084	same strand	putative TonB-dependent receptor
Pseudomonas oryzae	Pseudomonadaceae.135621	Pseudomonadales.72274	1.39288e+06	1	fig|1392877.3.peg.3404	fig|1392877.3.peg.3403	same strand	putative TonB-dependent receptor
Pseudomonas moraviensis	Pseudomonadaceae.135621	Pseudomonadales.72274	1.39552e+06	1	fig|1395516.4.peg.5454	fig|1395516.4.peg.5453	same strand	putative TonB-dependent receptor
Pseudomonas mosselii	Pseudomonadaceae.135621	Pseudomonadales.72274	1.40334e+06	1	fig|1403339.3.peg.2587	fig|1403339.3.peg.2586	same strand	putative TonB-dependent receptor
Pseudomonas protegens	Pseudomonadaceae.135621	Pseudomonadales.72274	1.4206e+06	1	fig|1420599.3.peg.6031	fig|1420599.3.peg.6030	same strand	putative TonB-dependent receptor
Pseudomonas granadensis	Pseudomonadaceae.135621	Pseudomonadales.72274	1.42143e+06	1	fig|1421430.4.peg.4913	fig|1421430.4.peg.4912	same strand	putative TonB-dependent receptor
Pseudomonas salegens	Pseudomonadaceae.135621	Pseudomonadales.72274	1.43407e+06	1	fig|1434072.3.peg.3249	fig|1434072.3.peg.3250	same strand	Putative sulfate permease
Pseudomonas cichorii	Pseudomonadaceae.135621	Pseudomonadales.72274	1.44163e+06	1	fig|1441629.3.peg.103	fig|1441629.3.peg.104	same strand	putative TonB-dependent receptor
Pseudomonas caspiana	Pseudomonadaceae.135621	Pseudomonadales.72274	1.45145e+06	1	fig|1451454.3.peg.4224	fig|1451454.3.peg.4223	same strand	putative TonB-dependent receptor
Pseudomonas helmanticensis	Pseudomonadaceae.135621	Pseudomonadales.72274	1.47138e+06	1	fig|1471381.4.peg.5926	fig|1471381.4.peg.5925	same strand	putative TonB-dependent receptor
Pseudomonas endophytica	Pseudomonadaceae.135621	Pseudomonadales.72274	1.56316e+06	1	fig|1563157.3.peg.2635	fig|1563157.3.peg.2633	same strand	putative TonB-dependent receptor
Pseudomonas cerasi	Pseudomonadaceae.135621	Pseudomonadales.72274	1.58334e+06	1	fig|1583341.15.peg.5270	fig|1583341.15.peg.5269	same strand	putative TonB-dependent receptor
Pseudomonas graminis	Pseudomonadaceae.135621	Pseudomonadales.72274	158627	1	fig|158627.14.peg.111	fig|158627.14.peg.110	same strand	putative TonB-dependent receptor
Pseudomonas coleopterorum	Pseudomonadaceae.135621	Pseudomonadales.72274	1.60584e+06	1	fig|1605838.5.peg.4212	fig|1605838.5.peg.4211	same strand	putative TonB-dependent receptor
Pseudomonas helleri	Pseudomonadaceae.135621	Pseudomonadales.72274	1.609e+06	1	fig|1608996.6.peg.2088	fig|1608996.6.peg.2087	same strand	putative TonB-dependent receptor
Pseudomonas lactis	Pseudomonadaceae.135621	Pseudomonadales.72274	1.61567e+06	1	fig|1615674.16.peg.2800	fig|1615674.16.peg.2801	same strand	putative TonB-dependent receptor
Pseudomonas kribbensis	Pseudomonadaceae.135621	Pseudomonadales.72274	1.62809e+06	1	fig|1628086.3.peg.5675	fig|1628086.3.peg.5674	same strand	putative TonB-dependent receptor
Pseudomonas lini	Pseudomonadaceae.135621	Pseudomonadales.72274	163011	1	fig|163011.23.peg.1981	fig|163011.23.peg.1982	same strand	putative TonB-dependent receptor
Pseudomonas costantinii	Pseudomonadaceae.135621	Pseudomonadales.72274	168470	1	fig|168469.5.peg.3183	fig|168469.5.peg.3182	same strand	hypothetical protein
Pseudomonas extremorientalis	Pseudomonadaceae.135621	Pseudomonadales.72274	169670	1	fig|169669.6.peg.3263	fig|169669.6.peg.3262	same strand	hypothetical protein
Pseudomonas wadenswilerensis	Pseudomonadaceae.135621	Pseudomonadales.72274	1.78516e+06	1	fig|1785161.3.peg.800	fig|1785161.3.peg.801	same strand	putative TonB-dependent receptor
Pseudomonas reidholzensis	Pseudomonadaceae.135621	Pseudomonadales.72274	1.78516e+06	1	fig|1785162.3.peg.3161	fig|1785162.3.peg.3162	same strand	putative TonB-dependent receptor
Pseudomonas silesiensis	Pseudomonadaceae.135621	Pseudomonadales.72274	1.85313e+06	1	fig|1853130.6.peg.6211	fig|1853130.6.peg.6210	same strand	putative TonB-dependent receptor
Pseudomonas acidophila	Pseudomonadaceae.135621	Pseudomonadales.72274	1.9126e+06	1	fig|1912599.5.peg.2909	fig|1912599.5.peg.2910	same strand	ATP-dependent DNA helicase RecG (EC 3.6.4.12)
Pseudomonas palleroniana	Pseudomonadaceae.135621	Pseudomonadales.72274	191390	1	fig|191390.3.peg.2014	fig|191390.3.peg.2015	same strand	putative TonB-dependent receptor
Pseudomonas salomonii	Pseudomonadaceae.135621	Pseudomonadales.72274	191392	1	fig|191391.6.peg.3678	fig|191391.6.peg.3679	same strand	putative TonB-dependent receptor
Pseudomonas laurylsulfatovorans	Pseudomonadaceae.135621	Pseudomonadales.72274	1.94363e+06	1	fig|1943631.4.peg.5101	fig|1943631.4.peg.5100	same strand	putative TonB-dependent receptor
Pseudomonas koreensis	Pseudomonadaceae.135621	Pseudomonadales.72274	198621	1	fig|198620.75.peg.461	fig|198620.75.peg.460	same strand	putative TonB-dependent receptor
Pseudomonas trivialis	Pseudomonadaceae.135621	Pseudomonadales.72274	200451	1	fig|200450.8.peg.1187	fig|200450.8.peg.1186	same strand	putative TonB-dependent receptor
Pseudomonas congelans	Pseudomonadaceae.135621	Pseudomonadales.72274	200452	1	fig|200452.18.peg.648	fig|200452.18.peg.647	same strand	putative TonB-dependent receptor
Pseudomonas tremae	Pseudomonadaceae.135621	Pseudomonadales.72274	200454	1	fig|200454.3.peg.2241	fig|200454.3.peg.2240	same strand	putative TonB-dependent receptor
Pseudomonas bohemica	Pseudomonadaceae.135621	Pseudomonadales.72274	2.04487e+06	1	fig|2044872.3.peg.5299	fig|2044872.3.peg.5300	same strand	putative TonB-dependent receptor
Pseudomonas inefficax	Pseudomonadaceae.135621	Pseudomonadales.72274	2.07879e+06	1	fig|2078786.3.peg.68	fig|2078786.3.peg.67	same strand	putative TonB-dependent receptor
Pseudomonas rhizosphaerae	Pseudomonadaceae.135621	Pseudomonadales.72274	216142	1	fig|216142.3.peg.3250	fig|216142.3.peg.3251	same strand	putative TonB-dependent receptor
Pseudomonas antarctica	Pseudomonadaceae.135621	Pseudomonadales.72274	219572	1	fig|219572.4.peg.828	fig|219572.4.peg.829	same strand	putative TonB-dependent receptor
Pseudomonas proteolytica	Pseudomonadaceae.135621	Pseudomonadales.72274	219574	1	fig|219574.4.peg.2060	fig|219574.4.peg.2059	same strand	putative TonB-dependent receptor
Pseudomonas asiatica	Pseudomonadaceae.135621	Pseudomonadales.72274	2.21923e+06	1	fig|2219225.11.peg.4829	fig|2219225.11.peg.4830	same strand	putative TonB-dependent receptor
Pseudomonas syringae	Pseudomonadaceae.135621	Pseudomonadales.72274	223284	1	fig|223283.9.peg.68	fig|223283.9.peg.69	same strand	putative TonB-dependent receptor
Pseudomonas kairouanensis	Pseudomonadaceae.135621	Pseudomonadales.72274	2.29383e+06	1	fig|2293832.3.peg.2343	fig|2293832.3.peg.2344	same strand	putative TonB-dependent receptor
Pseudomonas nabeulensis	Pseudomonadaceae.135621	Pseudomonadales.72274	2.29383e+06	1	fig|2293833.3.peg.4720	fig|2293833.3.peg.4719	same strand	putative TonB-dependent receptor
Pseudomonas laurentiana	Pseudomonadaceae.135621	Pseudomonadales.72274	2.36465e+06	1	fig|2364649.3.peg.2949	fig|2364649.3.peg.2950	same strand	putative TonB-dependent receptor
Pseudomonas alkylphenolica	Pseudomonadaceae.135621	Pseudomonadales.72274	237609	1	fig|237609.16.peg.47	fig|237609.16.peg.46	same strand	putative TonB-dependent receptor
Pseudomonas alkylphenolia	Pseudomonadaceae.135621	Pseudomonadales.72274	237609	1	fig|237609.3.peg.5100	fig|237609.3.peg.5099	same strand	putative TonB-dependent receptor
Pseudomonas lutea	Pseudomonadaceae.135621	Pseudomonadales.72274	243924	1	fig|243924.3.peg.4054	fig|243924.3.peg.4053	same strand	putative TonB-dependent receptor
Pseudomonas amygdali	Pseudomonadaceae.135621	Pseudomonadales.72274	251722	1	fig|251722.21.peg.3750	fig|251722.21.peg.3749	same strand	putative TonB-dependent receptor
Pseudomonas haemolytica	Pseudomonadaceae.135621	Pseudomonadales.72274	2.60007e+06	1	fig|2600065.3.peg.1216	fig|2600065.3.peg.1217	same strand	putative TonB-dependent receptor
Pseudomonas mesoacidophila	Pseudomonadaceae.135621	Pseudomonadales.72274	265293	1	fig|265293.12.peg.757	fig|265293.12.peg.756	same strand	ATP-dependent DNA helicase RecG (EC 3.6.4.12)
Pseudomonas juntendi	Pseudomonadaceae.135621	Pseudomonadales.72274	2.66618e+06	1	fig|2666183.3.peg.3389	fig|2666183.3.peg.3390	same strand	putative TonB-dependent receptor
Pseudomonas argentinensis	Pseudomonadaceae.135621	Pseudomonadales.72274	289370	1	fig|289370.10.peg.1942	fig|289370.10.peg.1941	same strand	putative TonB-dependent receptor
Pseudomonas fluorescens	Pseudomonadaceae.135621	Pseudomonadales.72274	294.21	1	fig|294.210.peg.766	fig|294.210.peg.765	same strand	putative TonB-dependent receptor
Pseudomonas panacis	Pseudomonadaceae.135621	Pseudomonadales.72274	307252	1	fig|307251.6.peg.3661	fig|307251.6.peg.3660	same strand	putative TonB-dependent receptor
Pseudomonas simiae	Pseudomonadaceae.135621	Pseudomonadales.72274	321846	1	fig|321846.5.peg.3084	fig|321846.5.peg.3085	same strand	putative TonB-dependent receptor
Pseudomonas savastanoi	Pseudomonadaceae.135621	Pseudomonadales.72274	360923	1	fig|360922.6.peg.5943	fig|360922.6.peg.5944	same strand	putative TonB-dependent receptor
Pseudomonas entomophila	Pseudomonadaceae.135621	Pseudomonadales.72274	384677	1	fig|384676.9.peg.5238	fig|384676.9.peg.5237	same strand	putative TonB-dependent receptor
Pseudomonas reinekei	Pseudomonadaceae.135621	Pseudomonadales.72274	395598	1	fig|395598.4.peg.2729	fig|395598.4.peg.2730	same strand	putative TonB-dependent receptor
Pseudomonas moorei	Pseudomonadaceae.135621	Pseudomonadales.72274	395599	1	fig|395599.12.peg.4281	fig|395599.12.peg.4280	same strand	putative TonB-dependent receptor
Pseudomonas mohnii	Pseudomonadaceae.135621	Pseudomonadales.72274	395600	1	fig|395600.4.peg.3356	fig|395600.4.peg.3357	same strand	putative TonB-dependent receptor
Pseudomonas caricapapayae	Pseudomonadaceae.135621	Pseudomonadales.72274	46678.3	1	fig|46678.3.peg.2252	fig|46678.3.peg.2251	same strand	putative TonB-dependent receptor
Pseudomonas straminea	Pseudomonadaceae.135621	Pseudomonadales.72274	47882.3	1	fig|47882.3.peg.785	fig|47882.3.peg.784	same strand	putative TonB-dependent receptor
Pseudomonas taetrolens	Pseudomonadaceae.135621	Pseudomonadales.72274	47884.5	1	fig|47884.5.peg.674	fig|47884.5.peg.673	same strand	putative TonB-dependent receptor
Pseudomonas yamanorum	Pseudomonadaceae.135621	Pseudomonadales.72274	515393	1	fig|515393.3.peg.3370	fig|515393.3.peg.3371	same strand	hypothetical protein
Pseudomonas massiliensis	Pseudomonadaceae.135621	Pseudomonadales.72274	522492	1	fig|522492.4.peg.1070	fig|522492.4.peg.1069	same strand	hypothetical protein
Pseudomonas asplenii	Pseudomonadaceae.135621	Pseudomonadales.72274	53407.1	1	fig|53407.12.peg.3928	fig|53407.12.peg.3927	same strand	putative TonB-dependent receptor
Pseudomonas coronafaciens	Pseudomonadaceae.135621	Pseudomonadales.72274	53409.4	1	fig|53409.4.peg.1401	fig|53409.4.peg.1402	same strand	putative TonB-dependent receptor
Pseudomonas ficuserectae	Pseudomonadaceae.135621	Pseudomonadales.72274	53410.8	1	fig|53410.8.peg.1722	fig|53410.8.peg.1723	same strand	putative TonB-dependent receptor
Pseudomonas saponiphila	Pseudomonadaceae.135621	Pseudomonadales.72274	556534	1	fig|556534.4.peg.701	fig|556534.4.peg.700	same strand	putative TonB-dependent receptor
Pseudomonas tolaasii	Pseudomonadaceae.135621	Pseudomonadales.72274	564424	1	fig|564423.8.peg.1209	fig|564423.8.peg.1208	same strand	putative TonB-dependent receptor
Pseudomonas seleniipraecipitans	Pseudomonadaceae.135621	Pseudomonadales.72274	640205	1	fig|640205.3.peg.1800	fig|640205.3.peg.1799	same strand	putative TonB-dependent receptor
Pseudomonas cedrina	Pseudomonadaceae.135621	Pseudomonadales.72274	651740	1	fig|651740.3.peg.5112	fig|651740.3.peg.5111	same strand	putative TonB-dependent receptor
Pseudomonas arsenicoxydans	Pseudomonadaceae.135621	Pseudomonadales.72274	702116	1	fig|702115.7.peg.1154	fig|702115.7.peg.1157	same strand	putative TonB-dependent receptor
Serpens flexibilis	Pseudomonadaceae.135621	Pseudomonadales.72274	706570	1	fig|706570.3.peg.2087	fig|706570.3.peg.2088	same strand	putative TonB-dependent receptor
Pseudomonas flexibilis	Pseudomonadaceae.135621	Pseudomonadales.72274	706570	1	fig|706570.5.peg.3423	fig|706570.5.peg.3424	same strand	putative TonB-dependent receptor
Pseudomonas gingeri	Pseudomonadaceae.135621	Pseudomonadales.72274	707248	1	fig|707248.5.peg.2419	fig|707248.5.peg.2418	same strand	putative TonB-dependent receptor
Pseudomonas fulva	Pseudomonadaceae.135621	Pseudomonadales.72274	743720	1	fig|743720.3.peg.283	fig|743720.3.peg.284	same strand	putative TonB-dependent receptor
Pseudomonas libanensis	Pseudomonadaceae.135621	Pseudomonadales.72274	75588.4	1	fig|75588.4.peg.3563	fig|75588.4.peg.3562	same strand	putative TonB-dependent receptor
Pseudomonas orientalis	Pseudomonadaceae.135621	Pseudomonadales.72274	76758.2	1	fig|76758.19.peg.5169	fig|76758.19.peg.5170	same strand	putative TonB-dependent receptor
Pseudomonas rhodesiae	Pseudomonadaceae.135621	Pseudomonadales.72274	76760.3	1	fig|76760.3.peg.1453	fig|76760.3.peg.1454	same strand	putative TonB-dependent receptor
Pseudomonas veronii	Pseudomonadaceae.135621	Pseudomonadales.72274	76761.3	1	fig|76761.29.peg.4615	fig|76761.29.peg.4614	same strand	putative TonB-dependent receptor
Pseudomonas jessenii	Pseudomonadaceae.135621	Pseudomonadales.72274	77298.3	1	fig|77298.3.peg.468	fig|77298.3.peg.467	same strand	putative TonB-dependent receptor
Pseudomonas migulae	Pseudomonadaceae.135621	Pseudomonadales.72274	78543.4	1	fig|78543.4.peg.5456	fig|78543.4.peg.5454	same strand	putative TonB-dependent receptor
Pseudomonas gessardii	Pseudomonadaceae.135621	Pseudomonadales.72274	78544.3	1	fig|78544.3.peg.3476	fig|78544.3.peg.3477	same strand	putative TonB-dependent receptor
Pseudomonas meliae	Pseudomonadaceae.135621	Pseudomonadales.72274	86176.4	1	fig|86176.4.peg.5054	fig|86176.4.peg.5053	same strand	putative TonB-dependent receptor
Pseudomonas lundensis	Pseudomonadaceae.135621	Pseudomonadales.72274	86185.4	1	fig|86185.35.peg.3140	fig|86185.35.peg.3141	same strand	putative TonB-dependent receptor
Pseudomonas cissicola	Pseudomonadaceae.135621	Pseudomonadales.72274	86186.3	1	fig|86186.3.peg.2188	fig|86186.3.peg.2189	same strand	Alkyl hydroperoxide reductase protein F
Pseudomonas thivervalensis	Pseudomonadaceae.135621	Pseudomonadales.72274	86265.6	1	fig|86265.6.peg.5769	fig|86265.6.peg.5767	same strand	putative TonB-dependent receptor
Pseudomonas deceptionensis	Pseudomonadaceae.135621	Pseudomonadales.72274	882212	1	fig|882211.6.peg.959	fig|882211.6.peg.958	same strand	putative TonB-dependent receptor
Pseudomonas abietaniphila	Pseudomonadaceae.135621	Pseudomonadales.72274	89065.1	1	fig|89065.12.peg.6773	fig|89065.12.peg.6772	same strand	putative TonB-dependent receptor
Pseudomonas linyingensis	Pseudomonadaceae.135621	Pseudomonadales.72274	915471	1	fig|915471.3.peg.3646	fig|915471.3.peg.3645	same strand	putative TonB-dependent receptor
Pseudomonas thermotolerans	Pseudomonadaceae.135621	Pseudomonadales.72274	935867	1	fig|935867.3.peg.2669	fig|935867.3.peg.2668	same strand	putative TonB-dependent receptor
Pseudomonas vancouverensis	Pseudomonadaceae.135621	Pseudomonadales.72274	95300.1	1	fig|95300.10.peg.5209	fig|95300.10.peg.5210	same strand	putative TonB-dependent receptor
Pseudomonas synxantha	Pseudomonadaceae.135621	Pseudomonadales.72274	96901.3	1	fig|96901.3.peg.5383	fig|96901.3.peg.5382	same strand	putative TonB-dependent receptor
Ventosimonas gracilis	Ventosimonadaceae.1827282	Pseudomonadales.72274	1.68076e+06	1	fig|1680762.6.peg.2618	fig|1680762.6.peg.2617	same strand	Uncharacterized membrane protein PA1577
Salinisphaera shabanensis	Salinisphaeraceae.742031	Salinisphaerales.742030	1.0338e+06	1	fig|1033802.3.peg.3629	fig|1033802.3.peg.3628	same strand	Coproporphyrinogen III oxidase, aerobic (EC 1.3.3.3)
Salinisphaera halophila	Salinisphaeraceae.742031	Salinisphaerales.742030	1.05114e+06	1	fig|1051139.6.peg.2320	fig|1051139.6.peg.2319	same strand	Coproporphyrinogen III oxidase, aerobic (EC 1.3.3.3)
Salinisphaera japonica	Salinisphaeraceae.742031	Salinisphaerales.742030	1.20978e+06	1	fig|1209778.3.peg.399	fig|1209778.3.peg.398	same strand	Coproporphyrinogen III oxidase, aerobic (EC 1.3.3.3)
Salinisphaera hydrothermalis	Salinisphaeraceae.742031	Salinisphaerales.742030	1.30428e+06	1	fig|1304275.5.peg.260	fig|1304275.5.peg.259	same strand	Coproporphyrinogen III oxidase, aerobic (EC 1.3.3.3)
Salinisphaera orenii	Salinisphaeraceae.742031	Salinisphaerales.742030	856730	1	fig|856730.3.peg.2901	fig|856730.3.peg.2902	same strand	Coproporphyrinogen III oxidase, aerobic (EC 1.3.3.3)
Allofrancisella frigidaquae	Francisellaceae.34064	Thiotrichales.72273	1.08564e+06	1	fig|1085644.3.peg.574	fig|1085644.3.peg.575	opposite strand	hypothetical protein
Allofrancisella inopinata	Francisellaceae.34064	Thiotrichales.72273	1.08565e+06	1	fig|1085647.3.peg.26	fig|1085647.3.peg.25	opposite strand	hypothetical protein
Francisella persica	Francisellaceae.34064	Thiotrichales.72273	1.08673e+06	1	fig|1086726.6.peg.641	fig|1086726.6.peg.639	opposite strand	hypothetical protein
Francisella hispaniensis	Francisellaceae.34064	Thiotrichales.72273	1.08888e+06	1	fig|1088883.5.peg.1032	fig|1088883.5.peg.1033	opposite strand	hypothetical protein
Francisella noatunensis	Francisellaceae.34064	Thiotrichales.72273	1.08943e+06	1	fig|1089433.5.peg.1081	fig|1089433.5.peg.1080	opposite strand	hypothetical protein
Francisella tularensis	Francisellaceae.34064	Thiotrichales.72273	1.36785e+06	1	fig|1367846.3.peg.795	fig|1367846.3.peg.794	opposite strand	hypothetical protein
Francisella endosymbiont FLE_OM	Francisellaceae.34064	Thiotrichales.72273	1.98117e+06	1	fig|1981171.3.peg.469	fig|1981171.3.peg.470	opposite strand	hypothetical protein
Francisella marina	Francisellaceae.34064	Thiotrichales.72273	2.2493e+06	1	fig|2249302.3.peg.779	fig|2249302.3.peg.778	opposite strand	hypothetical protein
Francisella endosymbiont FLE_AM	Francisellaceae.34064	Thiotrichales.72273	255919	1	fig|255919.4.peg.476	fig|255919.4.peg.477	opposite strand	hypothetical protein
Francisella philomiragia	Francisellaceae.34064	Thiotrichales.72273	28110.1	1	fig|28110.12.peg.1133	fig|28110.12.peg.1132	opposite strand	hypothetical protein
Francisella halioticida	Francisellaceae.34064	Thiotrichales.72273	549298	1	fig|549298.4.peg.1049	fig|549298.4.peg.1050	opposite strand	hypothetical protein
Francisella guangzhouensis	Francisellaceae.34064	Thiotrichales.72273	594679	1	fig|594679.4.peg.1163	fig|594679.4.peg.1162	opposite strand	hypothetical protein
Methylophaga aminisulfidivorans	Piscirickettsiaceae.135616	Thiotrichales.72273	1.02688e+06	1	fig|1026882.3.peg.358	fig|1026882.3.peg.359	opposite strand	Rubredoxin
Hydrogenovibrio marinus	Piscirickettsiaceae.135616	Thiotrichales.72273	1.12351e+06	1	fig|1123513.6.peg.1756	fig|1123513.6.peg.1757	opposite strand	Nitroreductase family protein
Thiomicrospira arctica	Piscirickettsiaceae.135616	Thiotrichales.72273	1.12351e+06	1	fig|1123514.3.peg.2186	fig|1123514.3.peg.2187	opposite strand	hypothetical protein
Thiomicrospira chilensis	Piscirickettsiaceae.135616	Thiotrichales.72273	1.12352e+06	1	fig|1123515.3.peg.81	fig|1123515.3.peg.82	opposite strand	hypothetical protein
Thiomicrospira pelophila	Piscirickettsiaceae.135616	Thiotrichales.72273	1.12352e+06	1	fig|1123517.3.peg.166	fig|1123517.3.peg.167	opposite strand	Nitroreductase
Thiomicrospira kuenenii	Piscirickettsiaceae.135616	Thiotrichales.72273	1.16807e+06	1	fig|1168067.3.peg.2215	fig|1168067.3.peg.2214	opposite strand	Putative nitroreductase family protein SACOL0874
Piscirickettsia salmonis	Piscirickettsiaceae.135616	Thiotrichales.72273	1238.86	1	fig|1238.86.peg.2983	fig|1238.86.peg.2984	opposite strand	Uncharacterized membrane protein PA1577
Methylophaga lonarensis	Piscirickettsiaceae.135616	Thiotrichales.72273	1.28611e+06	1	fig|1286106.3.peg.631	fig|1286106.3.peg.630	opposite strand	Rubredoxin
Hydrogenovibrio thermophilus	Piscirickettsiaceae.135616	Thiotrichales.72273	265883	1	fig|265883.3.peg.94	fig|265883.3.peg.93	opposite strand	Nitroreductase family protein
Methylophaga muralis	Piscirickettsiaceae.135616	Thiotrichales.72273	291169	1	fig|291169.3.peg.304	fig|291169.3.peg.305	opposite strand	Rubredoxin
Thiomicrospira crunogena	Piscirickettsiaceae.135616	Thiotrichales.72273	317026	1	fig|317025.9.peg.58	fig|317025.9.peg.57	opposite strand	Nitroreductase family protein
Sulfurivirga caldicuralii	Piscirickettsiaceae.135616	Thiotrichales.72273	364032	1	fig|364032.3.peg.112	fig|364032.3.peg.111	opposite strand	Nitroreductase
Hydrogenovibrio crunogenus	Piscirickettsiaceae.135616	Thiotrichales.72273	39765.4	1	fig|39765.4.peg.49	fig|39765.4.peg.48	opposite strand	Nitroreductase family protein
Thiomicrospira microaerophila	Piscirickettsiaceae.135616	Thiotrichales.72273	406020	1	fig|406020.4.peg.1135	fig|406020.4.peg.1134	opposite strand	Nitroreductase family protein
Thiomicrospira aerophila	Piscirickettsiaceae.135616	Thiotrichales.72273	717772	1	fig|717772.5.peg.2079	fig|717772.5.peg.2078	opposite strand	Nitroreductase
Methylophaga nitratireducenticrescens	Piscirickettsiaceae.135616	Thiotrichales.72273	754476	1	fig|754476.31.peg.286	fig|754476.31.peg.287	opposite strand	Rubredoxin
Thiomicrospira halophila	Piscirickettsiaceae.135616	Thiotrichales.72273	1.12352e+06	1	fig|1123516.3.peg.952	fig|1123516.3.peg.953	same strand	diguanylate cyclase/phosphodiesterase (GGDEF & EAL domains) with PAS/PAC sensor(s)
Cycloclasticus zancles	Piscirickettsiaceae.135616	Thiotrichales.72273	1.19823e+06	1	fig|1198232.3.peg.353	fig|1198232.3.peg.354	same strand	Phosphoethanolamine transferase EptC [E.coli], specific for LPS heptose I residue
Cycloclasticus pugetii	Piscirickettsiaceae.135616	Thiotrichales.72273	655438	1	fig|655438.3.peg.2134	fig|655438.3.peg.2133	same strand	Diacylglycerol kinase (EC 2.7.1.107)
Thiothrix lacustris	Thiotrichaceae.135617	Thiotrichales.72273	1.1234e+06	1	fig|1123401.3.peg.2335	fig|1123401.3.peg.2336	opposite strand	Polysaccharide biosynthesis protein
Thiothrix caldifontis	Thiotrichaceae.135617	Thiotrichales.72273	525918	1	fig|525918.3.peg.540	fig|525918.3.peg.541	opposite strand	Polysaccharide biosynthesis protein
Cocleimonas flava	Thiotrichaceae.135617	Thiotrichales.72273	634765	1	fig|634765.3.peg.686	fig|634765.3.peg.685	opposite strand	Hybrid peroxiredoxin hyPrx5 (EC 1.11.1.15)
Thiothrix nivea	Thiotrichaceae.135617	Thiotrichales.72273	870187	1	fig|870187.4.peg.3533	fig|870187.4.peg.3534	opposite strand	Capsular polysaccharide biosynthesis protein
Leucothrix mucor	Thiotrichaceae.135617	Thiotrichales.72273	998674	1	fig|998674.3.peg.3734	fig|998674.3.peg.3733	opposite strand	Alkyl hydroperoxide reductase protein C (EC 1.11.1.15)
Thiothrix disciformis	Thiotrichaceae.135617	Thiotrichales.72273	1.1234e+06	1	fig|1123399.3.peg.1549	fig|1123399.3.peg.1550	same strand	hypothetical protein
Thiothrix flexilis	Thiotrichaceae.135617	Thiotrichales.72273	1.1234e+06	1	fig|1123400.3.peg.1017	fig|1123400.3.peg.1016	same strand	3-hydroxybutyryl-CoA dehydrogenase (EC 1.1.1.157); 3-hydroxyacyl-CoA dehydrogenase (EC 1.1.1.35)
Thiothrix eikelboomii	Thiotrichaceae.135617	Thiotrichales.72273	92487.3	1	fig|92487.3.peg.576	fig|92487.3.peg.575	same strand	hypothetical protein
Vibrio tubiashii	Vibrionaceae.641	Vibrionales.135623	1.05165e+06	1	fig|1051646.9.peg.2776	fig|1051646.9.peg.2777	opposite strand	Hybrid peroxiredoxin hyPrx5 (EC 1.11.1.15)
Vibrio alfacsensis	Vibrionaceae.641	Vibrionales.135623	1.07431e+06	1	fig|1074311.9.peg.299	fig|1074311.9.peg.298	opposite strand	Hybrid peroxiredoxin hyPrx5 (EC 1.11.1.15)
Vibrio aestivus	Vibrionaceae.641	Vibrionales.135623	1.11771e+06	1	fig|1117706.4.peg.5321	fig|1117706.4.peg.5320	opposite strand	Hybrid peroxiredoxin hyPrx5 (EC 1.11.1.15)
Vibrio quintilis	Vibrionaceae.641	Vibrionales.135623	1.11771e+06	1	fig|1117707.4.peg.2692	fig|1117707.4.peg.2691	opposite strand	Hybrid peroxiredoxin hyPrx5 (EC 1.11.1.15)
Enterovibrio calviensis	Vibrionaceae.641	Vibrionales.135623	1.12187e+06	1	fig|1121867.3.peg.3963	fig|1121867.3.peg.3962	opposite strand	Hybrid peroxiredoxin hyPrx5 (EC 1.11.1.15)
Enterovibrio nigricans	Vibrionaceae.641	Vibrionales.135623	1.12187e+06	1	fig|1121868.4.peg.2748	fig|1121868.4.peg.2749	opposite strand	Hybrid peroxiredoxin hyPrx5 (EC 1.11.1.15)
Enterovibrio norvegicus	Vibrionaceae.641	Vibrionales.135623	1.12187e+06	1	fig|1121869.4.peg.2676	fig|1121869.4.peg.2677	opposite strand	Hybrid peroxiredoxin hyPrx5 (EC 1.11.1.15)
Vibrio pacinii	Vibrionaceae.641	Vibrionales.135623	1.12349e+06	1	fig|1123494.3.peg.3590	fig|1123494.3.peg.3591	opposite strand	Hybrid peroxiredoxin hyPrx5 (EC 1.11.1.15)
Vibrio rhizosphaerae	Vibrionaceae.641	Vibrionales.135623	1.1235e+06	1	fig|1123497.3.peg.2546	fig|1123497.3.peg.2547	opposite strand	Hybrid peroxiredoxin hyPrx5 (EC 1.11.1.15)
Vibrio ruber	Vibrionaceae.641	Vibrionales.135623	1.1235e+06	1	fig|1123498.5.peg.1845	fig|1123498.5.peg.1844	opposite strand	Hybrid peroxiredoxin hyPrx5 (EC 1.11.1.15)
Vibrio kanaloae	Vibrionaceae.641	Vibrionales.135623	1.1913e+06	1	fig|1191299.3.peg.1114	fig|1191299.3.peg.1116	opposite strand	Hybrid peroxiredoxin hyPrx5 (EC 1.11.1.15)
Vibrio tasmaniensis	Vibrionaceae.641	Vibrionales.135623	1.19132e+06	1	fig|1191323.3.peg.1089	fig|1191323.3.peg.1088	opposite strand	Hybrid peroxiredoxin hyPrx5 (EC 1.11.1.15)
Vibrio toranzoniae	Vibrionaceae.641	Vibrionales.135623	1.19443e+06	1	fig|1194427.28.peg.3974	fig|1194427.28.peg.3973	opposite strand	Hybrid peroxiredoxin hyPrx5 (EC 1.11.1.15)
Photobacterium aquae	Vibrionaceae.641	Vibrionales.135623	1.19576e+06	1	fig|1195763.3.peg.1133	fig|1195763.3.peg.1132	opposite strand	Hybrid peroxiredoxin hyPrx5 (EC 1.11.1.15)
Vibrio breoganii	Vibrionaceae.641	Vibrionales.135623	1.20591e+06	1	fig|1205908.3.peg.491	fig|1205908.3.peg.492	opposite strand	Hybrid peroxiredoxin hyPrx5 (EC 1.11.1.15)
Vibrio neocaledonicus	Vibrionaceae.641	Vibrionales.135623	1.20831e+06	1	fig|1208308.6.peg.2969	fig|1208308.6.peg.2970	opposite strand	Hybrid peroxiredoxin hyPrx5 (EC 1.11.1.15)
Vibrio aerogenes	Vibrionaceae.641	Vibrionales.135623	1.21601e+06	1	fig|1216006.5.peg.474	fig|1216006.5.peg.475	opposite strand	Hybrid peroxiredoxin hyPrx5 (EC 1.11.1.15)
Vibrio marisflavi	Vibrionaceae.641	Vibrionales.135623	1.21604e+06	1	fig|1216040.4.peg.3336	fig|1216040.4.peg.3335	opposite strand	Hybrid peroxiredoxin hyPrx5 (EC 1.11.1.15)
Vibrio sagamiensis	Vibrionaceae.641	Vibrionales.135623	1.21906e+06	1	fig|1219064.10.peg.2968	fig|1219064.10.peg.2967	opposite strand	Hybrid peroxiredoxin hyPrx5 (EC 1.11.1.15)
Vibrio natriegens	Vibrionaceae.641	Vibrionales.135623	1.21907e+06	1	fig|1219067.12.peg.2625	fig|1219067.12.peg.2626	opposite strand	Hybrid peroxiredoxin hyPrx5 (EC 1.11.1.15)
Vibrio nereis	Vibrionaceae.641	Vibrionales.135623	1.21907e+06	1	fig|1219068.3.peg.3554	fig|1219068.3.peg.3553	opposite strand	Hybrid peroxiredoxin hyPrx5 (EC 1.11.1.15)
Vibrio mediterranei	Vibrionaceae.641	Vibrionales.135623	1.21907e+06	1	fig|1219069.3.peg.4671	fig|1219069.3.peg.4672	opposite strand	Hybrid peroxiredoxin hyPrx5 (EC 1.11.1.15)
Vibrio inusitatus	Vibrionaceae.641	Vibrionales.135623	1.21907e+06	1	fig|1219070.3.peg.2230	fig|1219070.3.peg.2229	opposite strand	Hybrid peroxiredoxin hyPrx5 (EC 1.11.1.15)
Vibrio azureus	Vibrionaceae.641	Vibrionales.135623	1.21908e+06	1	fig|1219077.3.peg.1227	fig|1219077.3.peg.1228	opposite strand	Hybrid peroxiredoxin hyPrx5 (EC 1.11.1.15)
Vibrio comitans	Vibrionaceae.641	Vibrionales.135623	1.21908e+06	1	fig|1219078.3.peg.2732	fig|1219078.3.peg.2731	opposite strand	Hybrid peroxiredoxin hyPrx5 (EC 1.11.1.15)
Vibrio hemicentroti	Vibrionaceae.641	Vibrionales.135623	1.22071e+06	1	fig|1220705.6.peg.3686	fig|1220705.6.peg.3684	opposite strand	Hybrid peroxiredoxin hyPrx5 (EC 1.11.1.15)
Vibrio cholerae	Vibrionaceae.641	Vibrionales.135623	1.22415e+06	1	fig|1224154.5.peg.1004	fig|1224154.5.peg.1003	opposite strand	Hybrid peroxiredoxin hyPrx5 (EC 1.11.1.15)
Vibrio rotiferianus	Vibrionaceae.641	Vibrionales.135623	1.22474e+06	1	fig|1224743.3.peg.2877	fig|1224743.3.peg.2876	opposite strand	Hybrid peroxiredoxin hyPrx5 (EC 1.11.1.15)
Vibrio thalassae	Vibrionaceae.641	Vibrionales.135623	1.24301e+06	1	fig|1243014.3.peg.4690	fig|1243014.3.peg.4689	opposite strand	Hybrid peroxiredoxin hyPrx5 (EC 1.11.1.15)
Photobacterium leiognathi	Vibrionaceae.641	Vibrionales.135623	1.24823e+06	1	fig|1248232.3.peg.2695	fig|1248232.3.peg.2696	opposite strand	Hybrid peroxiredoxin hyPrx5 (EC 1.11.1.15)
Vibrio bivalvicida	Vibrionaceae.641	Vibrionales.135623	1.27689e+06	1	fig|1276888.3.peg.2965	fig|1276888.3.peg.2966	opposite strand	Hybrid peroxiredoxin hyPrx5 (EC 1.11.1.15)
Vibrio jasicida	Vibrionaceae.641	Vibrionales.135623	1.28e+06	1	fig|1280002.6.peg.2340	fig|1280002.6.peg.2339	opposite strand	Hybrid peroxiredoxin hyPrx5 (EC 1.11.1.15)
Photobacterium gaetbulicola	Vibrionaceae.641	Vibrionales.135623	1.29539e+06	1	fig|1295392.4.peg.4948	fig|1295392.4.peg.4949	opposite strand	Hybrid peroxiredoxin hyPrx5 (EC 1.11.1.15)
Vibrio fluvialis	Vibrionaceae.641	Vibrionales.135623	1.31531e+06	1	fig|1315313.17.peg.2099	fig|1315313.17.peg.2098	opposite strand	Hybrid peroxiredoxin hyPrx5 (EC 1.11.1.15)
Vibrio salilacus	Vibrionaceae.641	Vibrionales.135623	1.32375e+06	1	fig|1323749.3.peg.521	fig|1323749.3.peg.520	opposite strand	Hybrid peroxiredoxin hyPrx5 (EC 1.11.1.15)
Photobacterium sanctipauli	Vibrionaceae.641	Vibrionales.135623	1.34279e+06	1	fig|1342794.7.peg.4869	fig|1342794.7.peg.4870	opposite strand	Hybrid peroxiredoxin hyPrx5 (EC 1.11.1.15)
Vibrio lentus	Vibrionaceae.641	Vibrionales.135623	136469	1	fig|136468.91.peg.2553	fig|136468.91.peg.2551	opposite strand	Hybrid peroxiredoxin hyPrx5 (EC 1.11.1.15)
Photobacterium piscicola	Vibrionaceae.641	Vibrionales.135623	1.3783e+06	1	fig|1378299.3.peg.2426	fig|1378299.3.peg.2427	opposite strand	Hybrid peroxiredoxin hyPrx5 (EC 1.11.1.15)
Vibrio panuliri	Vibrionaceae.641	Vibrionales.135623	1.38108e+06	1	fig|1381081.7.peg.3961	fig|1381081.7.peg.3960	opposite strand	Hybrid peroxiredoxin hyPrx5 (EC 1.11.1.15)
Vibrio albensis	Vibrionaceae.641	Vibrionales.135623	1.40848e+06	1	fig|1408477.3.peg.874	fig|1408477.3.peg.873	opposite strand	Hybrid peroxiredoxin hyPrx5 (EC 1.11.1.15)
Vibrio tritonius	Vibrionaceae.641	Vibrionales.135623	1.43507e+06	1	fig|1435069.3.peg.2848	fig|1435069.3.peg.2849	opposite strand	Hybrid peroxiredoxin hyPrx5 (EC 1.11.1.15)
Vibrio metoecus	Vibrionaceae.641	Vibrionales.135623	1.48166e+06	1	fig|1481663.12.peg.3631	fig|1481663.12.peg.3630	opposite strand	Hybrid peroxiredoxin hyPrx5 (EC 1.11.1.15)
Vibrio astriarenae	Vibrionaceae.641	Vibrionales.135623	1.48192e+06	1	fig|1481923.3.peg.238	fig|1481923.3.peg.237	opposite strand	Hybrid peroxiredoxin hyPrx5 (EC 1.11.1.15)
Vibrio antiquarius	Vibrionaceae.641	Vibrionales.135623	150340	1	fig|150340.30.peg.3591	fig|150340.30.peg.3592	opposite strand	Hybrid peroxiredoxin hyPrx5 (EC 1.11.1.15)
Vibrio hyugaensis	Vibrionaceae.641	Vibrionales.135623	1.53474e+06	1	fig|1534743.8.peg.5139	fig|1534743.8.peg.5138	opposite strand	Hybrid peroxiredoxin hyPrx5 (EC 1.11.1.15)
Vibrio agarivorans	Vibrionaceae.641	Vibrionales.135623	153622	1	fig|153622.3.peg.4173	fig|153622.3.peg.4172	opposite strand	Hybrid peroxiredoxin hyPrx5 (EC 1.11.1.15)
Vibrio tapetis	Vibrionaceae.641	Vibrionales.135623	1.67187e+06	1	fig|1671868.3.peg.2936	fig|1671868.3.peg.2937	opposite strand	Hybrid peroxiredoxin hyPrx5 (EC 1.11.1.15)
Vibrio neptunius	Vibrionaceae.641	Vibrionales.135623	170652	1	fig|170651.7.peg.4590	fig|170651.7.peg.4591	opposite strand	Hybrid peroxiredoxin hyPrx5 (EC 1.11.1.15)
Vibrio chagasii	Vibrionaceae.641	Vibrionales.135623	170680	1	fig|170679.9.peg.1607	fig|170679.9.peg.1609	opposite strand	Hybrid peroxiredoxin hyPrx5 (EC 1.11.1.15)
Vibrio hepatarius	Vibrionaceae.641	Vibrionales.135623	171383	1	fig|171383.3.peg.3344	fig|171383.3.peg.3345	opposite strand	Hybrid peroxiredoxin hyPrx5 (EC 1.11.1.15)
Thaumasiovibrio occultus	Vibrionaceae.641	Vibrionales.135623	1.89118e+06	1	fig|1891184.3.peg.495	fig|1891184.3.peg.496	opposite strand	Hybrid peroxiredoxin hyPrx5 (EC 1.11.1.15)
Thaumasiovibrio subtropicus	Vibrionaceae.641	Vibrionales.135623	1.89121e+06	1	fig|1891207.3.peg.2298	fig|1891207.3.peg.2297	opposite strand	Hybrid peroxiredoxin hyPrx5 (EC 1.11.1.15)
Salinivibrio kushneri	Vibrionaceae.641	Vibrionales.135623	1.9082e+06	1	fig|1908198.16.peg.248	fig|1908198.16.peg.247	opposite strand	Hybrid peroxiredoxin hyPrx5 (EC 1.11.1.15)
Vibrio superstes	Vibrionaceae.641	Vibrionales.135623	198815	1	fig|198815.4.peg.1864	fig|198815.4.peg.1863	opposite strand	Hybrid peroxiredoxin hyPrx5 (EC 1.11.1.15)
Photobacterium carnosum	Vibrionaceae.641	Vibrionales.135623	2.02372e+06	1	fig|2023717.4.peg.3530	fig|2023717.4.peg.3531	opposite strand	Hybrid peroxiredoxin hyPrx5 (EC 1.11.1.15)
Vibrio crassostreae	Vibrionaceae.641	Vibrionales.135623	246167	1	fig|246167.40.peg.3614	fig|246167.40.peg.3615	opposite strand	Hybrid peroxiredoxin hyPrx5 (EC 1.11.1.15)
Vibrio chemaguriensis	Vibrionaceae.641	Vibrionales.135623	2.52767e+06	1	fig|2527672.3.peg.3040	fig|2527672.3.peg.3039	opposite strand	Hybrid peroxiredoxin hyPrx5 (EC 1.11.1.15)
Vibrio taketomensis	Vibrionaceae.641	Vibrionales.135623	2.57292e+06	1	fig|2572923.3.peg.236	fig|2572923.3.peg.235	opposite strand	Hybrid peroxiredoxin hyPrx5 (EC 1.11.1.15)
Photobacterium frigidiphilum	Vibrionaceae.641	Vibrionales.135623	264736	1	fig|264736.4.peg.4794	fig|264736.4.peg.4793	opposite strand	Hybrid peroxiredoxin hyPrx5 (EC 1.11.1.15)
Vibrio ponticus	Vibrionaceae.641	Vibrionales.135623	265669	1	fig|265668.7.peg.3396	fig|265668.7.peg.3395	opposite strand	Hybrid peroxiredoxin hyPrx5 (EC 1.11.1.15)
Photobacterium halotolerans	Vibrionaceae.641	Vibrionales.135623	265726	1	fig|265726.16.peg.2862	fig|265726.16.peg.2863	opposite strand	Hybrid peroxiredoxin hyPrx5 (EC 1.11.1.15)
Photobacterium lipolyticum	Vibrionaceae.641	Vibrionales.135623	266810	1	fig|266810.3.peg.4051	fig|266810.3.peg.4052	opposite strand	Hybrid peroxiredoxin hyPrx5 (EC 1.11.1.15)
Salinivibrio costicola	Vibrionaceae.641	Vibrionales.135623	272773	1	fig|272773.3.peg.244	fig|272773.3.peg.243	opposite strand	Hybrid peroxiredoxin hyPrx5 (EC 1.11.1.15)
Vibrio aestuarianus	Vibrionaceae.641	Vibrionales.135623	28171.1	1	fig|28171.11.peg.1873	fig|28171.11.peg.1874	opposite strand	Hybrid peroxiredoxin hyPrx5 (EC 1.11.1.15)
Enterovibrio coralii	Vibrionaceae.641	Vibrionales.135623	294935	1	fig|294935.3.peg.1185	fig|294935.3.peg.1184	opposite strand	Hybrid peroxiredoxin hyPrx5 (EC 1.11.1.15)
Vibrio gigantis	Vibrionaceae.641	Vibrionales.135623	296199	1	fig|296199.4.peg.3763	fig|296199.4.peg.3761	opposite strand	Hybrid peroxiredoxin hyPrx5 (EC 1.11.1.15)
Vibrio europaeus	Vibrionaceae.641	Vibrionales.135623	300876	1	fig|300876.5.peg.2064	fig|300876.5.peg.2063	opposite strand	Hybrid peroxiredoxin hyPrx5 (EC 1.11.1.15)
Photobacterium profundum	Vibrionaceae.641	Vibrionales.135623	314280	1	fig|314280.5.peg.5332	fig|314280.5.peg.5333	opposite strand	Hybrid peroxiredoxin hyPrx5 (EC 1.11.1.15)
Vibrio alginolyticus	Vibrionaceae.641	Vibrionales.135623	314289	1	fig|314288.6.peg.4103	fig|314288.6.peg.4104	opposite strand	Hybrid peroxiredoxin hyPrx5 (EC 1.11.1.15)
Vibrio ordalii	Vibrionaceae.641	Vibrionales.135623	314865	1	fig|314865.3.peg.1216	fig|314865.3.peg.1217	opposite strand	Hybrid peroxiredoxin hyPrx5 (EC 1.11.1.15)
Aliivibrio salmonicida	Vibrionaceae.641	Vibrionales.135623	316275	1	fig|316275.15.peg.2946	fig|316275.15.peg.2945	opposite strand	Hybrid peroxiredoxin hyPrx5 (EC 1.11.1.15)
Photobacterium kishitanii	Vibrionaceae.641	Vibrionales.135623	318457	1	fig|318456.8.peg.642	fig|318456.8.peg.643	opposite strand	Hybrid peroxiredoxin hyPrx5 (EC 1.11.1.15)
Photobacterium ganghwense	Vibrionaceae.641	Vibrionales.135623	320778	1	fig|320778.3.peg.4451	fig|320778.3.peg.4452	opposite strand	Hybrid peroxiredoxin hyPrx5 (EC 1.11.1.15)
Salinivibrio proteolyticus	Vibrionaceae.641	Vibrionales.135623	334715	1	fig|334715.3.peg.2097	fig|334715.3.peg.2096	opposite strand	Hybrid peroxiredoxin hyPrx5 (EC 1.11.1.15)
Vibrio sinaloensis	Vibrionaceae.641	Vibrionales.135623	379098	1	fig|379097.8.peg.3382	fig|379097.8.peg.3381	opposite strand	Hybrid peroxiredoxin hyPrx5 (EC 1.11.1.15)
Photobacterium damselae	Vibrionaceae.641	Vibrionales.135623	38293.5	1	fig|38293.47.peg.514	fig|38293.47.peg.515	opposite strand	Hybrid peroxiredoxin hyPrx5 (EC 1.11.1.15)
Vibrio fischeri	Vibrionaceae.641	Vibrionales.135623	388396	1	fig|388396.11.peg.2323	fig|388396.11.peg.2324	opposite strand	Hybrid peroxiredoxin hyPrx5 (EC 1.11.1.15)
Salinivibrio sharmensis	Vibrionaceae.641	Vibrionales.135623	390883	1	fig|390883.3.peg.2460	fig|390883.3.peg.2458	opposite strand	Hybrid peroxiredoxin hyPrx5 (EC 1.11.1.15)
Salinivibrio siamensis	Vibrionaceae.641	Vibrionales.135623	414286	1	fig|414286.3.peg.1350	fig|414286.3.peg.1349	opposite strand	Hybrid peroxiredoxin hyPrx5 (EC 1.11.1.15)
Vibrio celticus	Vibrionaceae.641	Vibrionales.135623	446373	1	fig|446372.6.peg.3186	fig|446372.6.peg.3188	opposite strand	Hybrid peroxiredoxin hyPrx5 (EC 1.11.1.15)
Vibrio scophthalmi	Vibrionaceae.641	Vibrionales.135623	45658.8	1	fig|45658.8.peg.240	fig|45658.8.peg.239	opposite strand	Hybrid peroxiredoxin hyPrx5 (EC 1.11.1.15)
Vibrio mangrovi	Vibrionaceae.641	Vibrionales.135623	474394	1	fig|474394.4.peg.4055	fig|474394.4.peg.4054	opposite strand	Hybrid peroxiredoxin hyPrx5 (EC 1.11.1.15)
Vibrio diabolicus	Vibrionaceae.641	Vibrionales.135623	50719.6	1	fig|50719.59.peg.145	fig|50719.59.peg.146	opposite strand	Hybrid peroxiredoxin hyPrx5 (EC 1.11.1.15)
Aliivibrio finisterrensis	Vibrionaceae.641	Vibrionales.135623	511998	1	fig|511998.14.peg.1157	fig|511998.14.peg.1158	opposite strand	Hybrid peroxiredoxin hyPrx5 (EC 1.11.1.15)
Photobacterium aquimaris	Vibrionaceae.641	Vibrionales.135623	512643	1	fig|512643.12.peg.1551	fig|512643.12.peg.1550	opposite strand	Hybrid peroxiredoxin hyPrx5 (EC 1.11.1.15)
Vibrio ostreicida	Vibrionaceae.641	Vibrionales.135623	526588	1	fig|526588.4.peg.3674	fig|526588.4.peg.3675	opposite strand	Hybrid peroxiredoxin hyPrx5 (EC 1.11.1.15)
Vibrio gallaecicus	Vibrionaceae.641	Vibrionales.135623	552386	1	fig|552386.3.peg.1031	fig|552386.3.peg.1030	opposite strand	Hybrid peroxiredoxin hyPrx5 (EC 1.11.1.15)
Vibrio atypicus	Vibrionaceae.641	Vibrionales.135623	558271	1	fig|558271.4.peg.3466	fig|558271.4.peg.3465	opposite strand	Hybrid peroxiredoxin hyPrx5 (EC 1.11.1.15)
Photobacterium iliopiscarium	Vibrionaceae.641	Vibrionales.135623	56192.2	1	fig|56192.18.peg.869	fig|56192.18.peg.870	opposite strand	Hybrid peroxiredoxin hyPrx5 (EC 1.11.1.15)
Aliivibrio sifiae	Vibrionaceae.641	Vibrionales.135623	566294	1	fig|566293.5.peg.2160	fig|566293.5.peg.2161	opposite strand	Hybrid peroxiredoxin hyPrx5 (EC 1.11.1.15)
Vibrio galatheae	Vibrionaceae.641	Vibrionales.135623	579748	1	fig|579748.3.peg.2596	fig|579748.3.peg.2595	opposite strand	Hybrid peroxiredoxin hyPrx5 (EC 1.11.1.15)
Vibrio shilonii	Vibrionaceae.641	Vibrionales.135623	62153.8	1	fig|62153.8.peg.950	fig|62153.8.peg.951	opposite strand	Hybrid peroxiredoxin hyPrx5 (EC 1.11.1.15)
Vibrio pectenicida	Vibrionaceae.641	Vibrionales.135623	62763.3	1	fig|62763.3.peg.128	fig|62763.3.peg.127	opposite strand	Hybrid peroxiredoxin hyPrx5 (EC 1.11.1.15)
Grimontia marina	Vibrionaceae.641	Vibrionales.135623	646534	1	fig|646534.3.peg.1341	fig|646534.3.peg.1340	opposite strand	Hybrid peroxiredoxin hyPrx5 (EC 1.11.1.15)
Photobacterium phosphoreum	Vibrionaceae.641	Vibrionales.135623	659.11	1	fig|659.11.peg.2313	fig|659.11.peg.2314	opposite strand	Hybrid peroxiredoxin hyPrx5 (EC 1.11.1.15)
Photobacterium angustum	Vibrionaceae.641	Vibrionales.135623	661.34	1	fig|661.34.peg.4234	fig|661.34.peg.4235	opposite strand	Hybrid peroxiredoxin hyPrx5 (EC 1.11.1.15)
Vibrio harveyi	Vibrionaceae.641	Vibrionales.135623	673519	1	fig|673519.3.peg.2362	fig|673519.3.peg.2361	opposite strand	Hybrid peroxiredoxin hyPrx5 (EC 1.11.1.15)
Vibrio cincinnatiensis	Vibrionaceae.641	Vibrionales.135623	675.6	1	fig|675.6.peg.218	fig|675.6.peg.217	opposite strand	Hybrid peroxiredoxin hyPrx5 (EC 1.11.1.15)
Vibrio furnissii	Vibrionaceae.641	Vibrionales.135623	675811	1	fig|675811.4.peg.3812	fig|675811.4.peg.3811	opposite strand	Hybrid peroxiredoxin hyPrx5 (EC 1.11.1.15)
Grimontia hollisae	Vibrionaceae.641	Vibrionales.135623	675812	1	fig|675812.3.peg.413	fig|675812.3.peg.414	opposite strand	Hybrid peroxiredoxin hyPrx5 (EC 1.11.1.15)
Vibrio coralliilyticus	Vibrionaceae.641	Vibrionales.135623	675814	1	fig|675814.3.peg.88	fig|675814.3.peg.89	opposite strand	Hybrid peroxiredoxin hyPrx5 (EC 1.11.1.15)
Vibrio orientalis	Vibrionaceae.641	Vibrionales.135623	675816	1	fig|675816.3.peg.4186	fig|675816.3.peg.4187	opposite strand	Hybrid peroxiredoxin hyPrx5 (EC 1.11.1.15)
Vibrio campbellii	Vibrionaceae.641	Vibrionales.135623	680.25	1	fig|680.25.peg.2215	fig|680.25.peg.2216	opposite strand	Hybrid peroxiredoxin hyPrx5 (EC 1.11.1.15)
Photobacterium swingsii	Vibrionaceae.641	Vibrionales.135623	680026	1	fig|680026.4.peg.2727	fig|680026.4.peg.2726	opposite strand	Hybrid peroxiredoxin hyPrx5 (EC 1.11.1.15)
Aliivibrio logei	Vibrionaceae.641	Vibrionales.135623	688.15	1	fig|688.15.peg.781	fig|688.15.peg.782	opposite strand	Hybrid peroxiredoxin hyPrx5 (EC 1.11.1.15)
Vibrio atlanticus	Vibrionaceae.641	Vibrionales.135623	693153	1	fig|693153.4.peg.1004	fig|693153.4.peg.1006	opposite strand	Hybrid peroxiredoxin hyPrx5 (EC 1.11.1.15)
Vibrio owensii	Vibrionaceae.641	Vibrionales.135623	696485	1	fig|696485.18.peg.824	fig|696485.18.peg.825	opposite strand	Hybrid peroxiredoxin hyPrx5 (EC 1.11.1.15)
Vibrio caribbeanicus	Vibrionaceae.641	Vibrionales.135623	701175	1	fig|701175.3.peg.3885	fig|701175.3.peg.3884	opposite strand	Hybrid peroxiredoxin hyPrx5 (EC 1.11.1.15)
Vibrio inhibens	Vibrionaceae.641	Vibrionales.135623	745713	1	fig|745713.3.peg.3876	fig|745713.3.peg.3877	opposite strand	Hybrid peroxiredoxin hyPrx5 (EC 1.11.1.15)
Aliivibrio wodanis	Vibrionaceae.641	Vibrionales.135623	80852.2	1	fig|80852.17.peg.307	fig|80852.17.peg.306	opposite strand	Hybrid peroxiredoxin hyPrx5 (EC 1.11.1.15)
Photobacterium indicum	Vibrionaceae.641	Vibrionales.135623	81447.4	1	fig|81447.4.peg.4801	fig|81447.4.peg.4800	opposite strand	Hybrid peroxiredoxin hyPrx5 (EC 1.11.1.15)
Photobacterium jeanii	Vibrionaceae.641	Vibrionales.135623	858641	1	fig|858640.7.peg.4140	fig|858640.7.peg.4139	opposite strand	Hybrid peroxiredoxin hyPrx5 (EC 1.11.1.15)
Vibrio xiamenensis	Vibrionaceae.641	Vibrionales.135623	861298	1	fig|861298.3.peg.3144	fig|861298.3.peg.3146	opposite strand	Hybrid peroxiredoxin hyPrx5 (EC 1.11.1.15)
Vibrio ichthyoenteri	Vibrionaceae.641	Vibrionales.135623	870968	1	fig|870968.3.peg.4175	fig|870968.3.peg.4174	opposite strand	Hybrid peroxiredoxin hyPrx5 (EC 1.11.1.15)
Vibrio anguillarum	Vibrionaceae.641	Vibrionales.135623	882102	1	fig|882102.3.peg.549	fig|882102.3.peg.548	opposite strand	Hybrid peroxiredoxin hyPrx5 (EC 1.11.1.15)
Vibrio brasiliensis	Vibrionaceae.641	Vibrionales.135623	945543	1	fig|945543.3.peg.3673	fig|945543.3.peg.3674	opposite strand	Hybrid peroxiredoxin hyPrx5 (EC 1.11.1.15)
Vibrio maritimus	Vibrionaceae.641	Vibrionales.135623	990268	1	fig|990268.12.peg.3544	fig|990268.12.peg.3543	opposite strand	Hybrid peroxiredoxin hyPrx5 (EC 1.11.1.15)
Vibrio litoralis	Vibrionaceae.641	Vibrionales.135623	1.12349e+06	1	fig|1123493.3.peg.2966	fig|1123493.3.peg.2965	same strand	Tetrapartite efflux system, inner membrane component FusBC-like
Vibrio rumoiensis	Vibrionaceae.641	Vibrionales.135623	1.18825e+06	1	fig|1188252.3.peg.1751	fig|1188252.3.peg.1750	same strand	Tetrapartite efflux system, inner membrane component FusBC-like
Vibrio algivorus	Vibrionaceae.641	Vibrionales.135623	1.66702e+06	1	fig|1667024.9.peg.3397	fig|1667024.9.peg.3399	same strand	Tetrapartite efflux system, inner membrane component FusBC-like
Vibrio cidicii	Vibrionaceae.641	Vibrionales.135623	1.76388e+06	1	fig|1763883.7.peg.1392	fig|1763883.7.peg.1394	same strand	Argininosuccinate lyase (EC 4.3.2.1) / N-acetylglutamate synthase (EC 2.3.1.1)
Vibrio gangliei	Vibrionaceae.641	Vibrionales.135623	2.07709e+06	1	fig|2077090.3.peg.2290	fig|2077090.3.peg.2288	same strand	Tetrapartite efflux system, inner membrane component FusBC-like
Vibrio ezurae	Vibrionaceae.641	Vibrionales.135623	252584	1	fig|252583.6.peg.2559	fig|252583.6.peg.2561	same strand	Argininosuccinate lyase (EC 4.3.2.1) / N-acetylglutamate synthase (EC 2.3.1.1)
Vibrio metschnikovii	Vibrionaceae.641	Vibrionales.135623	28172.6	1	fig|28172.6.peg.3207	fig|28172.6.peg.3209	same strand	Argininosuccinate lyase (EC 4.3.2.1) / N-acetylglutamate synthase (EC 2.3.1.1)
Vibrio navarrensis	Vibrionaceae.641	Vibrionales.135623	29495.1	1	fig|29495.13.peg.1485	fig|29495.13.peg.1488	same strand	Argininosuccinate lyase (EC 4.3.2.1) / N-acetylglutamate synthase (EC 2.3.1.1)
Vibrio mytili	Vibrionaceae.641	Vibrionales.135623	50718.3	1	fig|50718.3.peg.1277	fig|50718.3.peg.1278	same strand	Argininosuccinate lyase (EC 4.3.2.1) / N-acetylglutamate synthase (EC 2.3.1.1)
Vibrio plantisponsor	Vibrionaceae.641	Vibrionales.135623	664643	1	fig|664643.4.peg.3968	fig|664643.4.peg.3966	same strand	Argininosuccinate lyase (EC 4.3.2.1) / N-acetylglutamate synthase (EC 2.3.1.1)
Vibrio casei	Vibrionaceae.641	Vibrionales.135623	673372	1	fig|673372.10.peg.231	fig|673372.10.peg.230	same strand	Tetrapartite efflux system, inner membrane component FusBC-like
Vibrio diazotrophicus	Vibrionaceae.641	Vibrionales.135623	685.6	1	fig|685.6.peg.1145	fig|685.6.peg.1143	same strand	Argininosuccinate lyase (EC 4.3.2.1) / N-acetylglutamate synthase (EC 2.3.1.1)
Vibrio halioticoli	Vibrionaceae.641	Vibrionales.135623	71388.4	1	fig|71388.4.peg.2055	fig|71388.4.peg.2057	same strand	Argininosuccinate lyase (EC 4.3.2.1) / N-acetylglutamate synthase (EC 2.3.1.1)
Dokdonella koreensis	Rhodanobacteraceae.1775411	Xanthomonadales.135614	1.30034e+06	1	fig|1300342.5.peg.725	fig|1300342.5.peg.726	opposite strand	hypothetical protein
Dyella japonica	Rhodanobacteraceae.1775411	Xanthomonadales.135614	1.44076e+06	1	fig|1440762.4.peg.629	fig|1440762.4.peg.627	opposite strand	Membrane alanine aminopeptidase N (EC 3.4.11.2)
Mizugakiibacter sediminis	Rhodanobacteraceae.1775411	Xanthomonadales.135614	1.47548e+06	1	fig|1475481.14.peg.1382	fig|1475481.14.peg.1381	opposite strand	Alkyl hydroperoxide reductase protein C (EC 1.11.1.15)
Luteibacter pinisoli	Rhodanobacteraceae.1775411	Xanthomonadales.135614	2.58908e+06	1	fig|2589080.3.peg.3403	fig|2589080.3.peg.3402	opposite strand	Alkyl hydroperoxide reductase protein C (EC 1.11.1.15)
Dokdonella fugitiva	Rhodanobacteraceae.1775411	Xanthomonadales.135614	328517	1	fig|328517.3.peg.2715	fig|328517.3.peg.2714	opposite strand	Alkyl hydroperoxide reductase protein C (EC 1.11.1.15)
Tahibacter aquaticus	Rhodanobacteraceae.1775411	Xanthomonadales.135614	520092	1	fig|520092.4.peg.255	fig|520092.4.peg.254	opposite strand	Alkyl hydroperoxide reductase protein C (EC 1.11.1.15)
Rudaea cellulosilytica	Rhodanobacteraceae.1775411	Xanthomonadales.135614	1.12307e+06	1	fig|1123073.3.peg.191	fig|1123073.3.peg.192	same strand	Alkyl hydroperoxide reductase protein F
Aquimonas voraii	Rhodanobacteraceae.1775411	Xanthomonadales.135614	265720	1	fig|265719.9.peg.2840	fig|265719.9.peg.2841	same strand	hypothetical protein
Pseudofulvimonas gallinarii	Rhodanobacteraceae.1775411	Xanthomonadales.135614	634155	1	fig|634155.4.peg.2749	fig|634155.4.peg.2750	same strand	Alkyl hydroperoxide reductase protein F
Arenimonas composti	Xanthomonadaceae.32033	Xanthomonadales.135614	1.12101e+06	1	fig|1121013.3.peg.1387	fig|1121013.3.peg.1386	opposite strand	Alkyl hydroperoxide reductase protein C (EC 1.11.1.15)
Arenimonas donghaensis	Xanthomonadaceae.32033	Xanthomonadales.135614	1.12101e+06	1	fig|1121014.3.peg.1427	fig|1121014.3.peg.1428	opposite strand	Alkyl hydroperoxide reductase protein C (EC 1.11.1.15)
Arenimonas oryziterrae	Xanthomonadaceae.32033	Xanthomonadales.135614	1.12102e+06	1	fig|1121015.3.peg.565	fig|1121015.3.peg.564	opposite strand	Alkyl hydroperoxide reductase protein C (EC 1.11.1.15)
Silanimonas lenta	Xanthomonadaceae.32033	Xanthomonadales.135614	1.12325e+06	1	fig|1123253.3.peg.976	fig|1123253.3.peg.977	opposite strand	Alkyl hydroperoxide reductase protein C (EC 1.11.1.15)
Vulcaniibacterium thermophilum	Xanthomonadaceae.32033	Xanthomonadales.135614	1.16991e+06	1	fig|1169913.3.peg.54	fig|1169913.3.peg.55	opposite strand	Alkyl hydroperoxide reductase protein C (EC 1.11.1.15)
Lysobacter dokdonensis	Xanthomonadaceae.32033	Xanthomonadales.135614	1.30035e+06	1	fig|1300345.3.peg.1373	fig|1300345.3.peg.1372	opposite strand	Alkyl hydroperoxide reductase protein C (EC 1.11.1.15)
Arenimonas malthae	Xanthomonadaceae.32033	Xanthomonadales.135614	1.38405e+06	1	fig|1384054.3.peg.930	fig|1384054.3.peg.931	opposite strand	Alkyl hydroperoxide reductase protein C (EC 1.11.1.15)
Arenimonas metalli	Xanthomonadaceae.32033	Xanthomonadales.135614	1.38406e+06	1	fig|1384056.3.peg.401	fig|1384056.3.peg.402	opposite strand	Alkyl hydroperoxide reductase protein C (EC 1.11.1.15)
Lysobacter capsici	Xanthomonadaceae.32033	Xanthomonadales.135614	1.44432e+06	1	fig|1444315.4.peg.5325	fig|1444315.4.peg.5326	opposite strand	Alkyl hydroperoxide reductase protein C (EC 1.11.1.15)
Lysobacter gummosus	Xanthomonadaceae.32033	Xanthomonadales.135614	262324	1	fig|262324.5.peg.3808	fig|262324.5.peg.3807	opposite strand	Alkyl hydroperoxide reductase protein C (EC 1.11.1.15)
Arenimonas daejeonensis	Xanthomonadaceae.32033	Xanthomonadales.135614	370777	1	fig|370777.3.peg.1753	fig|370777.3.peg.1754	opposite strand	Alkyl hydroperoxide reductase protein C (EC 1.11.1.15)
Lysobacter enzymogenes	Xanthomonadaceae.32033	Xanthomonadales.135614	69.16	1	fig|69.16.peg.4778	fig|69.16.peg.4779	opposite strand	Alkyl hydroperoxide reductase protein C (EC 1.11.1.15)
Lysobacter antibioticus	Xanthomonadaceae.32033	Xanthomonadales.135614	84531.4	1	fig|84531.4.peg.4439	fig|84531.4.peg.4438	opposite strand	Alkyl hydroperoxide reductase protein C (EC 1.11.1.15)
Luteimonas cucumeris	Xanthomonadaceae.32033	Xanthomonadales.135614	985012	1	fig|985012.3.peg.1798	fig|985012.3.peg.1797	opposite strand	Alkyl hydroperoxide reductase protein C (EC 1.11.1.15)
Pseudoxanthomonas spadix	Xanthomonadaceae.32033	Xanthomonadales.135614	1.04586e+06	1	fig|1045855.3.peg.2417	fig|1045855.3.peg.2416	same strand	Alkyl hydroperoxide reductase protein F
Pseudoxanthomonas wuyuanensis	Xanthomonadaceae.32033	Xanthomonadales.135614	1.0732e+06	1	fig|1073196.3.peg.1163	fig|1073196.3.peg.1162	same strand	Alkyl hydroperoxide reductase protein F
Xanthomonas cynarae	Xanthomonadaceae.32033	Xanthomonadales.135614	109214	1	fig|109214.3.peg.72	fig|109214.3.peg.73	same strand	Alkyl hydroperoxide reductase protein F
Luteimonas mephitis	Xanthomonadaceae.32033	Xanthomonadales.135614	1.12218e+06	1	fig|1122183.3.peg.116	fig|1122183.3.peg.115	same strand	Alkyl hydroperoxide reductase protein F
Lysobacter concretionis	Xanthomonadaceae.32033	Xanthomonadales.135614	1.12219e+06	1	fig|1122185.3.peg.2568	fig|1122185.3.peg.2567	same strand	Alkyl hydroperoxide reductase protein F
Lysobacter defluvii	Xanthomonadaceae.32033	Xanthomonadales.135614	1.12219e+06	1	fig|1122186.3.peg.1822	fig|1122186.3.peg.1821	same strand	Alkyl hydroperoxide reductase protein F
Lysobacter spongiicola	Xanthomonadaceae.32033	Xanthomonadales.135614	1.12219e+06	1	fig|1122188.5.peg.595	fig|1122188.5.peg.596	same strand	Alkyl hydroperoxide reductase protein F
Xanthomonas fragariae	Xanthomonadaceae.32033	Xanthomonadales.135614	1.13145e+06	1	fig|1131451.6.peg.3231	fig|1131451.6.peg.3230	same strand	Alkyl hydroperoxide reductase protein F
Xanthomonas translucens	Xanthomonadaceae.32033	Xanthomonadales.135614	1.20575e+06	1	fig|1205753.3.peg.3626	fig|1205753.3.peg.3625	same strand	Alkyl hydroperoxide reductase protein F
Xanthomonas cassavae	Xanthomonadaceae.32033	Xanthomonadales.135614	1.21938e+06	1	fig|1219375.3.peg.1135	fig|1219375.3.peg.1136	same strand	Alkyl hydroperoxide reductase protein F
Xanthomonas citri	Xanthomonadaceae.32033	Xanthomonadales.135614	1.22003e+06	1	fig|1220027.3.peg.1007	fig|1220027.3.peg.1008	same strand	Alkyl hydroperoxide reductase protein F
Luteimonas abyssi	Xanthomonadaceae.32033	Xanthomonadales.135614	1.24751e+06	1	fig|1247514.3.peg.2457	fig|1247514.3.peg.2456	same strand	Alkyl hydroperoxide reductase protein F
Lysobacter panacisoli	Xanthomonadaceae.32033	Xanthomonadales.135614	1.25526e+06	1	fig|1255263.3.peg.471	fig|1255263.3.peg.470	same strand	Alkyl hydroperoxide reductase protein F
Vulcaniibacterium tengchongense	Xanthomonadaceae.32033	Xanthomonadales.135614	1.27343e+06	1	fig|1273429.3.peg.3061	fig|1273429.3.peg.3062	same strand	Alkyl hydroperoxide reductase protein F
Stenotrophomonas maltophilia	Xanthomonadaceae.32033	Xanthomonadales.135614	1.27902e+06	1	fig|1279018.5.peg.2772	fig|1279018.5.peg.2773	same strand	Alkyl hydroperoxide reductase protein F
Xanthomonas campestris	Xanthomonadaceae.32033	Xanthomonadales.135614	1.28128e+06	1	fig|1281282.5.peg.3564	fig|1281282.5.peg.3563	same strand	Alkyl hydroperoxide reductase protein F
Stenotrophomonas acidaminiphila	Xanthomonadaceae.32033	Xanthomonadales.135614	128781	1	fig|128780.78.peg.2445	fig|128780.78.peg.2444	same strand	Alkyl hydroperoxide reductase protein F
Pseudoxanthomonas mexicana	Xanthomonadaceae.32033	Xanthomonadales.135614	128785	1	fig|128785.3.peg.898	fig|128785.3.peg.897	same strand	Alkyl hydroperoxide reductase protein F
Xanthomonas oryzae	Xanthomonadaceae.32033	Xanthomonadales.135614	1.3133e+06	1	fig|1313303.3.peg.2879	fig|1313303.3.peg.2880	same strand	Alkyl hydroperoxide reductase protein F
Xanthomonas maliensis	Xanthomonadaceae.32033	Xanthomonadales.135614	1.32137e+06	1	fig|1321368.6.peg.3274	fig|1321368.6.peg.3273	same strand	Alkyl hydroperoxide reductase protein F
Lysobacter lycopersici	Xanthomonadaceae.32033	Xanthomonadales.135614	1.3248e+06	1	fig|1324796.3.peg.2494	fig|1324796.3.peg.2495	same strand	Lactoylglutathione lyase
Xanthomonas axonopodis	Xanthomonadaceae.32033	Xanthomonadales.135614	1.36565e+06	1	fig|1365649.5.peg.1061	fig|1365649.5.peg.1062	same strand	Alkyl hydroperoxide reductase protein F
Pseudoxanthomonas gei	Xanthomonadaceae.32033	Xanthomonadales.135614	1.38303e+06	1	fig|1383030.3.peg.240	fig|1383030.3.peg.241	same strand	Alkyl hydroperoxide reductase protein F
Lysobacter daejeonensis	Xanthomonadaceae.32033	Xanthomonadales.135614	1.38552e+06	1	fig|1385517.3.peg.2153	fig|1385517.3.peg.2152	same strand	Alkyl hydroperoxide reductase protein F
Xanthomonas arboricola	Xanthomonadaceae.32033	Xanthomonadales.135614	1.43206e+06	1	fig|1432057.3.peg.3811	fig|1432057.3.peg.3812	same strand	Alkyl hydroperoxide reductase protein F
Luteimonas huabeiensis	Xanthomonadaceae.32033	Xanthomonadales.135614	1.4426e+06	1	fig|1442599.3.peg.2775	fig|1442599.3.peg.2774	same strand	Alkyl hydroperoxide reductase protein F
Xylella taiwanensis	Xanthomonadaceae.32033	Xanthomonadales.135614	1.44477e+06	1	fig|1444770.13.peg.2305	fig|1444770.13.peg.2306	same strand	Alkyl hydroperoxide reductase protein F
Stenotrophomonas bentonitica	Xanthomonadaceae.32033	Xanthomonadales.135614	1.45013e+06	1	fig|1450134.7.peg.3233	fig|1450134.7.peg.3232	same strand	Alkyl hydroperoxide reductase protein F
Pseudoxanthomonas sangjuensis	Xanthomonadaceae.32033	Xanthomonadales.135614	1.50375e+06	1	fig|1503750.3.peg.1740	fig|1503750.3.peg.1741	same strand	Alkyl hydroperoxide reductase protein F
Luteimonas terrae	Xanthomonadaceae.32033	Xanthomonadales.135614	1.53019e+06	1	fig|1530191.3.peg.2747	fig|1530191.3.peg.2748	same strand	Alkyl hydroperoxide reductase protein F
Luteimonas arsenica	Xanthomonadaceae.32033	Xanthomonadales.135614	1.58624e+06	1	fig|1586242.3.peg.2196	fig|1586242.3.peg.2197	same strand	Alkyl hydroperoxide reductase protein F
Luteimonas tolerans	Xanthomonadaceae.32033	Xanthomonadales.135614	1.60433e+06	1	fig|1604334.3.peg.1311	fig|1604334.3.peg.1310	same strand	Alkyl hydroperoxide reductase protein F
Lysobacter maris	Xanthomonadaceae.32033	Xanthomonadales.135614	1.60589e+06	1	fig|1605891.3.peg.2711	fig|1605891.3.peg.2710	same strand	Alkyl hydroperoxide reductase protein F
Lysobacter aestuarii	Xanthomonadaceae.32033	Xanthomonadales.135614	1.7062e+06	1	fig|1706195.3.peg.1802	fig|1706195.3.peg.1804	same strand	Alkyl hydroperoxide reductase protein F
Xanthomonas massiliensis	Xanthomonadaceae.32033	Xanthomonadales.135614	1.7203e+06	1	fig|1720302.6.peg.2647	fig|1720302.6.peg.2646	same strand	Alkyl hydroperoxide reductase protein F
Pseudoxanthomonas taiwanensis	Xanthomonadaceae.32033	Xanthomonadales.135614	176598	1	fig|176598.4.peg.2266	fig|176598.4.peg.2267	same strand	Alkyl hydroperoxide reductase protein F
Xylella fastidiosa	Xanthomonadaceae.32033	Xanthomonadales.135614	183190	1	fig|183190.5.peg.965	fig|183190.5.peg.964	same strand	Alkyl hydroperoxide reductase protein F
Xanthomonas floridensis	Xanthomonadaceae.32033	Xanthomonadales.135614	1.84358e+06	1	fig|1843580.5.peg.1778	fig|1843580.5.peg.1779	same strand	Alkyl hydroperoxide reductase protein F
Xanthomonas nasturtii	Xanthomonadaceae.32033	Xanthomonadales.135614	1.84358e+06	1	fig|1843581.5.peg.3445	fig|1843581.5.peg.3446	same strand	Alkyl hydroperoxide reductase protein F
Stenotrophomonas indicatrix	Xanthomonadaceae.32033	Xanthomonadales.135614	2.04545e+06	1	fig|2045451.27.peg.1895	fig|2045451.27.peg.1894	same strand	Alkyl hydroperoxide reductase protein F
Thermomonas hydrothermalis	Xanthomonadaceae.32033	Xanthomonadales.135614	213589	1	fig|213588.7.peg.2074	fig|213588.7.peg.2075	same strand	Alkyl hydroperoxide reductase protein F
Thermomonas fusca	Xanthomonadaceae.32033	Xanthomonadales.135614	215690	1	fig|215690.3.peg.2227	fig|215690.3.peg.2226	same strand	Lactoylglutathione lyase
Stenotrophomonas rhizophila	Xanthomonadaceae.32033	Xanthomonadales.135614	216778	1	fig|216778.40.peg.137	fig|216778.40.peg.138	same strand	Alkyl hydroperoxide reductase protein F
Xanthomonas sontii	Xanthomonadaceae.32033	Xanthomonadales.135614	2.65075e+06	1	fig|2650745.3.peg.4069	fig|2650745.3.peg.4068	same strand	Alkyl hydroperoxide reductase protein F
Pseudoxanthomonas koreensis	Xanthomonadaceae.32033	Xanthomonadales.135614	266061	1	fig|266061.3.peg.2209	fig|266061.3.peg.2208	same strand	Alkyl hydroperoxide reductase protein F
Pseudoxanthomonas daejeonensis	Xanthomonadaceae.32033	Xanthomonadales.135614	266062	1	fig|266062.3.peg.657	fig|266062.3.peg.658	same strand	Alkyl hydroperoxide reductase protein F
Stenotrophomonas koreensis	Xanthomonadaceae.32033	Xanthomonadales.135614	266128	1	fig|266128.3.peg.1632	fig|266128.3.peg.1631	same strand	Alkyl hydroperoxide reductase protein F
Pseudoxanthomonas kaohsiungensis	Xanthomonadaceae.32033	Xanthomonadales.135614	283923	1	fig|283923.3.peg.2454	fig|283923.3.peg.2456	same strand	Alkyl hydroperoxide reductase protein F
Xanthomonas albilineans	Xanthomonadaceae.32033	Xanthomonadales.135614	29447.2	1	fig|29447.22.peg.2748	fig|29447.22.peg.2749	same strand	Alkyl hydroperoxide reductase protein F
Xanthomonas retroflexus	Xanthomonadaceae.32033	Xanthomonadales.135614	305960	1	fig|305959.7.peg.2397	fig|305959.7.peg.2398	same strand	Alkyl hydroperoxide reductase protein F
Pseudoxanthomonas suwonensis	Xanthomonadaceae.32033	Xanthomonadales.135614	314722	1	fig|314722.10.peg.1904	fig|314722.10.peg.1905	same strand	Alkyl hydroperoxide reductase protein F
Stenotrophomonas ginsengisoli	Xanthomonadaceae.32033	Xanthomonadales.135614	336566	1	fig|336566.3.peg.960	fig|336566.3.peg.961	same strand	Alkyl hydroperoxide reductase protein F
Xanthomonas alfalfae	Xanthomonadaceae.32033	Xanthomonadales.135614	366650	1	fig|366650.4.peg.1765	fig|366650.4.peg.1764	same strand	Alkyl hydroperoxide reductase protein F
Pseudoxanthomonas yeongjuensis	Xanthomonadaceae.32033	Xanthomonadales.135614	377616	1	fig|377616.3.peg.109	fig|377616.3.peg.110	same strand	Alkyl hydroperoxide reductase protein F
Stenotrophomonas humi	Xanthomonadaceae.32033	Xanthomonadales.135614	405444	1	fig|405444.3.peg.490	fig|405444.3.peg.491	same strand	Alkyl hydroperoxide reductase protein F
Xanthomonas fuscans	Xanthomonadaceae.32033	Xanthomonadales.135614	427081	1	fig|427081.3.peg.2309	fig|427081.3.peg.2308	same strand	Alkyl hydroperoxide reductase protein F
Pseudoxanthomonas indica	Xanthomonadaceae.32033	Xanthomonadales.135614	428993	1	fig|428993.3.peg.2473	fig|428993.3.peg.2472	same strand	Alkyl hydroperoxide reductase protein F
Pseudoxanthomonas sacheonensis	Xanthomonadaceae.32033	Xanthomonadales.135614	443615	1	fig|443615.3.peg.1520	fig|443615.3.peg.1521	same strand	Alkyl hydroperoxide reductase protein F
Lysobacter soli	Xanthomonadaceae.32033	Xanthomonadales.135614	453783	1	fig|453783.3.peg.964	fig|453783.3.peg.963	same strand	Alkyl hydroperoxide reductase protein F
Luteimonas aestuarii	Xanthomonadaceae.32033	Xanthomonadales.135614	453837	1	fig|453837.3.peg.424	fig|453837.3.peg.425	same strand	Alkyl hydroperoxide reductase protein F
Xanthomonas euvesicatoria	Xanthomonadaceae.32033	Xanthomonadales.135614	456327	1	fig|456327.19.peg.4186	fig|456327.19.peg.4187	same strand	Alkyl hydroperoxide reductase protein F
Stenotrophomonas pavanii	Xanthomonadaceae.32033	Xanthomonadales.135614	487699	1	fig|487698.8.peg.92	fig|487698.8.peg.91	same strand	Alkyl hydroperoxide reductase protein F
Luteimonas marina	Xanthomonadaceae.32033	Xanthomonadales.135614	488485	1	fig|488485.3.peg.1799	fig|488485.3.peg.1800	same strand	Alkyl hydroperoxide reductase protein F
Stenotrophomonas chelatiphaga	Xanthomonadaceae.32033	Xanthomonadales.135614	517011	1	fig|517011.3.peg.3587	fig|517011.3.peg.3588	same strand	Alkyl hydroperoxide reductase protein F
Xanthomonas populi	Xanthomonadaceae.32033	Xanthomonadales.135614	53414.3	1	fig|53414.3.peg.2139	fig|53414.3.peg.2140	same strand	Alkyl hydroperoxide reductase protein F
Xanthomonas bromi	Xanthomonadaceae.32033	Xanthomonadales.135614	56449.3	1	fig|56449.3.peg.1854	fig|56449.3.peg.1855	same strand	Alkyl hydroperoxide reductase protein F
Xanthomonas cucurbitae	Xanthomonadaceae.32033	Xanthomonadales.135614	56453.4	1	fig|56453.4.peg.758	fig|56453.4.peg.759	same strand	Alkyl hydroperoxide reductase protein F
Xanthomonas melonis	Xanthomonadaceae.32033	Xanthomonadales.135614	56456.3	1	fig|56456.3.peg.407	fig|56456.3.peg.406	same strand	Alkyl hydroperoxide reductase protein F
Xanthomonas pisi	Xanthomonadaceae.32033	Xanthomonadales.135614	56457.3	1	fig|56457.3.peg.282	fig|56457.3.peg.281	same strand	Alkyl hydroperoxide reductase protein F
Xanthomonas sacchari	Xanthomonadaceae.32033	Xanthomonadales.135614	56458.2	1	fig|56458.17.peg.1594	fig|56458.17.peg.1593	same strand	Alkyl hydroperoxide reductase protein F
Xanthomonas vasicola	Xanthomonadaceae.32033	Xanthomonadales.135614	56459.2	1	fig|56459.20.peg.4140	fig|56459.20.peg.4139	same strand	Alkyl hydroperoxide reductase protein F
Xanthomonas vesicatoria	Xanthomonadaceae.32033	Xanthomonadales.135614	56460.1	1	fig|56460.12.peg.839	fig|56460.12.peg.840	same strand	Alkyl hydroperoxide reductase protein F
Xanthomonas codiaei	Xanthomonadaceae.32033	Xanthomonadales.135614	56463.3	1	fig|56463.3.peg.4564	fig|56463.3.peg.4565	same strand	Alkyl hydroperoxide reductase protein F
Xanthomonas theicola	Xanthomonadaceae.32033	Xanthomonadales.135614	56464.3	1	fig|56464.3.peg.2416	fig|56464.3.peg.2417	same strand	Alkyl hydroperoxide reductase protein F
Pseudoxanthomonas jiangsuensis	Xanthomonadaceae.32033	Xanthomonadales.135614	619688	1	fig|619688.3.peg.2930	fig|619688.3.peg.2929	same strand	Alkyl hydroperoxide reductase protein F
Luteimonas terricola	Xanthomonadaceae.32033	Xanthomonadales.135614	645597	1	fig|645597.3.peg.1016	fig|645597.3.peg.1015	same strand	Alkyl hydroperoxide reductase protein F
Stenotrophomonas daejeonensis	Xanthomonadaceae.32033	Xanthomonadales.135614	659018	1	fig|659018.3.peg.1615	fig|659018.3.peg.1614	same strand	Alkyl hydroperoxide reductase protein F
Stenotrophomonas panacihumi	Xanthomonadaceae.32033	Xanthomonadales.135614	676599	1	fig|676599.4.peg.1990	fig|676599.4.peg.1989	same strand	Alkyl hydroperoxide reductase protein F
Lysobacter ruishenii	Xanthomonadaceae.32033	Xanthomonadales.135614	686800	1	fig|686800.3.peg.37	fig|686800.3.peg.36	same strand	Alkyl hydroperoxide reductase protein F
Pseudoxanthomonas japonensis	Xanthomonadaceae.32033	Xanthomonadales.135614	69284.4	1	fig|69284.4.peg.1489	fig|69284.4.peg.1488	same strand	Alkyl hydroperoxide reductase protein F
Xanthomonas dyei	Xanthomonadaceae.32033	Xanthomonadales.135614	743699	1	fig|743699.3.peg.1432	fig|743699.3.peg.1433	same strand	Alkyl hydroperoxide reductase protein F
Stenotrophomonas nitritireducens	Xanthomonadaceae.32033	Xanthomonadales.135614	83617.6	1	fig|83617.6.peg.2867	fig|83617.6.peg.2868	same strand	Alkyl hydroperoxide reductase protein F
Pseudoxanthomonas broegbernensis	Xanthomonadaceae.32033	Xanthomonadales.135614	83619.3	1	fig|83619.3.peg.2743	fig|83619.3.peg.2742	same strand	Alkyl hydroperoxide reductase protein F
Xanthomonas hortorum	Xanthomonadaceae.32033	Xanthomonadales.135614	863365	1	fig|863365.4.peg.981	fig|863365.4.peg.982	same strand	Alkyl hydroperoxide reductase protein F
Xanthomonas gardneri	Xanthomonadaceae.32033	Xanthomonadales.135614	90270.2	1	fig|90270.23.peg.1657	fig|90270.23.peg.1658	same strand	Alkyl hydroperoxide reductase protein F
Lysobacter arseniciresistens	Xanthomonadaceae.32033	Xanthomonadales.135614	913325	1	fig|913325.4.peg.1419	fig|913325.4.peg.1420	same strand	Alkyl hydroperoxide reductase protein F
Xanthomonas phaseoli	Xanthomonadaceae.32033	Xanthomonadales.135614	92828.3	1	fig|92828.32.peg.924	fig|92828.32.peg.925	same strand	Alkyl hydroperoxide reductase protein F
Aestuariicella hydrocarbonica	Alteromonadales genera incertae sedis.256005	Alteromonadales.135622	1.47043e+06	2	fig|1470433.3.peg.1147	fig|1470433.3.peg.1146	same strand	Transcriptional repressor of ectoine biosynthetic genes	fig|1470433.3.peg.2441	fig|1470433.3.peg.2442	opposite strand	Nucleoside-diphosphate-sugar epimerases
Thalassomonas viridans	Colwelliaceae.267889	Alteromonadales.135622	137584	2	fig|137584.5.peg.2000	fig|137584.5.peg.1999	opposite strand	Alkyl hydroperoxide reductase protein C (EC 1.11.1.15)	fig|137584.5.peg.5263	fig|137584.5.peg.5262	opposite strand	hypothetical protein
Colwellia mytili	Colwelliaceae.267889	Alteromonadales.135622	1.88891e+06	2	fig|1888913.3.peg.2870	fig|1888913.3.peg.2869	same strand	Cytochrome c551 peroxidase (EC 1.11.1.5)	fig|1888913.3.peg.3315	fig|1888913.3.peg.3314	opposite strand	hypothetical protein
Colwellia polaris	Colwelliaceae.267889	Alteromonadales.135622	326537	2	fig|326537.3.peg.2822	fig|326537.3.peg.2825	same strand	Mannose-6-phosphate isomerase	fig|326537.3.peg.3526	fig|326537.3.peg.3527	opposite strand	Catalase-peroxidase KatG (EC 1.11.1.21)
Colwellia aestuarii	Colwelliaceae.267889	Alteromonadales.135622	329993	2	fig|329993.4.peg.1060	fig|329993.4.peg.1059	opposite strand	hypothetical protein	fig|329993.4.peg.1962	fig|329993.4.peg.1961	opposite strand	Catalase-peroxidase KatG (EC 1.11.1.21)
Thalassomonas actiniarum	Colwelliaceae.267889	Alteromonadales.135622	485448	2	fig|485447.8.peg.418	fig|485447.8.peg.417	opposite strand	hypothetical protein	fig|485447.8.peg.1062	fig|485447.8.peg.1063	opposite strand	Catalase-peroxidase KatG (EC 1.11.1.21)
Colwellia marinimaniae	Colwelliaceae.267889	Alteromonadales.135622	1.51359e+06	2	fig|1513592.3.peg.1803	fig|1513592.3.peg.1802	opposite strand	Catalase-peroxidase KatG (EC 1.11.1.21)	fig|1513592.3.peg.3283	fig|1513592.3.peg.3282	same strand	Transporter, LysE family
Colwellia psychrerythraea	Colwelliaceae.267889	Alteromonadales.135622	167880	2	fig|167879.5.peg.1209	fig|167879.5.peg.1207	opposite strand	Catalase-peroxidase KatG (EC 1.11.1.21)	fig|167879.5.peg.4304	fig|167879.5.peg.4305	same strand	Transporter, LysE family
Simiduia agarivorans	Cellvibrionaceae.1706371	Cellvibrionales.1706369	1.11765e+06	2	fig|1117647.4.peg.2567	fig|1117647.4.peg.2568	opposite strand	Nucleoside-diphosphate-sugar epimerases	fig|1117647.4.peg.3408	fig|1117647.4.peg.3407	opposite strand	Alkyl hydroperoxide reductase protein C (EC 1.11.1.15)
Pseudomaricurvus alkylphenolicus	Cellvibrionaceae.1706371	Cellvibrionales.1706369	1.30699e+06	2	fig|1306991.3.peg.4274	fig|1306991.3.peg.4275	opposite strand	Nucleoside-diphosphate-sugar epimerases	fig|1306991.3.peg.6062	fig|1306991.3.peg.6063	opposite strand	hypothetical protein
Cellvibrio mixtus	Cellvibrionaceae.1706371	Cellvibrionales.1706369	39650.4	2	fig|39650.3.peg.1728	fig|39650.4.peg.1728	opposite strand	hypothetical protein	fig|39650.3.peg.2522	fig|39650.3.peg.2521	opposite strand	Nucleoside-diphosphate-sugar epimerases
Haliea salexigens	Halieaceae.1706372	Cellvibrionales.1706369	1.12194e+06	2	fig|1121937.15.peg.212	fig|1121937.15.peg.213	opposite strand	Rubrerythrin	fig|1121937.15.peg.2239	fig|1121937.15.peg.2238	same strand	3-methylmercaptopropionyl-CoA dehydrogenase (DmdC)
Halioglobus japonicus	Halieaceae.1706372	Cellvibrionales.1706369	930806	2	fig|930805.9.peg.1509	fig|930805.9.peg.1511	opposite strand	Catalase-peroxidase KatG (EC 1.11.1.21)	fig|930805.9.peg.2455	fig|930805.9.peg.2456	same strand	RidA/YER057c/UK114 superfamily protein
Spongiibacter tropicus	Spongiibacteraceae.1706375	Cellvibrionales.1706369	1.12328e+06	2	fig|1123279.7.peg.1671	fig|1123279.7.peg.1670	opposite strand	Alkyl hydroperoxide reductase protein C (EC 1.11.1.15)	fig|1123279.7.peg.1987	fig|1123279.7.peg.1988	same strand	Quinone oxidoreductase (EC 1.6.5.5)
Zhongshania aliphaticivorans	Spongiibacteraceae.1706375	Cellvibrionales.1706369	1.47043e+06	2	fig|1470434.8.peg.1153	fig|1470434.8.peg.1152	opposite strand	Alkyl hydroperoxide reductase protein C (EC 1.11.1.15)	fig|1470434.8.peg.2008	fig|1470434.8.peg.2007	same strand	Quinone oxidoreductase (EC 1.6.5.5)
Thiocapsa roseopersicina	Chromatiaceae.1046	Chromatiales.135613	1058.1	2	fig|1058.10.peg.3408	fig|1058.10.peg.3407	same strand	hypothetical protein	fig|1058.10.peg.3817	fig|1058.10.peg.3816	opposite strand	Chaperone protein ClpB (ATP-dependent unfoldase)
Thiodiazotropha endoloripes	Sedimenticolaceae.3067276	Chromatiales.135613	1.81888e+06	2	fig|1818881.24.peg.298	fig|1818881.24.peg.299	opposite strand	3',5'-cyclic-nucleotide phosphodiesterase (EC 3.1.4.17)	fig|1818881.24.peg.2058	fig|1818881.24.peg.2057	opposite strand	hypothetical protein
Lonsdalea quercina	Pectobacteriaceae.1903410	Enterobacterales.91347	71657.5	2	fig|71657.5.peg.2920	fig|71657.5.peg.2917	same strand	hypothetical protein	fig|71657.5.peg.3054	fig|71657.5.peg.3053	same strand	5,10-methylenetetrahydrofolate reductase (EC 1.5.1.20)
Sedimenticola selenatireducens		Gammaproteobacteria incertae sedis.118884	1.11174e+06	2	fig|1111735.3.peg.739	fig|1111735.3.peg.741	same strand	related to glutamate dehydrogenase	fig|1111735.3.peg.4322	fig|1111735.3.peg.4321	opposite strand	Rubrerythrin
Pseudohongiella nitratireducens		Gammaproteobacteria incertae sedis.118884	1.76891e+06	2	fig|1768907.5.peg.634	fig|1768907.5.peg.632	same strand	ATP-dependent Clp protease proteolytic subunit ClpP (EC 3.4.21.92)	fig|1768907.5.peg.1318	fig|1768907.5.peg.1319	opposite strand	Selenide,water dikinase (EC 2.7.9.3)
Solemya velum		Gammaproteobacteria incertae sedis.118884	2340.58	2	fig|2340.58.peg.631	fig|2340.58.peg.633	same strand	tRNA t(6)A37-methylthiotransferase (EC 2.8.4.5)	fig|2340.58.peg.2219	fig|2340.58.peg.2218	same strand	Acylphosphate phosphohydrolase (EC 3.6.1.7)
Kangiella sediminilitoris	Kangiellaceae.1920240	Oceanospirillales.135619	1.14475e+06	2	fig|1144748.3.peg.188	fig|1144748.3.peg.189	same strand	hypothetical protein	fig|1144748.3.peg.320	fig|1144748.3.peg.319	opposite strand	Alkyl hydroperoxide reductase protein C (EC 1.11.1.15)
Aliikangiella marina	Kangiellaceae.1920240	Oceanospirillales.135619	1.71226e+06	2	fig|1712262.3.peg.2903	fig|1712262.3.peg.2906	opposite strand	TonB-dependent receptor	fig|1712262.3.peg.3539	fig|1712262.3.peg.3538	opposite strand	Alkyl hydroperoxide reductase protein C (EC 1.11.1.15)
Kangiella geojedonensis	Kangiellaceae.1920240	Oceanospirillales.135619	914150	2	fig|914150.17.peg.155	fig|914150.17.peg.156	same strand	Tellurite resistance protein TehB	fig|914150.17.peg.303	fig|914150.17.peg.302	opposite strand	Alkyl hydroperoxide reductase protein C (EC 1.11.1.15)
Kangiella aquimarina	Kangiellaceae.1920240	Oceanospirillales.135619	1.12213e+06	2	fig|1122134.4.peg.269	fig|1122134.4.peg.270	opposite strand	Alkyl hydroperoxide reductase protein C (EC 1.11.1.15)	fig|1122134.4.peg.551	fig|1122134.4.peg.552	same strand	Tellurite methyltransferase (EC 2.1.1.265)
Kangiella profundi	Kangiellaceae.1920240	Oceanospirillales.135619	1.56192e+06	2	fig|1561924.3.peg.95	fig|1561924.3.peg.94	opposite strand	Alkyl hydroperoxide reductase protein C (EC 1.11.1.15)	fig|1561924.3.peg.2281	fig|1561924.3.peg.2280	same strand	Tellurite methyltransferase (EC 2.1.1.265)
Kangiella koreensis	Kangiellaceae.1920240	Oceanospirillales.135619	523792	2	fig|523791.5.peg.133	fig|523791.5.peg.132	opposite strand	Alkyl hydroperoxide reductase protein C (EC 1.11.1.15)	fig|523791.5.peg.2385	fig|523791.5.peg.2386	same strand	Tellurite methyltransferase (EC 2.1.1.265)
Kangiella spongicola	Kangiellaceae.1920240	Oceanospirillales.135619	796379	2	fig|796379.3.peg.599	fig|796379.3.peg.600	opposite strand	Alkyl hydroperoxide reductase protein C (EC 1.11.1.15)	fig|796379.3.peg.746	fig|796379.3.peg.745	same strand	hypothetical protein
Marinobacterium rhizophilum	Oceanospirillaceae.135620	Oceanospirillales.135619	1.1222e+06	2	fig|1122202.3.peg.1932	fig|1122202.3.peg.1933	opposite strand	Rubrerythrin	fig|1122202.3.peg.4634	fig|1122202.3.peg.4635	opposite strand	Nucleoside-diphosphate-sugar epimerases
Neptunomonas japonica	Oceanospirillaceae.135620	Oceanospirillales.135619	1.1226e+06	2	fig|1122599.8.peg.797	fig|1122599.8.peg.796	opposite strand	Nucleoside-diphosphate-sugar epimerases	fig|1122599.8.peg.1912	fig|1122599.8.peg.1913	opposite strand	Na(+) H(+) antiporter subunit E
Amphritea japonica	Oceanospirillaceae.135620	Oceanospirillales.135619	1.27831e+06	2	fig|1278309.3.peg.1942	fig|1278309.3.peg.1943	opposite strand	Na(+) H(+) antiporter subunit E	fig|1278309.3.peg.2478	fig|1278309.3.peg.2479	opposite strand	Nucleoside-diphosphate-sugar epimerases
Motiliproteus coralliicola	Oceanospirillaceae.135620	Oceanospirillales.135619	2.2832e+06	2	fig|2283196.3.peg.2463	fig|2283196.3.peg.2462	opposite strand	hypothetical protein	fig|2283196.3.peg.3235	fig|2283196.3.peg.3236	opposite strand	Nucleoside-diphosphate-sugar epimerases
Amphritea atlantica	Oceanospirillaceae.135620	Oceanospirillales.135619	355244	2	fig|355243.5.peg.3253	fig|355243.5.peg.3252	opposite strand	Nucleoside-diphosphate-sugar epimerases	fig|355243.5.peg.3274	fig|355243.5.peg.3275	opposite strand	Alkyl hydroperoxide reductase protein C (EC 1.11.1.15)
Amphritea balenae	Oceanospirillaceae.135620	Oceanospirillales.135619	452629	2	fig|452629.3.peg.2342	fig|452629.3.peg.2343	opposite strand	Na(+) H(+) antiporter subunit E	fig|452629.3.peg.3570	fig|452629.3.peg.3569	opposite strand	Nucleoside-diphosphate-sugar epimerases
Marinomonas mediterranea	Oceanospirillaceae.135620	Oceanospirillales.135619	717774	2	fig|717774.3.peg.222	fig|717774.3.peg.223	same strand	Cytoplasmic beta-glucosidase (EC 3.2.1.21)	fig|717774.3.peg.4275	fig|717774.3.peg.4274	opposite strand	Nucleoside-diphosphate-sugar epimerases
Oceanospirillum beijerinckii	Oceanospirillaceae.135620	Oceanospirillales.135619	1.12262e+06	2	fig|1122616.3.peg.515	fig|1122616.3.peg.516	opposite strand	Thioredoxin	fig|1122616.3.peg.2930	fig|1122616.3.peg.2931	same strand	hypothetical protein
Pseudomonas zeshuii	Pseudomonadaceae.135621	Pseudomonadales.72274	1.07662e+06	2	fig|1076620.3.peg.466	fig|1076620.3.peg.467	opposite strand	Nucleoside-diphosphate-sugar epimerases	fig|1076620.3.peg.2549	fig|1076620.3.peg.2547	opposite strand	Chromosome (plasmid) partitioning protein ParA
Pseudomonas luteola	Pseudomonadaceae.135621	Pseudomonadales.72274	1.21511e+06	2	fig|1215106.3.peg.211	fig|1215106.3.peg.212	opposite strand	Nucleoside-diphosphate-sugar epimerases	fig|1215106.3.peg.4723	fig|1215106.3.peg.4725	opposite strand	Chromosome (plasmid) partitioning protein ParA
Pseudomonas alcaligenes	Pseudomonadaceae.135621	Pseudomonadales.72274	1.4058e+06	2	fig|1405803.3.peg.649	fig|1405803.3.peg.650	same strand	putative TonB-dependent receptor	fig|1405803.3.peg.3682	fig|1405803.3.peg.3683	opposite strand	Catalase KatE (EC 1.11.1.6)
Pseudomonas otitidis	Pseudomonadaceae.135621	Pseudomonadales.72274	319939	2	fig|319939.24.peg.795	fig|319939.24.peg.794	opposite strand	Catalase KatE (EC 1.11.1.6)	fig|319939.24.peg.2450	fig|319939.24.peg.2449	same strand	putative TonB-dependent receptor
Pseudomonas baetica	Pseudomonadaceae.135621	Pseudomonadales.72274	674054	2	fig|674054.5.peg.941	fig|674054.5.peg.943	same strand	Transposase and inactivated derivatives, IS30 family	fig|674054.5.peg.3344	fig|674054.5.peg.3346	same strand	putative TonB-dependent receptor
Methylophaga sulfidovorans	Piscirickettsiaceae.135616	Thiotrichales.72273	45496.5	2	fig|45496.5.peg.742	fig|45496.5.peg.741	opposite strand	hypothetical protein	fig|45496.5.peg.839	fig|45496.5.peg.840	opposite strand	Rubredoxin
Methylophaga thiooxydans	Piscirickettsiaceae.135616	Thiotrichales.72273	637616	2	fig|637616.3.peg.1593	fig|637616.3.peg.1592	opposite strand	Rubredoxin	fig|637616.3.peg.1686	fig|637616.3.peg.1687	opposite strand	Protein PhnA
Leucothrix pacifica	Thiotrichaceae.135617	Thiotrichales.72273	1.24751e+06	2	fig|1247513.4.peg.3968	fig|1247513.4.peg.3967	opposite strand	Alkyl hydroperoxide reductase protein C (EC 1.11.1.15)	fig|1247513.4.peg.4448	fig|1247513.4.peg.4447	opposite strand	Glutathione reductase (EC 1.8.1.7)
Enterovibrio pacificus	Vibrionaceae.641	Vibrionales.135623	1.08023e+06	2	fig|1080227.5.peg.2920	fig|1080227.5.peg.2921	opposite strand	Hybrid peroxiredoxin hyPrx5 (EC 1.11.1.15)	fig|1080227.5.peg.4776	fig|1080227.5.peg.4775	opposite strand	2-methylcitrate dehydratase (EC 4.2.1.79)
Vibrio nigripulchritudo	Vibrionaceae.641	Vibrionales.135623	1.23845e+06	2	fig|1238445.3.peg.1946	fig|1238445.3.peg.1947	opposite strand	2-methylcitrate dehydratase (EC 4.2.1.79)	fig|1238445.3.peg.2568	fig|1238445.3.peg.2567	opposite strand	Hybrid peroxiredoxin hyPrx5 (EC 1.11.1.15)
Photobacterium rosenbergii	Vibrionaceae.641	Vibrionales.135623	294936	2	fig|294936.4.peg.2856	fig|294936.4.peg.2854	same strand	Membrane protein	fig|294936.4.peg.5414	fig|294936.4.peg.5413	opposite strand	Hybrid peroxiredoxin hyPrx5 (EC 1.11.1.15)
Photobacterium lutimaris	Vibrionaceae.641	Vibrionales.135623	388278	2	fig|388278.3.peg.2964	fig|388278.3.peg.2966	same strand	Membrane protein	fig|388278.3.peg.5087	fig|388278.3.peg.5086	opposite strand	Hybrid peroxiredoxin hyPrx5 (EC 1.11.1.15)
Vibrio hangzhouensis	Vibrionaceae.641	Vibrionales.135623	462992	2	fig|462991.9.peg.2581	fig|462991.9.peg.2580	same strand	hypothetical protein	fig|462991.9.peg.3739	fig|462991.9.peg.3740	opposite strand	Hybrid peroxiredoxin hyPrx5 (EC 1.11.1.15)
Photobacterium aphoticum	Vibrionaceae.641	Vibrionales.135623	754436	2	fig|754436.4.peg.1181	fig|754436.4.peg.1182	same strand	hypothetical protein	fig|754436.4.peg.3434	fig|754436.4.peg.3435	opposite strand	Hybrid peroxiredoxin hyPrx5 (EC 1.11.1.15)
Vibrio caribbenthicus	Vibrionaceae.641	Vibrionales.135623	796620	2	fig|796620.3.peg.1099	fig|796620.3.peg.1100	same strand	hypothetical protein	fig|796620.3.peg.1581	fig|796620.3.peg.1580	opposite strand	Hybrid peroxiredoxin hyPrx5 (EC 1.11.1.15)
Vibrio proteolyticus	Vibrionaceae.641	Vibrionales.135623	1.21907e+06	2	fig|1219065.4.peg.1334	fig|1219065.4.peg.1335	opposite strand	Hybrid peroxiredoxin hyPrx5 (EC 1.11.1.15)	fig|1219065.4.peg.1900	fig|1219065.4.peg.1901	same strand	hypothetical protein
Vibrio parahaemolyticus	Vibrionaceae.641	Vibrionales.135623	223927	2	fig|223926.6.peg.2649	fig|223926.6.peg.2650	opposite strand	Hybrid peroxiredoxin hyPrx5 (EC 1.11.1.15)	fig|223926.6.peg.3396	fig|223926.6.peg.3397	same strand	hypothetical protein
Vibrio variabilis	Vibrionaceae.641	Vibrionales.135623	990271	2	fig|990271.12.peg.1036	fig|990271.12.peg.1035	opposite strand	Hybrid peroxiredoxin hyPrx5 (EC 1.11.1.15)	fig|990271.12.peg.2616	fig|990271.12.peg.2614	same strand	hypothetical protein
Rhodanobacter spathiphylli	Rhodanobacteraceae.1775411	Xanthomonadales.135614	1.16341e+06	2	fig|1163407.3.peg.2319	fig|1163407.3.peg.2320	opposite strand	Membrane alanine aminopeptidase N (EC 3.4.11.2)	fig|1163407.3.peg.2651	fig|1163407.3.peg.2652	opposite strand	Aconitate hydratase (EC 4.2.1.3)
Rhodanobacter fulvus	Rhodanobacteraceae.1775411	Xanthomonadales.135614	1.16341e+06	2	fig|1163408.3.peg.520	fig|1163408.3.peg.519	opposite strand	Membrane alanine aminopeptidase N (EC 3.4.11.2)	fig|1163408.3.peg.2283	fig|1163408.3.peg.2282	opposite strand	Aconitate hydratase (EC 4.2.1.3)
Dyella ginsengisoli	Rhodanobacteraceae.1775411	Xanthomonadales.135614	1.23436e+06	2	fig|1234364.3.peg.3065	fig|1234364.3.peg.3066	same strand	Aconitate hydratase 2 (EC 4.2.1.3)	fig|1234364.3.peg.3899	fig|1234364.3.peg.3897	opposite strand	Membrane alanine aminopeptidase N (EC 3.4.11.2)
Fulvimonas soli	Rhodanobacteraceae.1775411	Xanthomonadales.135614	155197	2	fig|155197.3.peg.1408	fig|155197.3.peg.1410	opposite strand	Aconitate hydratase (EC 4.2.1.3)	fig|155197.3.peg.1569	fig|155197.3.peg.1570	opposite strand	Membrane alanine aminopeptidase N (EC 3.4.11.2)
Oleiagrimonas citrea	Rhodanobacteraceae.1775411	Xanthomonadales.135614	1.66569e+06	2	fig|1665687.3.peg.1991	fig|1665687.3.peg.1990	opposite strand	Aconitate hydratase (EC 4.2.1.3)	fig|1665687.3.peg.2388	fig|1665687.3.peg.2389	opposite strand	Alkyl hydroperoxide reductase protein C (EC 1.11.1.15)
Luteibacter yeojuensis	Rhodanobacteraceae.1775411	Xanthomonadales.135614	345309	2	fig|345309.27.peg.174	fig|345309.27.peg.173	opposite strand	Aconitate hydratase (EC 4.2.1.3)	fig|345309.27.peg.3375	fig|345309.27.peg.3374	opposite strand	Alkyl hydroperoxide reductase protein C (EC 1.11.1.15)
Rhodanobacter thiooxydans	Rhodanobacteraceae.1775411	Xanthomonadales.135614	416169	2	fig|416169.3.peg.246	fig|416169.3.peg.245	opposite strand	Aconitate hydratase (EC 4.2.1.3)	fig|416169.3.peg.3289	fig|416169.3.peg.3288	opposite strand	Membrane alanine aminopeptidase N (EC 3.4.11.2)
Dyella thiooxydans	Rhodanobacteraceae.1775411	Xanthomonadales.135614	445710	2	fig|445710.3.peg.646	fig|445710.3.peg.645	same strand	Aconitate hydratase 2 (EC 4.2.1.3)	fig|445710.3.peg.3773	fig|445710.3.peg.3774	opposite strand	Membrane alanine aminopeptidase N (EC 3.4.11.2)
Dyella marensis	Rhodanobacteraceae.1775411	Xanthomonadales.135614	500610	2	fig|500610.3.peg.2248	fig|500610.3.peg.2249	same strand	Aconitate hydratase 2 (EC 4.2.1.3)	fig|500610.3.peg.3688	fig|500610.3.peg.3686	opposite strand	Membrane alanine aminopeptidase N (EC 3.4.11.2)
Dyella terrae	Rhodanobacteraceae.1775411	Xanthomonadales.135614	522259	2	fig|522259.3.peg.1015	fig|522259.3.peg.1016	same strand	Aconitate hydratase 2 (EC 4.2.1.3)	fig|522259.3.peg.2929	fig|522259.3.peg.2930	opposite strand	Membrane alanine aminopeptidase N (EC 3.4.11.2)
Frateuria terrea	Rhodanobacteraceae.1775411	Xanthomonadales.135614	529704	2	fig|529704.4.peg.81	fig|529704.4.peg.82	opposite strand	Aconitate hydratase (EC 4.2.1.3)	fig|529704.4.peg.961	fig|529704.4.peg.960	opposite strand	Alkyl hydroperoxide reductase protein C (EC 1.11.1.15)
Luteibacter anthropi	Rhodanobacteraceae.1775411	Xanthomonadales.135614	564369	2	fig|564369.3.peg.2622	fig|564369.3.peg.2623	opposite strand	Aconitate hydratase (EC 4.2.1.3)	fig|564369.3.peg.2854	fig|564369.3.peg.2856	opposite strand	Alkyl hydroperoxide reductase protein C (EC 1.11.1.15)
Dokdonella immobilis	Rhodanobacteraceae.1775411	Xanthomonadales.135614	578942	2	fig|578942.3.peg.259	fig|578942.3.peg.258	opposite strand	Alkyl hydroperoxide reductase protein C (EC 1.11.1.15)	fig|578942.3.peg.1517	fig|578942.3.peg.1516	opposite strand	MBL-fold metallo-hydrolase superfamily
Rhodanobacter glycinis	Rhodanobacteraceae.1775411	Xanthomonadales.135614	582702	2	fig|582702.3.peg.626	fig|582702.3.peg.627	opposite strand	Membrane alanine aminopeptidase N (EC 3.4.11.2)	fig|582702.3.peg.1896	fig|582702.3.peg.1894	opposite strand	Aconitate hydratase (EC 4.2.1.3)
Luteibacter jiangsuensis	Rhodanobacteraceae.1775411	Xanthomonadales.135614	637577	2	fig|637577.3.peg.241	fig|637577.3.peg.240	opposite strand	Aconitate hydratase (EC 4.2.1.3)	fig|637577.3.peg.2838	fig|637577.3.peg.2837	opposite strand	Alkyl hydroperoxide reductase protein C (EC 1.11.1.15)
Rhodanobacter denitrificans	Rhodanobacteraceae.1775411	Xanthomonadales.135614	666686	2	fig|666685.9.peg.183	fig|666685.9.peg.181	opposite strand	Membrane alanine aminopeptidase N (EC 3.4.11.2)	fig|666685.9.peg.1465	fig|666685.9.peg.1466	opposite strand	Aconitate hydratase (EC 4.2.1.3)
Rhodanobacter lindaniclasticus	Rhodanobacteraceae.1775411	Xanthomonadales.135614	75310.3	2	fig|75310.3.peg.3397	fig|75310.3.peg.3396	opposite strand	Aconitate hydratase (EC 4.2.1.3)	fig|75310.3.peg.3736	fig|75310.3.peg.3735	opposite strand	Membrane alanine aminopeptidase N (EC 3.4.11.2)
Frateuria aurantia	Rhodanobacteraceae.1775411	Xanthomonadales.135614	767434	2	fig|767434.3.peg.2449	fig|767434.3.peg.2448	opposite strand	Peptide chain release factor N(5)-glutamine methyltransferase (EC 2.1.1.297)	fig|767434.3.peg.2449	fig|767434.3.peg.2448	opposite strand	Peptide chain release factor N(5)-glutamine methyltransferase (EC 2.1.1.297)
Metallibacterium scheffleri	Rhodanobacteraceae.1775411	Xanthomonadales.135614	993689	2	fig|993689.15.peg.2538	fig|993689.15.peg.2539	opposite strand	Aconitate hydratase (EC 4.2.1.3)	fig|993689.15.peg.3305	fig|993689.15.peg.3304	opposite strand	Peptide chain release factor N(5)-glutamine methyltransferase (EC 2.1.1.297)
Dyella jiangningensis	Rhodanobacteraceae.1775411	Xanthomonadales.135614	1.37916e+06	2	fig|1379159.6.peg.857	fig|1379159.6.peg.858	same strand	Serine protease	fig|1379159.6.peg.2546	fig|1379159.6.peg.2547	same strand	Aconitate hydratase 2 (EC 4.2.1.3)
Pseudoxanthomonas kalamensis	Xanthomonadaceae.32033	Xanthomonadales.135614	1.12303e+06	2	fig|1123030.3.peg.1263	fig|1123030.3.peg.1264	opposite strand	MBL-fold metallo-hydrolase superfamily	fig|1123030.3.peg.2613	fig|1123030.3.peg.2612	same strand	Alkyl hydroperoxide reductase protein F
Thermomonas haemolytica	Xanthomonadaceae.32033	Xanthomonadales.135614	141950	2	fig|141949.5.peg.1206	fig|141949.5.peg.1207	opposite strand	MBL-fold metallo-hydrolase superfamily	fig|141949.5.peg.1560	fig|141949.5.peg.1561	same strand	Lactoylglutathione lyase
Lysobacter silvestris	Xanthomonadaceae.32033	Xanthomonadales.135614	1.64567e+06	2	fig|1645665.3.peg.1125	fig|1645665.3.peg.1126	opposite strand	Molybdopterin synthase catalytic subunit MoaE (EC 2.8.1.12)	fig|1645665.3.peg.1740	fig|1645665.3.peg.1742	same strand	Alkyl hydroperoxide reductase protein F
Xanthomonas perforans	Xanthomonadaceae.32033	Xanthomonadales.135614	442695	2	fig|442694.6.peg.3801	fig|442694.6.peg.3802	same strand	Alkyl hydroperoxide reductase protein F	fig|442694.6.peg.5088	fig|442694.6.peg.5089	same strand	Alkyl hydroperoxide reductase protein F
Colwellia demingiae	Colwelliaceae.267889	Alteromonadales.135622	89401.3	3	fig|89401.3.peg.1732	fig|89401.3.peg.1731	opposite strand	Alkyl hydroperoxide reductase protein C (EC 1.11.1.15)	fig|89401.3.peg.1944	fig|89401.3.peg.1945	same strand	Transporter, LysE family	fig|89401.3.peg.2541	fig|89401.3.peg.2542	opposite strand	Catalase-peroxidase KatG (EC 1.11.1.21)
Pseudomonas duriflava	Pseudomonadaceae.135621	Pseudomonadales.72274	459528	3	fig|459528.3.peg.822	fig|459528.3.peg.823	opposite strand	Nucleoside-diphosphate-sugar epimerases	fig|459528.3.peg.1190	fig|459528.3.peg.1189	same strand	Methionine aminopeptidase (EC 3.4.11.18)	fig|459528.3.peg.3455	fig|459528.3.peg.3456	same strand	Manganese transport protein MntH
Luteibacter rhizovicinus	Rhodanobacteraceae.1775411	Xanthomonadales.135614	1.44076e+06	3	fig|1440763.5.peg.3042	fig|1440763.5.peg.3043	opposite strand	Aconitate hydratase (EC 4.2.1.3)	fig|1440763.5.peg.3487	fig|1440763.5.peg.3486	same strand	Ferrochelatase, protoheme ferro-lyase (EC 4.99.1.1)	fig|1440763.5.peg.3562	fig|1440763.5.peg.3563	opposite strand	Alkyl hydroperoxide reductase protein C (EC 1.11.1.15)

## Sheet: S2 oxyS neighbors
NCBI accession	Taxa	oxyS location	oxyS strand	oxyR location	oxyR strand
NZ_CP009451.1	Cedecea neteri	2510138..2510251	+	2509117..2510034	-
NZ_CP009458.1	Cedecea neteri	1233356..1233469	-	1233573..1234490	+
NZ_CP009459.1	Cedecea neteri	1216302..1216415	-	1216519..1217436	+
NC_009792.1	Citrobacter koseri ATCC BAA-895	2809329..2809437	+	2808314..2809231	-
NC_013716.1	Citrobacter rodentium ICC168	3985194..3985299	+	3984180..3985097	-
NZ_CP007557.1	Citrobacter freundii CFNIH1	1522513..1522621	-	1522719..1523636	+
NZ_CP011132.1	Citrobacter amalonaticus Y19	4715791..4715897	-	4715995..4716912	+
NZ_CP011612.1	Citrobacter freundii	3406663..3406771	-	3406869..3407786	+
NZ_CP011657.1	Citrobacter freundii	2650784..2650892	+	2649769..2650686	-
NZ_CP012554.1	Citrobacter portucalensis	3060646..3060753	-	3060851..3061768	+
NZ_CP014015.1	Citrobacter amalonaticus	1576245..1576351	+	1575230..1576147	-
NZ_CP014070.1	Citrobacter amalonaticus	912522..912626	-	912724..913641	+
NZ_CP016762.1	Citrobacter freundii	4878701..4878809	+	4877686..4878603	-
NZ_CP016952.1	Citrobacter freundii	799398..799506	+	798383..799300	-
NZ_CP019986.1	Citrobacter werkmanii	3494572..3494680	+	3493557..3494474	-
NZ_CP020448.1	Citrobacter braakii	3267709..3267817	+	3266694..3267611	-
NZ_CP022049.1	Citrobacter braakii	2970868..2970976	-	2971074..2971991	+
NZ_CP022151.1	Citrobacter freundii	4949740..4949848	+	4948725..4949642	-
NZ_CP022273.1	Citrobacter freundii	2900133..2900241	+	2899118..2900035	-
NC_009778.1	Cronobacter sakazakii ATCC BAA-894	3752117..3752228	+	3751103..3752020	-
NC_013282.2	Cronobacter turicensis z3032	207827..207938	-	208035..208952	+
NC_017933.1	Cronobacter sakazakii ES15	4058854..4058965	+	4057840..4058757	-
NC_020260.1	Cronobacter sakazakii SP291	3756751..3756862	+	3755737..3756654	-
NZ_CP011047.1	Cronobacter sakazakii	803375..803486	+	802361..803278	-
NZ_CP012253.1	Cronobacter sakazakii	3741970..3742081	+	3740956..3741873	-
NZ_CP012257.1	Cronobacter universalis NCTC 9529	171100..171211	-	171308..172225	+
NZ_CP012264.1	Cronobacter condimenti 1330	241902..242015	-	242112..243029	+
NZ_CP012266.1	Cronobacter dublinensis subsp. dublinensis LMG 23823	235948..236059	-	236156..237073	+
NZ_CP012268.1	Cronobacter muytjensii ATCC 51329	3808332..3808443	+	3807318..3808235	-
NZ_CP013940.1	Cronobacter malonaticus LMG 23826	3931406..3931517	+	3930392..3931309	-
NC_014121.1	Enterobacter cloacae subsp. cloacae ATCC 13047	5162464..5162573	+	5161449..5162366	-
NC_015663.1	Klebsiella aerogenes KCTC 2190	1596285..1596378	-	1596477..1597394	+
NC_015968.1	Enterobacter soli	4633870..4633981	+	4632846..4633772	-
NC_016514.1	Enterobacter ludwigii	4588119..4588228	+	4587104..4588021	-
NC_018079.1	Enterobacter cloacae subsp. dissolvens SDM	4825656..4825765	+	4824641..4825558	-
NC_018405.1	Enterobacter kobei	4606592..4606701	+	4605577..4606494	-
NC_020181.1	Klebsiella aerogenes EA1509E	3822533..3822626	+	3821517..3822434	-
NZ_CP006580.1	Enterobacter ludwigii	209851..209960	-	210058..210975	+
NZ_CP007546.1	Enterobacter asburiae L1	4047238..4047347	-	4047445..4048362	+
NZ_CP008823.1	Enterobacter cloacae ECNIH2	4739250..4739359	+	4738235..4739152	-
NZ_CP009756.1	Enterobacter cloacae	4695409..4695518	+	4694394..4695311	-
NZ_CP009850.1	Enterobacter cloacae	4646071..4646180	+	4645056..4645973	-
NZ_CP009854.1	Enterobacter cloacae	4516012..4516121	+	4514997..4515914	-
NZ_CP010376.2	Enterobacter hormaechei subsp. steigerwaltii	4728096..4728205	+	4727081..4727998	-
NZ_CP010377.1	Enterobacter hormaechei subsp. hormaechei	4473355..4473464	+	4472340..4473257	-
NZ_CP010384.1	Enterobacter hormaechei subsp. xiangfangensis	4627035..4627144	+	4626020..4626937	-
NZ_CP011572.1	Enterobacter hormaechei	2945619..2945728	-	2945826..2946743	+
NZ_CP011581.1	Enterobacter hormaechei	1059334..1059443	-	1059541..1060458	+
NZ_CP011584.1	Enterobacter hormaechei	3871915..3872024	+	3870900..3871817	-
NZ_CP011591.1	Enterobacter asburiae	3223355..3223463	-	3223562..3224479	+
NZ_CP011650.1	Enterobacter hormaechei	3844444..3844553	+	3843429..3844346	-
NZ_CP011798.1	Enterobacter ludwigii	309014..309123	+	307999..308916	-
NZ_CP011863.1	Enterobacter asburiae	3676484..3676593	-	3676691..3677608	+
NZ_CP012165.1	Enterobacter hormaechei subsp. xiangfangensis	4770998..4771107	+	4769983..4770900	-
NZ_CP012167.1	Enterobacter hormaechei subsp. steigerwaltii	4531262..4531371	+	4530247..4531164	-
NZ_CP017179.1	Enterobacter hormaechei subsp. steigerwaltii	4620349..4620458	+	4619334..4620251	-
NZ_CP017180.1	Enterobacter hormaechei subsp. oharae	4557819..4557928	+	4556804..4557721	-
NZ_CP017181.1	Enterobacter kobei	4714087..4714196	+	4713072..4713989	-
NZ_CP017183.1	Enterobacter hormaechei subsp. xiangfangensis	4495433..4495542	+	4494418..4495335	-
NZ_CP017279.1	Enterobacter ludwigii	3087719..3087828	+	3086704..3087621	-
NZ_CP018785.1	Enterobacter ludwigii	3128279..3128388	-	3128486..3129403	+
NZ_CP018814.1	Enterobacter cloacae complex sp. AR_0002	3813340..3813449	-	3813547..3814464	+
NZ_CP019839.1	Enterobacter roggenkampii	148507..148617	-	148715..149632	+
NZ_CP020053.1	Enterobacter cloacae complex sp.	2640568..2640677	-	2640775..2641692	+
NZ_CP021749.1	Enterobacter cloacae complex sp.	2661686..2661795	-	2661893..2662810	+
NZ_CP021776.1	Enterobacter cloacae complex sp.	3218511..3218620	+	3217496..3218413	-
NZ_CP021851.1	Enterobacter cloacae	4953854..4953962	+	4952838..4953755	-
NZ_CP021896.1	Enterobacter cloacae complex sp.	705187..705296	+	704172..705089	-
NZ_CP021902.1	Enterobacter cloacae complex sp.	2981582..2981691	+	2980567..2981484	-
NZ_CP022148.1	Enterobacter roggenkampii	3677379..3677489	-	3677587..3678504	+
NZ_CP022532.1	Enterobacter hormaechei	1954041..1954150	-	1954248..1955165	+
NC_000913.3	Escherichia coli str. K-12 substr. MG1655	4158285..4158392	-	4158490..4159407	+
NC_002695.1	Escherichia coli O157:H7 str. Sakai	4964922..4965029	-	4965127..4966044	+
NC_004431.1	Escherichia coli CFT073	4688061..4688168	-	4688266..4689183	+
NC_007779.1	Escherichia coli str. K-12 substr. W3110	3478289..3478396	+	3477274..3478191	-
NC_007946.1	Escherichia coli UTI89	4445365..4445472	-	4445570..4446487	+
NC_008253.1	Escherichia coli 536	4367771..4367878	-	4367976..4368893	+
NC_008563.1	Escherichia coli APEC O1	4477379..4477486	-	4477584..4478501	+
NC_009800.1	Escherichia coli HS	4187951..4188058	-	4188156..4189073	+
NC_009801.1	Escherichia coli O139:H28 str. E24377A	4495397..4495504	-	4495602..4496519	+
NC_010468.1	Escherichia coli ATCC 8739	4473682..4473789	+	4472667..4473584	-
NC_010473.1	Escherichia coli str. K-12 substr. DH10B	4256005..4256112	-	4256210..4257127	+
NC_010498.1	Escherichia coli SMS-3-5	4504108..4504215	-	4504313..4505230	+
NC_011353.1	Escherichia coli O157:H7 str. EC4115	5068035..5068142	-	5068240..5069157	+
NC_011415.1	Escherichia coli SE11	4427850..4427957	-	4428055..4428972	+
NC_011601.1	Escherichia coli O127:H6 str. E2348/69	4486260..4486367	-	4486465..4487382	+
NC_011740.1	Escherichia fergusonii ATCC 35469	3892268..3892375	+	3891253..3892170	-
NC_011741.1	Escherichia coli IAI1	4247516..4247623	-	4247721..4248638	+
NC_011742.1	Escherichia coli S88	4392029..4392136	-	4392234..4393151	+
NC_011748.1	Escherichia coli 55989	4548230..4548337	-	4548435..4549352	+
NC_011750.1	Escherichia coli IAI39	3147564..3147671	+	3146549..3147466	-
NC_011993.1	Escherichia coli LF82	4232968..4233075	-	4233173..4234090	+
NC_012759.1	Escherichia coli BW2952	4045977..4046084	-	4046182..4047099	+
NC_012892.2	Escherichia coli BL21(DE3)	4066580..4066687	-	4066785..4067702	+
NC_012947.1	Escherichia coli 'BL21-Gold(DE3)pLysS AG'	4275779..4275886	+	4274764..4275681	-
NC_012967.1	Escherichia coli B str. REL606	4138146..4138253	-	4138351..4139268	+
NC_012971.2	Escherichia coli BL21(DE3)	4066586..4066693	-	4066791..4067708	+
NC_013008.1	Escherichia coli O157:H7 str. TW14359	5024095..5024202	-	5024300..5025217	+
NC_013353.1	Escherichia coli O103:H2 str. 12009	4868838..4868945	-	4869043..4869960	+
NC_013361.1	Escherichia coli O26:H11 str. 11368	5123883..5123990	-	5124088..5125005	+
NC_013364.1	Escherichia coli O111:H- str. 11128	4845570..4845677	-	4845775..4846692	+
NC_013941.1	Escherichia coli O55:H7 str. CB9615	4852564..4852671	-	4852769..4853686	+
NC_016902.1	Escherichia coli KO11FL	4603204..4603311	+	4602189..4603106	-
NC_017625.1	Escherichia coli DH1	4356078..4356185	+	4355063..4355980	-
NC_017626.1	Escherichia coli 042	4632929..4633036	-	4633134..4634051	+
NC_017628.1	Escherichia coli IHE3034	4557488..4557595	-	4557693..4558610	+
NC_017631.1	Escherichia coli ABU 83972	4556919..4557026	-	4557124..4558041	+
NC_017632.1	Escherichia coli UM146	4186643..4186750	-	4186848..4187765	+
NC_017633.1	Escherichia coli ETEC H10407	4580792..4580899	-	4580997..4581914	+
NC_017634.1	Escherichia coli O83:H1 str. NRG 857C	4208026..4208133	-	4208231..4209148	+
NC_017635.1	Escherichia coli W	4422933..4423040	-	4423138..4424055	+
NC_017638.1	Escherichia coli DH1	4137390..4137497	-	4137595..4138512	+
NC_017641.1	Escherichia coli UMNK88	4676741..4676848	-	4676946..4677863	+
NC_017646.1	Escherichia coli O7:K1 str. CE10	4732550..4732657	-	4732755..4733672	+
NC_017651.1	Escherichia coli str. 'clone D i2'	4509893..4510000	-	4510098..4511015	+
NC_017652.1	Escherichia coli str. 'clone D i14'	4509893..4510000	-	4510098..4511015	+
NC_017656.1	Escherichia coli O55:H7 str. RM12579	4760893..4761000	-	4761098..4762015	+
NC_017660.1	Escherichia coli KO11FL	555701..555808	+	554686..555603	-
NC_017663.1	Escherichia coli P12b	4468819..4468926	-	4469024..4469941	+
NC_017664.1	Escherichia coli W	4419414..4419521	-	4419619..4420536	+
NC_017906.1	Escherichia coli Xuzhou21	4891661..4891768	-	4891866..4892783	+
NC_018650.1	Escherichia coli O104:H4 str. 2009EL-2050	4963672..4963779	+	4962657..4963574	-
NC_018658.1	Escherichia coli O104:H4 str. 2011C-3493	4983537..4983644	+	4982522..4983439	-
NC_018661.1	Escherichia coli O104:H4 str. 2009EL-2071	5023101..5023208	+	5022086..5023003	-
NC_020163.1	Escherichia coli APEC O78	125276..125383	-	125481..126398	+
NC_020518.1	Escherichia coli str. K-12 substr. MDS42	3587498..3587605	-	3587703..3588620	+
NC_022364.1	Escherichia coli LY180	4342371..4342478	-	4342576..4343493	+
NZ_CP005930.1	Escherichia coli APEC IMT5155	2307988..2308095	-	2308193..2309110	+
NZ_CP005998.1	Escherichia coli B7A	2816466..2816573	+	2815451..2816368	-
NZ_CP006027.1	Escherichia coli O145:H28 str. RM13514	4958693..4958800	-	4958898..4959815	+
NZ_CP006262.1	Escherichia coli O145:H28 str. RM13516	4776682..4776789	-	4776887..4777804	+
NZ_CP006632.1	Escherichia coli PCN033	4430945..4431052	-	4431150..4432067	+
NZ_CP006636.1	Escherichia coli PCN061	4122398..4122505	-	4122603..4123520	+
NZ_CP006830.1	Escherichia coli APEC O18	3310625..3310732	-	3310830..3311747	+
NZ_CP006834.1	Escherichia coli APEC O2-211	4097630..4097737	+	4096615..4097532	-
NZ_CP007133.1	Escherichia coli O145:H28 str. RM12761	4776686..4776793	-	4776891..4777808	+
NZ_CP007136.1	Escherichia coli O145:H28 str. RM12581	4958690..4958797	-	4958895..4959812	+
NZ_CP007149.1	Escherichia coli RS218	4424241..4424348	-	4424446..4425363	+
NZ_CP007265.1	Escherichia coli	2776992..2777099	+	2775977..2776894	-
NZ_CP007275.1	Escherichia coli	3523186..3523293	-	3523391..3524308	+
NZ_CP007390.1	Escherichia coli	4490215..4490322	+	4489200..4490117	-
NC_009648.1	Klebsiella pneumoniae subsp. pneumoniae MGH 78578	4655095..4655189	-	4655287..4656204	+
NC_012731.1	Klebsiella pneumoniae subsp. pneumoniae NTUH-K2044	112173..112267	-	112365..113282	+
NC_016845.1	Klebsiella pneumoniae subsp. pneumoniae HS11286	112377..112471	-	112569..113486	+
NC_017540.1	Klebsiella pneumoniae KCTC 2242	5109449..5109543	-	5109641..5110558	+
NC_018522.1	Klebsiella pneumoniae subsp. pneumoniae 1084	5239748..5239842	+	5238733..5239650	-
NC_022082.1	Klebsiella pneumoniae JM45	5161684..5161778	+	5160669..5161586	-
NC_022566.1	Klebsiella pneumoniae CG43	4510591..4510685	-	4510783..4511700	+
NZ_CP003999.1	Klebsiella pneumoniae subsp. pneumoniae Kp13	5165394..5165488	+	5164379..5165296	-
NZ_CP006659.2	Klebsiella pneumoniae	112380..112474	-	112572..113489	+
NZ_CP006722.1	Klebsiella pneumoniae subsp. pneumoniae 1158	5193991..5194085	+	5192976..5193893	-
NZ_CP006738.1	Klebsiella pneumoniae HK787	5187536..5187630	+	5186521..5187438	-
NZ_CP006798.1	Klebsiella pneumoniae subsp. pneumoniae PittNDM01	3441490..3441584	+	3440475..3441392	-
NZ_CP006918.1	Klebsiella pneumoniae 30684/NJST258_2	5146504..5146598	+	5145489..5146406	-
NZ_CP006923.1	Klebsiella pneumoniae 30660/NJST258_1	5116577..5116671	+	5115562..5116479	-
NZ_CP007727.1	Klebsiella pneumoniae subsp. pneumoniae KPNIH10	112278..112372	-	112470..113387	+
NZ_CP007731.1	Klebsiella pneumoniae subsp. pneumoniae KPNIH27	114824..114918	-	115016..115933	+
NZ_CP008797.1	Klebsiella pneumoniae subsp. pneumoniae KPNIH24	112278..112372	-	112470..113387	+
NZ_CP008827.1	Klebsiella pneumoniae subsp. pneumoniae KPNIH1	112278..112372	-	112470..113387	+
NZ_CP008831.1	Klebsiella pneumoniae subsp. pneumoniae KPR0928	112278..112372	-	112470..113387	+
NZ_CP008929.1	Klebsiella pneumoniae	1864445..1864539	-	1864637..1865554	+
NZ_CP009114.1	Klebsiella pneumoniae	3620956..3621050	-	3621148..3622065	+
NZ_CP009208.1	Klebsiella pneumoniae subsp. pneumoniae	3308255..3308349	+	3307240..3308157	-
NZ_CP009461.1	Klebsiella pneumoniae	4753887..4753981	+	4752872..4753789	-
NZ_CP009771.1	Klebsiella pneumoniae subsp. pneumoniae	112278..112372	-	112470..113387	+
NZ_CP009775.1	Klebsiella pneumoniae subsp. pneumoniae	112278..112372	-	112470..113387	+
NZ_CP009872.1	Klebsiella pneumoniae subsp. pneumoniae	112278..112372	-	112470..113387	+
NZ_CP009876.1	Klebsiella pneumoniae subsp. pneumoniae	112454..112548	-	112646..113563	+
NZ_CP010361.1	Klebsiella pneumoniae	5197634..5197728	+	5196620..5197536	-
NZ_CP010392.1	Klebsiella pneumoniae	5166778..5166872	+	5165763..5166680	-
NZ_CP011077.1	Klebsiella michiganensis	112750..112869	-	112967..113884	+
NZ_CP011313.1	Klebsiella pneumoniae subsp. pneumoniae	5136490..5136584	+	5135475..5136392	-
NZ_CP011578.1	Klebsiella pneumoniae	3595869..3595963	-	3596061..3596978	+
NZ_CP011597.1	Klebsiella oxytoca	3435391..3435484	+	3434375..3435292	-
NZ_CP011618.1	Klebsiella oxytoca	3456405..3456498	+	3455389..3456306	-
NZ_CP011624.1	Klebsiella pneumoniae	2067801..2067895	+	2066786..2067703	-
NZ_CP011647.1	Klebsiella pneumoniae	1291955..1292049	-	1292147..1293064	+
NZ_CP011976.1	Klebsiella pneumoniae DMC1097	5247057..5247151	+	5246042..5246959	-
NZ_CP011980.1	Klebsiella pneumoniae 500_1420	5161413..5161507	+	5160398..5161315	-
NZ_CP011985.1	Klebsiella pneumoniae UHKPC07	5174166..5174260	+	5173151..5174068	-
NZ_CP011989.1	Klebsiella pneumoniae UHKPC33	5182928..5183022	+	5181913..5182830	-
NZ_CP012426.1	Klebsiella pneumoniae	2665021..2665115	+	2664006..2664923	-
NZ_CP012560.1	Klebsiella pneumoniae	2177108..2177202	+	2176093..2177010	-
NZ_CP012561.1	Klebsiella pneumoniae	781556..781650	+	780541..781458	-
NZ_CP012568.1	Klebsiella pneumoniae	4249035..4249129	-	4249227..4250144	+
NZ_CP012743.1	Klebsiella pneumoniae subsp. pneumoniae	5297694..5297788	+	5296679..5297596	-
NZ_CP012744.1	Klebsiella pneumoniae subsp. pneumoniae	5213479..5213573	+	5212464..5213381	-
NZ_CP012745.1	Klebsiella pneumoniae subsp. pneumoniae	5169303..5169397	+	5168288..5169205	-
NZ_CP012753.1	Klebsiella pneumoniae	3495613..3495707	+	3494598..3495515	-
NZ_CP012883.1	Klebsiella pneumoniae KP-1	2687131..2687225	-	2687323..2688240	+
NZ_CP012987.1	Klebsiella pneumoniae	2642856..2642950	+	2641841..2642758	-
NZ_CP012992.1	Klebsiella pneumoniae	2634461..2634555	+	2633446..2634363	-
NZ_CP013322.1	Klebsiella pneumoniae	2089014..2089108	+	2087999..2088916	-
NZ_CP013711.1	Klebsiella pneumoniae	1223074..1223168	+	1222059..1222976	-
NZ_CP014004.1	Klebsiella pneumoniae subsp. pneumoniae	3502437..3502531	+	3501422..3502339	-
NZ_CP014010.1	Klebsiella pneumoniae subsp. pneumoniae	112623..112717	-	112815..113732	+
NZ_CP014294.1	Klebsiella pneumoniae	5205120..5205214	+	5204105..5205022	-
NZ_CP014647.1	Klebsiella pneumoniae	112278..112372	-	112470..113387	+
NZ_CP014755.1	Klebsiella pneumoniae	112454..112548	-	112646..113563	+
NZ_CP014762.1	Klebsiella pneumoniae	151858..151952	-	152050..152967	+
NZ_CP015025.1	Klebsiella pneumoniae	112454..112548	-	112646..113563	+
NZ_CP015120.1	Klebsiella pneumoniae	5122976..5123070	+	5121961..5122878	-
NZ_CP015130.1	Klebsiella pneumoniae	3382948..3383042	-	3383140..3384057	+
NZ_CP015134.1	Klebsiella pneumoniae	1357398..1357492	-	1357590..1358507	+
NZ_CP015382.1	Klebsiella pneumoniae	5079977..5080071	+	5078962..5079879	-
NZ_CP015385.1	Klebsiella pneumoniae	5201791..5201885	+	5200776..5201693	-
NZ_CP015392.1	Klebsiella pneumoniae	5324073..5324167	+	5323058..5323975	-
NZ_CP015500.1	Klebsiella pneumoniae	5091225..5091319	+	5090210..5091127	-
NZ_CP015753.1	Klebsiella pneumoniae	2864227..2864321	-	2864419..2865336	+
NZ_CP017928.1	Klebsiella oxytoca	4687877..4687970	-	4688069..4688986	+
NZ_CP021696.1	Klebsiella pneumoniae	3808076..3808170	-	3808268..3809185	+
NZ_CP011602.1	Phytobacter ursingii	4426563..4426655	+	4425548..4426465	-
NZ_CP013990.1	Leclercia adecarboxylata	155512..155618	-	155716..156633	+
NC_021066.1	Klebsiella ornithinolytica B6	3990624..3990717	+	3989607..3990524	-
NZ_CP008886.1	Klebsiella ornithinolytica	5385748..5385841	-	5385941..5386858	+
NZ_CP010557.1	Klebsiella ornithinolytica	615213..615332	-	615406..616323	+
NZ_CP013338.1	Klebsiella ornithinolytica	5313636..5313729	+	5312619..5313536	-
NZ_CP017802.1	Raoultella ornithinolytica	308803..308896	-	308996..309913	+
NZ_CP021329.1	Klebsiella ornithinolytica	1221698..1221791	+	1220681..1221598	-
NC_003197.2	Salmonella enterica subsp. enterica serovar Typhimurium str. LT2	4342887..4342996	-	4343093..4344010	+
NC_003198.1	Salmonella enterica subsp. enterica serovar Typhi str. CT18	3608218..3608327	+	3607204..3608121	-
NC_004631.1	Salmonella enterica subsp. enterica serovar Typhi str. Ty2	3593878..3593987	+	3592864..3593781	-
NC_006511.1	Salmonella enterica subsp. enterica serovar Paratyphi A str. ATCC 9150	4116624..4116733	-	4116830..4117747	+
NC_006905.1	Salmonella enterica subsp. enterica serovar Choleraesuis str. SC-B67	4277243..4277352	-	4277449..4278366	+
NC_010102.1	Salmonella enterica subsp. enterica serovar Paratyphi B str. SPB7	4284264..4284373	-	4284470..4285387	+
NC_011080.1	Salmonella enterica subsp. enterica serovar Newport str. SL254	4334499..4334608	-	4334705..4335622	+
NC_011094.1	Salmonella enterica subsp. enterica serovar Schwarzengrund str. CVM19633	4210086..4210195	-	4210292..4211209	+
NC_011147.1	Salmonella enterica subsp. enterica serovar Paratyphi A str. AKU_12601	4112310..4112419	-	4112516..4113433	+
NC_011149.1	Salmonella enterica subsp. enterica serovar Agona str. SL483	4261708..4261817	-	4261914..4262831	+
NC_011205.1	Salmonella enterica subsp. enterica serovar Dublin str. CT_02021853	4373946..4374055	-	4374152..4375069	+
NC_011274.1	Salmonella enterica subsp. enterica serovar Gallinarum str. 287/91	3439355..3439464	+	3438341..3439258	-
NC_011294.1	Salmonella enterica subsp. enterica serovar Enteritidis str. P125109	4215169..4215278	-	4215375..4216292	+
NC_012125.1	Salmonella enterica subsp. enterica serovar Paratyphi C str. RKS4594	4316593..4316702	-	4316799..4317716	+
NC_016810.1	Salmonella enterica subsp. enterica serovar Typhimurium str. SL1344	4364312..4364421	-	4364518..4365435	+
NC_016831.1	Salmonella enterica subsp. enterica serovar Gallinarum/Pullorum str. RKS5078	3562471..3562580	+	3561457..3562374	-
NC_016832.1	Salmonella enterica subsp. enterica serovar Typhi str. P-stx-12	3582675..3582784	+	3581661..3582578	-
NC_016854.1	Salmonella enterica subsp. enterica serovar Typhimurium str. D23580	4365629..4365738	-	4365835..4366752	+
NC_016856.1	Salmonella enterica subsp. enterica serovar Typhimurium str. 14028S	4356459..4356568	-	4356665..4357582	+
NC_016857.1	Salmonella enterica subsp. enterica serovar Typhimurium str. ST4/74	4364313..4364422	-	4364519..4365436	+
NC_016860.1	Salmonella enterica subsp. enterica serovar Typhimurium str. T000240	4447963..4448072	-	4448169..4449086	+
NC_016863.1	Salmonella enterica subsp. enterica serovar Typhimurium str. UK-1	4304065..4304174	-	4304271..4305188	+
NC_017046.1	Salmonella enterica subsp. enterica serovar Typhimurium str. 798	4362864..4362973	-	4363070..4363987	+
NC_020307.1	Salmonella enterica subsp. enterica serovar Javiana str. CFSAN001992	2681521..2681630	+	2680507..2681424	-
NC_021151.1	Salmonella enterica subsp. enterica serovar Typhimurium str. U288	4337772..4337881	-	4337978..4338895	+
NC_021814.1	Salmonella enterica subsp. enterica serovar Typhimurium var. 5- str. CFSAN001921	4084638..4084747	+	4083624..4084541	-
NC_021818.1	Salmonella enterica subsp. enterica serovar Cubana str. CFSAN002050	402070..402179	-	402276..403193	+
NC_021820.1	Salmonella enterica subsp. enterica serovar 4,[5],12:i:- str. 08-1736	55737..55846	+	54723..55640	-
NC_021844.1	Salmonella enterica subsp. enterica serovar Bareilly str. CFSAN000189	4483219..4483328	+	4482205..4483122	-
NC_021902.1	Salmonella enterica subsp. enterica serovar Newport str. USMARC-S3124.1	4629987..4630096	+	4628973..4629890	-
NC_022221.1	Salmonella enterica subsp. enterica serovar Gallinarum/Pullorum str. CDC1983-67	3556101..3556210	+	3555087..3556004	-
NC_022544.1	Salmonella enterica subsp. enterica serovar Typhimurium str. DT2	4301438..4301547	-	4301644..4302561	+
NC_022569.1	Salmonella enterica subsp. enterica serovar Typhimurium str. DT104	4419784..4419893	-	4419990..4420907	+
NC_022991.1	Salmonella enterica subsp. enterica serovar Agona str. 24249	4227198..4227307	-	4227404..4228321	+
NZ_CP007211.2	Salmonella enterica subsp. enterica serovar Anatum str. CDC 06-0532	4421015..4421124	+	4420001..4420918	-
NZ_CP007483.2	Salmonella enterica subsp. enterica serovar Anatum str. USDA-ARS-USMARC-1175	4485276..4485385	+	4484262..4485179	-
NZ_CP007531.1	Salmonella enterica subsp. enterica serovar Anatum str. ATCC BAA-1592	2832949..2833058	+	2831935..2832852	-
NZ_CP007532.1	Salmonella enterica subsp. enterica serovar Abaetetuba str. ATCC 35640	1386539..1386648	-	1386745..1387662	+
NZ_CP007584.2	Salmonella enterica subsp. enterica serovar Anatum str. USDA-ARS-USMARC-1735	4598095..4598204	+	4597081..4597998	-
NZ_CP009049.1	Salmonella enterica subsp. enterica serovar Paratyphi A	136997..137106	-	137203..138120	+
NZ_CP009559.1	Salmonella enterica subsp. enterica serovar Paratyphi A	1347563..1347672	+	1346549..1347466	-
NZ_CP011365.1	Salmonella enterica subsp. enterica serovar Typhimurium	4234035..4234144	-	4234241..4235158	+
NZ_CP013222.1	Salmonella enterica subsp. enterica serovar Anatum	2924972..2925081	+	2923958..2924875	-
NZ_CP013226.1	Salmonella enterica subsp. enterica serovar Anatum	2871027..2871136	+	2870013..2870930	-
NZ_CP014620.1	Salmonella enterica subsp. enterica serovar Anatum str. USDA-ARS-USMARC-1676	4430638..4430747	+	4429624..4430541	-
NZ_CP014621.2	Salmonella enterica subsp. enterica serovar Anatum str. USDA-ARS-USMARC-1727	4636035..4636144	+	4635021..4635938	-
NZ_CP014657.1	Salmonella enterica subsp. enterica serovar Anatum str. USDA-ARS-USMARC-1736	4458051..4458160	+	4457037..4457954	-
NZ_CP014659.2	Salmonella enterica subsp. enterica serovar Anatum str. USDA-ARS-USMARC-1765	4661895..4662004	+	4660881..4661798	-
NZ_CP014661.1	Salmonella enterica subsp. enterica serovar Anatum str. USDA-ARS-USMARC-1783	4452310..4452419	+	4451296..4452213	-
NZ_CP014663.2	Salmonella enterica subsp. enterica serovar Anatum str. USDA-ARS-USMARC-1677	4589974..4590083	+	4588960..4589877	-
NZ_CP014664.1	Salmonella enterica subsp. enterica serovar Anatum str. USDA-ARS-USMARC-1728	4537172..4537281	+	4536158..4537075	-
NZ_CP014665.1	Salmonella enterica subsp. enterica serovar Anatum str. USDA-ARS-USMARC-1766	4504714..4504823	+	4503700..4504617	-
NZ_CP014666.2	Salmonella enterica subsp. enterica serovar Anatum str. USDA-ARS-USMARC-1781	4389296..4389405	+	4388282..4389199	-
NZ_CP015574.1	Salmonella enterica	4655791..4655900	+	4654777..4655694	-
NZ_CP016406.1	Salmonella enterica subsp. enterica serovar Infantis	4666764..4666873	+	4665750..4666667	-
NZ_CP016408.1	Salmonella enterica subsp. enterica serovar Infantis	53991..54100	-	54197..55114	+
NZ_CP016410.1	Salmonella enterica subsp. enterica serovar Infantis	95081..95190	-	95287..96204	+
NZ_CP016412.1	Salmonella enterica subsp. enterica serovar Infantis	4672929..4673038	+	4671915..4672832	-
NZ_CP016837.1	Salmonella enterica subsp. enterica serovar Senftenberg	4676880..4676989	+	4675866..4676783	-
NZ_CP019177.1	Salmonella enterica subsp. enterica serovar Albany str. ATCC 51960	4511872..4511981	+	4510858..4511775	-
NZ_CP019183.1	Salmonella enterica subsp. enterica serovar Mbandaka str. ATCC 51958	4615399..4615508	+	4614385..4615302	-
NZ_CP019185.1	Salmonella enterica subsp. enterica serovar Paratyphi A str. ATCC 11511	4290882..4290991	+	4289868..4290785	-
NZ_CP019192.1	Salmonella enterica subsp. enterica serovar Rubislaw str. ATCC 10717	4290869..4290978	+	4289855..4290772	-
NZ_CP019198.1	Salmonella enterica subsp. enterica serovar Muenster str. 0315	4568957..4569066	+	4567943..4568860	-
NZ_CP019405.1	Salmonella enterica subsp. enterica serovar Bergen str. ST350	3820360..3820469	+	3819346..3820263	-
NZ_CP019413.1	Salmonella enterica subsp. enterica serovar Krefeld str. SA20030536	4409637..4409746	-	4409843..4410760	+
NZ_CP019418.1	Salmonella enterica subsp. enterica serovar Yovokome str. S-1850	4140112..4140221	-	4140318..4141235	+
NZ_CP022489.1	Salmonella enterica subsp. enterica serovar Mbandaka	3672145..3672254	+	3671131..3672048	-
NZ_CP022497.1	Salmonella enterica subsp. enterica serovar Manhattan	1135443..1135552	-	1135649..1136566	+
NZ_LN649235.1	Salmonella enterica subsp. enterica serovar Infantis	4231826..4231935	-	4232032..4232949	+
NC_004337.2	Shigella flexneri 2a str. 301	4178306..4178413	-	4178511..4179428	+
NC_007384.1	Shigella sonnei Ss046	4377680..4377787	-	4377885..4378802	+
NC_007606.1	Shigella dysenteriae Sd197	3532296..3532403	-	3532501..3533418	+
NC_007613.1	Shigella boydii Sb227	4016872..4016979	-	4017077..4017994	+
NC_010658.1	Shigella boydii CDC 3083-94	4158632..4158739	-	4158837..4159754	+
NC_016822.1	Shigella sonnei 53G	4533152..4533259	-	4533357..4534274	+
NZ_CP010829.1	Shigella sonnei	4379568..4379675	-	4379773..4380690	+
NZ_CP011511.1	Shigella boydii	4066558..4066665	-	4066763..4067680	+
NZ_CP014099.1	Shigella sonnei	3344628..3344735	+	3343613..3344530	-
NZ_CP019689.1	Shigella sonnei	2254379..2254486	-	2254584..2255501	+
NZ_CP021144.1	Shigella sonnei	3499789..3499896	-	3499994..3500911	+
NZ_CP022455.1	Shigella sonnei	3379442..3379549	-	3379647..3380564	+
NZ_CP022457.1	Shigella sonnei	1582250..1582357	-	1582455..1583372	+

## Sheet: S3 nonredundant oxyR-neighbors
Gene	Annotation	Total	Divergent	Same_strand	Example_taxa	Family
Hybrid peroxiredoxin hyPrx5 (EC 1.11.1.15)	Hybrid peroxiredoxin hyPrx5 (EC 1.11.1.15) (318)	318	312	6	Aliivibrio finisterrensis	Vibrionaceae
OxyS	Global regulatory RNA OxyS	302	302	0	Escherichia coli	Enterobacteriaceae
Nucleoside-diphosphate-sugar epimerases	Nucleoside-diphosphate-sugar epimerases (262)	262	262	0	Aidingimonas halophila	Halomonadaceae
TonB-dependent receptor	putative TonB-dependent receptor (123); TonB-dependent receptor (2)	125	2	123	Azomonas agilis	Pseudomonadaceae
Alkyl hydroperoxide reductase protein C / AhpC-like	Alkyl hydroperoxide reductase protein C (EC 1.11.1.15) (89); Alkyl hydroperoxide reductase subunit C-like protein (1)	90	90	0	Moraxella atlantae	Moraxellaceae
Alkyl hydroperoxide reductase protein F	Alkyl hydroperoxide reductase protein F (90)	90	0	90	Luteimonas abyssi	Xanthomonadaceae
hypothetical protein	hypothetical protein (89)	89	56	33	Allofrancisella frigidaquae	Francisellaceae
Argininosuccinate lyase (EC 4.3.2.1)	Argininosuccinate lyase (EC 4.3.2.1) (56)	56	0	56	Moellerella wisconsensis	Morganellaceae
Hydrolase, alpha/beta fold family	Hydrolase, alpha/beta fold family (55)	55	0	55	Acinetobacter albensis	Moraxellaceae
5,10-methylenetetrahydrofolate reductase (EC 1.5.1.20)	5,10-methylenetetrahydrofolate reductase (EC 1.5.1.20) (22)	22	0	22	Brenneria alni	Pectobacteriaceae
Uncharacterized MFS-type transporter	Uncharacterized MFS-type transporter (18)	18	18	0	Legionella brunensis	Legionellaceae
Coproporphyrinogen III oxidase, aerobic (EC 1.3.3.3)	Coproporphyrinogen III oxidase, aerobic (EC 1.3.3.3) (15)	15	0	15	Hydrocarboniphaga daqingensis	Sinobacteraceae
Methyl-accepting chemotaxis sensor/transducer protein	Methyl-accepting chemotaxis sensor/transducer protein (15)	15	0	15	Aeromonas allosaccharophila	Aeromonadaceae
Aconitate hydratase (EC 4.2.1.3)	Aconitate hydratase (EC 4.2.1.3) (10); Aconitate hydratase 2 (EC 4.2.1.3) (4)	14	10	4	Dyella ginsengisoli	Rhodanobacteraceae
Catalase-peroxidase KatG (EC 1.11.1.21)	Catalase-peroxidase KatG (EC 1.11.1.21) (12)	12	12	0	Methylobacter tundripaludum	Methylococcaceae
Nitroreductase family protein	Nitroreductase family protein (5); Nitroreductase (3); Putative nitroreductase family protein SACOL0874 (1)	9	9	0	Hydrogenovibrio crunogenus	Piscirickettsiaceae
Argininosuccinate lyase (EC 4.3.2.1) / N-acetylglutamate synthase (EC 2.3.1.1)	Argininosuccinate lyase (EC 4.3.2.1) / N-acetylglutamate synthase (EC 2.3.1.1) (8)	8	0	8	Vibrio cidicii	Vibrionaceae
Chaperone protein ClpB (ATP-dependent unfoldase)	Chaperone protein ClpB (ATP-dependent unfoldase) (8)	8	8	0	Allochromatium palmeri	Chromatiaceae
Thioredoxin-like protein clustered with PA0057	Thioredoxin-like protein clustered with PA0057 (8)	8	0	8	Aeromonas bivalvium	Aeromonadaceae
Membrane alanine aminopeptidase N (EC 3.4.11.2)	Membrane alanine aminopeptidase N (EC 3.4.11.2) (6)	6	5	1	Dyella japonica	Rhodanobacteraceae
NAD-dependent epimerase/dehydratase	NAD-dependent epimerase/dehydratase (6)	6	6	0	Chromohalobacter canadensis	Halomonadaceae
2-oxoglutarate dehydrogenase E1 component (EC 1.2.4.2)	2-oxoglutarate dehydrogenase E1 component (EC 1.2.4.2) (5)	5	5	0	Ignatzschineria indica	Ignatzschineriaceae
Poly(A) polymerase (EC 2.7.7.19)	Poly(A) polymerase (EC 2.7.7.19) (5)	5	5	0	Gilliamella apis	Orbaceae
Rubredoxin	Rubredoxin (5)	5	5	0	Methylophaga aminisulfidivorans	Piscirickettsiaceae
Tetrapartite efflux system, inner membrane component FusBC-like	Tetrapartite efflux system, inner membrane component FusBC-like (5)	5	0	5	Vibrio algivorus	Vibrionaceae
Inositol-1-monophosphatase (EC 3.1.3.25)	Inositol-1-monophosphatase (EC 3.1.3.25) (4)	4	4	0	Thioalkalivibrio halophilus	Ectothiorhodospiraceae
Polyphosphate kinase (EC 2.7.4.1)	Polyphosphate kinase (EC 2.7.4.1) (4)	4	0	4	Nitrincola alkalisediminis	Oceanospirillaceae
Proline dehydrogenase (EC 1.5.5.2) / Delta-1-pyrroline-5-carboxylate dehydrogenase (EC 1.2.1.88)	Proline dehydrogenase (EC 1.5.5.2) / Delta-1-pyrroline-5-carboxylate dehydrogenase (EC 1.2.1.88) (4)	4	0	4	Oceanospirillum linum	Oceanospirillaceae
Putative transmembrane protein	Putative transmembrane protein (4)	4	4	0	Legionella drozanskii	Legionellaceae
ATP-dependent Clp protease proteolytic subunit ClpP (EC 3.4.21.92)	ATP-dependent Clp protease proteolytic subunit ClpP (EC 3.4.21.92) (3)	3	0	3	Pseudohongiella acticola	unclassified
Catalase KatE (EC 1.11.1.6)	Catalase KatE (EC 1.11.1.6) (3)	3	3	0	Methylomonas denitrificans	Methylococcaceae
Cytochrome c551 peroxidase (EC 1.11.1.5)	Cytochrome c551 peroxidase (EC 1.11.1.5) (3)	3	1	2	Colwellia mytili	Colwelliaceae
Dihydrolipoamide dehydrogenase (EC 1.8.1.4)	Dihydrolipoamide dehydrogenase (EC 1.8.1.4) (3)	3	0	3	Oceanisphaera profunda	Aeromonadaceae
Isocitrate dehydrogenase [NADP] (EC 1.1.1.42)	Isocitrate dehydrogenase [NADP] (EC 1.1.1.42) (3)	3	3	0	Competibacter phosphatis	unclassified
Lysyl-tRNA synthetase (class II) (EC 6.1.1.6)	Lysyl-tRNA synthetase (class II) (EC 6.1.1.6) (3)	3	0	3	Aeromonas diversa	Aeromonadaceae
MBL-fold metallo-hydrolase superfamily	MBL-fold metallo-hydrolase superfamily (3)	3	2	1	Pseudoxanthomonas kalamensis	Xanthomonadaceae
N-acetylornithine deacetylase (EC 3.5.1.16)	N-acetylornithine deacetylase (EC 3.5.1.16) (3)	3	3	0	Arsenophonus endosymbiont	Morganellaceae
NADH ubiquinone oxidoreductase chain A (EC 1.6.5.3)	NADH ubiquinone oxidoreductase chain A (EC 1.6.5.3) (3)	3	3	0	Pseudomonas anguilliseptica	Pseudomonadaceae
Porphobilinogen deaminase (EC 2.5.1.61)	Porphobilinogen deaminase (EC 2.5.1.61) (3)	3	3	0	Chelonobacter oris	Pasteurellaceae
Rubrerythrin	Rubrerythrin (3)	3	3	0	Haliea salexigens	Halieaceae
Thioredoxin	Thioredoxin (3)	3	3	0	Halothiobacillus neapolitanus	Halothiobacillaceae
UDP-N-acetylenolpyruvoylglucosamine reductase (EC 1.3.1.98)	UDP-N-acetylenolpyruvoylglucosamine reductase (EC 1.3.1.98) (3)	3	3	0	Bibersteinia trehalosi	Pasteurellaceae
1-deoxy-D-xylulose 5-phosphate synthase (EC 2.2.1.7)	1-deoxy-D-xylulose 5-phosphate synthase (EC 2.2.1.7) (2)	2	0	2	Marinospirillum insulare	Oceanospirillaceae
ApaG protein	ApaG protein (2)	2	0	2	Aquicella lusitana	Coxiellaceae
ATP-dependent DNA helicase RecG (EC 3.6.4.12)	ATP-dependent DNA helicase RecG (EC 3.6.4.12) (2)	2	0	2	Pseudomonas acidophila	Pseudomonadaceae
Biosynthetic arginine decarboxylase (EC 4.1.1.19)	Biosynthetic arginine decarboxylase (EC 4.1.1.19) (2)	2	0	2	Thiorhodospira sibirica	Ectothiorhodospiraceae
diguanylate cyclase/phosphodiesterase (GGDEF & EAL domains) with PAS/PAC sensor(s)	diguanylate cyclase/phosphodiesterase (GGDEF & EAL domains) with PAS/PAC sensor(s) (2)	2	0	2	Thiohalomonas denitrificans	Ectothiorhodospiraceae
Glutamine--fructose-6-phosphate aminotransferase [isomerizing] (EC 2.6.1.16)	Glutamine--fructose-6-phosphate aminotransferase [isomerizing] (EC 2.6.1.16) (2)	2	0	2	Alkalispirillum mobile	Ectothiorhodospiraceae
Lactoylglutathione lyase	Lactoylglutathione lyase (2)	2	0	2	Lysobacter lycopersici	Xanthomonadaceae
Membrane protein	Membrane protein (2)	2	0	2	Photobacterium lutimaris	Vibrionaceae
Na(+) H(+) antiporter subunit E	Na(+) H(+) antiporter subunit E (2)	2	2	0	Amphritea balenae	Oceanospirillaceae
Polysaccharide biosynthesis protein	Polysaccharide biosynthesis protein (2)	2	2	0	Thiothrix caldifontis	Thiotrichaceae
Putative permease	Putative permease (2)	2	0	2	Glaesserella parasuis	Pasteurellaceae
RidA/YER057c/UK114 superfamily protein	RidA/YER057c/UK114 superfamily protein (2)	2	0	2	Halioglobus lutimaris	Halieaceae
Transposase	Transposase (2)	2	1	1	Litorilituus sediminis	Colwelliaceae
Uncharacterized membrane protein PA1577	Uncharacterized membrane protein PA1577 (2)	2	1	1	Piscirickettsia salmonis	Piscirickettsiaceae
1,4-alpha-glucan (glycogen) branching enzyme, GH-13-type (EC 2.4.1.18)	1,4-alpha-glucan (glycogen) branching enzyme, GH-13-type (EC 2.4.1.18) (1)	1	0	1	Thiohalocapsa marina	Chromatiaceae
2-methylcitrate dehydratase (EC 4.2.1.79)	2-methylcitrate dehydratase (EC 4.2.1.79) (1)	1	1	0	Vibrio nigripulchritudo	Vibrionaceae
2-phosphosulfolactate phosphatase	2-phosphosulfolactate phosphatase (1)	1	1	0	Teredinibacter turnerae	Cellvibrionaceae
3',5'-cyclic-nucleotide phosphodiesterase (EC 3.1.4.17)	3',5'-cyclic-nucleotide phosphodiesterase (EC 3.1.4.17) (1)	1	1	0	Thiodiazotropha endoloripes	Sedimenticolaceae
3-hydroxybutyryl-CoA dehydrogenase (EC 1.1.1.157); 3-hydroxyacyl-CoA dehydrogenase (EC 1.1.1.35)	3-hydroxybutyryl-CoA dehydrogenase (EC 1.1.1.157); 3-hydroxyacyl-CoA dehydrogenase (EC 1.1.1.35) (1)	1	0	1	Thiothrix flexilis	Thiotrichaceae
Amidases related to nicotinamidase	Amidases related to nicotinamidase (1)	1	1	0	Acidihalobacter ferrooxidans	Ectothiorhodospiraceae
Capsular polysaccharide biosynthesis protein	Capsular polysaccharide biosynthesis protein (1)	1	1	0	Thiothrix nivea	Thiotrichaceae
Chemotaxis protein CheD	Chemotaxis protein CheD (1)	1	1	0	Lamprocystis purpurea	Chromatiaceae
Cytoplasmic beta-glucosidase (EC 3.2.1.21)	Cytoplasmic beta-glucosidase (EC 3.2.1.21) (1)	1	0	1	Marinomonas mediterranea	Oceanospirillaceae
D-glycero-beta-D-manno-heptose 1-phosphate adenylyltransferase (EC 2.7.7.70) / D-glycero-beta-D-manno-heptose-7-phosphate kinase (EC 2.7.1.167)	D-glycero-beta-D-manno-heptose 1-phosphate adenylyltransferase (EC 2.7.7.70) / D-glycero-beta-D-manno-heptose-7-phosphate kinase (EC 2.7.1.167) (1)	1	1	0	Allochromatium warmingii	Chromatiaceae
Diacylglycerol kinase (EC 2.7.1.107)	Diacylglycerol kinase (EC 2.7.1.107) (1)	1	0	1	Cycloclasticus pugetii	Piscirickettsiaceae
Efflux ABC transporter, permease/ATP-binding protein	Efflux ABC transporter, permease/ATP-binding protein (1)	1	0	1	Thioalkalivibrio denitrificans	Ectothiorhodospiraceae
FIG003737: Predicted deacylase	FIG003737: Predicted deacylase (1)	1	0	1	Thioflavicoccus mobilis	Chromatiaceae
FIG005429: hypothetical protein	FIG005429: hypothetical protein (1)	1	0	1	Methylosarcina fibrata	Methylococcaceae
FKBP-type peptidyl-prolyl cis-trans isomerase FkpA precursor (EC 5.2.1.8)	FKBP-type peptidyl-prolyl cis-trans isomerase FkpA precursor (EC 5.2.1.8) (1)	1	1	0	Pasteurella dagmatis	Pasteurellaceae
Flagellar motor rotation protein MotB	Flagellar motor rotation protein MotB (1)	1	0	1	Sulfuriflexus mobilis	Granulosicoccaceae
Free methionine-(R)-sulfoxide reductase, contains GAF domain	Free methionine-(R)-sulfoxide reductase, contains GAF domain (1)	1	0	1	Gallibacterium anatis	Pasteurellaceae
glutathione peroxidase	glutathione peroxidase (1)	1	1	0	Brenneria nigrifluens	Pectobacteriaceae
IS1004 transposase	IS1004 transposase (1)	1	0	1	Erwinia tracheiphila	Erwiniaceae
L-Proline/Glycine betaine transporter ProP	L-Proline/Glycine betaine transporter ProP (1)	1	0	1	Morganella psychrotolerans	Morganellaceae
Lysine decarboxylase family	Lysine decarboxylase family (1)	1	1	0	Moraxella lincolnii	Moraxellaceae
Mannose-6-phosphate isomerase	Mannose-6-phosphate isomerase (1)	1	0	1	Colwellia polaris	Colwelliaceae
Metallo-beta-lactamase superfamily protein PA0057	Metallo-beta-lactamase superfamily protein PA0057 (1)	1	0	1	Aeromonas fluvialis	Aeromonadaceae
Methionine ABC transporter substrate-binding protein	Methionine ABC transporter substrate-binding protein (1)	1	0	1	Gallibacterium salpingitidis	Pasteurellaceae
Mobile element protein	Mobile element protein (1)	1	0	1	Xenorhabdus doucetiae	Morganellaceae
Molybdopterin synthase catalytic subunit MoaE (EC 2.8.1.12)	Molybdopterin synthase catalytic subunit MoaE (EC 2.8.1.12) (1)	1	1	0	Lysobacter silvestris	Xanthomonadaceae
Nitric oxide reductase activation protein NorD	Nitric oxide reductase activation protein NorD (1)	1	1	0	Sulfurifustis variabilis	Acidiferrobacteraceae
Nudix-related transcriptional regulator NrtR	Nudix-related transcriptional regulator NrtR (1)	1	0	1	Methylovulum psychrotolerans	Methylococcaceae
Peptide chain release factor N(5)-glutamine methyltransferase (EC 2.1.1.297)	Peptide chain release factor N(5)-glutamine methyltransferase (EC 2.1.1.297) (1)	1	1	0	Frateuria aurantia	Rhodanobacteraceae
Peroxiredoxin family protein	Peroxiredoxin family protein (1)	1	1	0	Methylospira mobilis	Methylococcaceae
Peroxiredoxin family protein/glutaredoxin	Peroxiredoxin family protein/glutaredoxin (1)	1	1	0	Haemophilus pittmaniae	Pasteurellaceae
Phosphoethanolamine transferase EptC [E.coli], specific for LPS heptose I residue	Phosphoethanolamine transferase EptC [E.coli], specific for LPS heptose I residue (1)	1	0	1	Cycloclasticus zancles	Piscirickettsiaceae
Phosphoglycerate mutase (EC 5.4.2.11)	Phosphoglycerate mutase (EC 5.4.2.11) (1)	1	1	0	Thiohalophilus thiocyanatoxydans	Thioalkalispiraceae
Protein SprT	Protein SprT (1)	1	1	0	Nicoletella semolina	Pasteurellaceae
putative pyrophosphatase	putative pyrophosphatase (1)	1	1	0	Balneatrix alpica	Balneatrichaceae
Putative sulfate permease	Putative sulfate permease (1)	1	0	1	Pseudomonas salegens	Pseudomonadaceae
related to glutamate dehydrogenase	related to glutamate dehydrogenase (1)	1	0	1	Sedimenticola selenatireducens	unclassified
Septum site-determining protein MinC	Septum site-determining protein MinC (1)	1	1	0	Aeromonas cavernicola	Aeromonadaceae
Serine protease	Serine protease (1)	1	0	1	Dyella jiangningensis	Rhodanobacteraceae
Soluble cytochrome b562	Soluble cytochrome b562 (1)	1	1	0	Tolumonas auensis	Aeromonadaceae
Sugar fermentation stimulation protein SfsA	Sugar fermentation stimulation protein SfsA (1)	1	0	1	Thiosymbion ectosymbiont	Chromatiaceae
Tellurite resistance protein TehB	Tellurite resistance protein TehB (1)	1	0	1	Kangiella geojedonensis	Kangiellaceae
Transcriptional repressor of ectoine biosynthetic genes	Transcriptional repressor of ectoine biosynthetic genes (1)	1	0	1	Aestuariicella hydrocarbonica	Alteromonadales genera incertae sedis
Transporter, LysE family	Transporter, LysE family (1)	1	0	1	Colwellia piezophila	Colwelliaceae
Transposase and inactivated derivatives, IS30 family	Transposase and inactivated derivatives, IS30 family (1)	1	0	1	Pseudomonas baetica	Pseudomonadaceae
TRAP-type C4-dicarboxylate transport system, large permease component	TRAP-type C4-dicarboxylate transport system, large permease component (1)	1	0	1	Thiolapillus brandeum	Sedimenticolaceae
tRNA (guanosine(18)-2'-O)-methyltransferase (EC 2.1.1.34)	tRNA (guanosine(18)-2'-O)-methyltransferase (EC 2.1.1.34) (1)	1	1	0	Psychromonas ingrahamii	Psychromonadaceae
tRNA t(6)A37-methylthiotransferase (EC 2.8.4.5)	tRNA t(6)A37-methylthiotransferase (EC 2.8.4.5) (1)	1	0	1	Solemya velum	unclassified
Tryptophanyl-tRNA synthetase (EC 6.1.1.2)	Tryptophanyl-tRNA synthetase (EC 6.1.1.2) (1)	1	0	1	Mannheimia varigena	Pasteurellaceae
Two-component transcriptional response regulator, LuxR family	Two-component transcriptional response regulator, LuxR family (1)	1	0	1	Arhodomonas aquaeolei	Ectothiorhodospiraceae
Uncharacterized protein YfgD, not an arsenate reductase	Uncharacterized protein YfgD, not an arsenate reductase (1)	1	1	0	Thiosymbion oneisti	Chromatiaceae
Uncharacterized proteins YbdD and YjiX	Uncharacterized proteins YbdD and YjiX (1)	1	1	0	Schmidhempelia bombi	Orbaceae

## Sheet: S4 oxi-stress-related neighbors
Neighbor	Number of divergent loci	Example taxa	Family	Functional group	Potential oxidative-stress-related role
Nucleoside-diphosphate-sugar epimerases	262	Aidingimonas halophila	Halomonadaceae	Cell-envelope glycan/LPS/capsule functions	Nucleotide-sugar metabolism enzyme involved in cell-envelope glycan/LPS/capsule biosynthesis; may indirectly affect oxidative-stress tolerance through envelope composition.
NAD-dependent epimerase/dehydratase	6	Chromohalobacter canadensis	Halomonadaceae	Cell-envelope glycan/LPS/capsule functions	NAD-dependent nucleotide-sugar modifying enzyme; may indirectly affect oxidative-stress tolerance through cell-envelope glycan metabolism.
UDP-N-acetylenolpyruvoylglucosamine reductase (EC 1.3.1.98)	3	Bibersteinia trehalosi	Pasteurellaceae	Cell-envelope glycan/LPS/capsule functions	NADPH-dependent peptidoglycan-biosynthesis reductase; may link cell-envelope maintenance with redox metabolism.
Polysaccharide biosynthesis protein	2	Thiothrix caldifontis	Thiotrichaceae	Cell-envelope glycan/LPS/capsule functions	Cell-surface polysaccharide biosynthesis protein; envelope polysaccharides can influence oxidant susceptibility and stress survival.
Capsular polysaccharide biosynthesis protein	1	Thiothrix nivea	Thiotrichaceae	Cell-envelope glycan/LPS/capsule functions	Capsule biosynthesis protein; capsular polysaccharides can protect cells from environmental and host-associated oxidative stress.
D-glycero-beta-D-manno-heptose 1-phosphate adenylyltransferase (EC 2.7.7.70) / D-glycero-beta-D-manno-heptose-7-phosphate kinase (EC 2.7.1.167)	1	Allochromatium warmingii	Chromatiaceae	Cell-envelope glycan/LPS/capsule functions	LPS inner-core heptose biosynthesis enzyme; LPS structure can influence envelope integrity and oxidative-stress susceptibility.
TonB-dependent receptor	2	Thioalkalivibrio sulfidophilus	Ectothiorhodospiraceae	Metal/nutrient acquisition with possible oxidative-stress link	Outer-membrane receptor for nutrient or metal acquisition; may indirectly affect oxidative stress through iron/heme or envelope-associated physiology.
Hybrid peroxiredoxin hyPrx5 (EC 1.11.1.15)	312	Aliivibrio finisterrensis	Vibrionaceae	Peroxide detoxification enzymes	Peroxiredoxin-family peroxide reductase with fused redox domains; reduces hydrogen peroxide and organic hydroperoxides.
Alkyl hydroperoxide reductase protein C (EC 1.11.1.15)	90	Moraxella atlantae	Moraxellaceae	Peroxide detoxification enzymes	Peroxiredoxin-family alkyl hydroperoxide reductase subunit; reduces hydrogen peroxide and organic hydroperoxides.
Catalase-peroxidase KatG (EC 1.11.1.21)	12	Methylobacter tundripaludum	Methylococcaceae	Peroxide detoxification enzymes	Bifunctional heme catalase-peroxidase that detoxifies hydrogen peroxide.
Catalase KatE (EC 1.11.1.6)	3	Methylomonas denitrificans	Methylococcaceae	Peroxide detoxification enzymes	Heme catalase that decomposes hydrogen peroxide to water and oxygen.
Rubrerythrin	3	Haliea salexigens	Halieaceae	Peroxide detoxification enzymes	Non-heme iron peroxide reductase associated with oxidative and peroxide stress defense.
Cytochrome c551 peroxidase (EC 1.11.1.5)	1	Thiogranum longum	Ectothiorhodospiraceae	Peroxide detoxification enzymes	Periplasmic cytochrome c peroxidase that reduces hydrogen peroxide using cytochrome c-derived electrons.
glutathione peroxidase	1	Brenneria nigrifluens	Pectobacteriaceae	Peroxide detoxification enzymes	Glutathione-dependent peroxidase that reduces peroxides and protects against oxidative damage.
Peroxiredoxin family protein	1	Methylospira mobilis	Methylococcaceae	Peroxide detoxification enzymes	Peroxiredoxin-family thiol peroxidase; predicted peroxide detoxification.
Peroxiredoxin family protein/glutaredoxin	1	Haemophilus pittmaniae	Pasteurellaceae	Peroxide detoxification enzymes	Peroxiredoxin/glutaredoxin-family redox protein; predicted peroxide detoxification or thiol-redox repair.
Chaperone protein ClpB (ATP-dependent unfoldase)	8	Allochromatium palmeri	Chromatiaceae	Protein quality control/envelope protein folding	ATP-dependent protein disaggregase that helps recover proteins damaged or aggregated during stress, including oxidative stress.
FKBP-type peptidyl-prolyl cis-trans isomerase FkpA precursor (EC 5.2.1.8)	1	Pasteurella dagmatis	Pasteurellaceae	Protein quality control/envelope protein folding	Periplasmic protein-folding factor/chaperone; may support envelope protein folding during stress.
Nitroreductase family protein	9	Hydrogenovibrio crunogenus	Piscirickettsiaceae	Redox detoxification/electron-transfer proteins	Flavin-dependent oxidoreductase family protein; can reduce nitro/electrophilic substrates and contribute to redox detoxification.
Rubredoxin	5	Methylophaga aminisulfidivorans	Piscirickettsiaceae	Redox detoxification/electron-transfer proteins	Small iron-containing electron-transfer protein involved in redox reactions and stress-associated electron transfer.
Thioredoxin	3	Halothiobacillus neapolitanus	Halothiobacillaceae	Redox detoxification/electron-transfer proteins	Thioredoxin redox protein involved in thiol-disulfide exchange and repair of oxidized proteins.
Soluble cytochrome b562	1	Tolumonas auensis	Aeromonadaceae	Redox detoxification/electron-transfer proteins	Small cytochrome electron-transfer protein involved in redox reactions.
Aconitate hydratase (EC 4.2.1.3)	10	Frateuria terrea	Rhodanobacteraceae	Reducing power, redox metabolism, and cofactor biosynthesis	Iron-sulfur TCA-cycle enzyme that interconverts citrate, cis-aconitate, and isocitrate; aconitases are oxidant-sensitive enzymes.
2-oxoglutarate dehydrogenase E1 component (EC 1.2.4.2)	5	Ignatzschineria indica	Ignatzschineriaceae	Reducing power, redox metabolism, and cofactor biosynthesis	Central metabolic dehydrogenase component; participates in oxidative decarboxylation and redox metabolism.
Isocitrate dehydrogenase [NADP] (EC 1.1.1.42)	3	Competibacter phosphatis	unclassified	Reducing power, redox metabolism, and cofactor biosynthesis	NADP-dependent enzyme that generates NADPH, a key reductant for antioxidant systems.
NADH ubiquinone oxidoreductase chain A (EC 1.6.5.3)	3	Pseudomonas anguilliseptica	Pseudomonadaceae	Reducing power, redox metabolism, and cofactor biosynthesis	Respiratory electron-transfer complex I subunit; participates in redox metabolism and can influence oxidative-stress physiology.
Porphobilinogen deaminase (EC 2.5.1.61)	3	Chelonobacter oris	Pasteurellaceae	Reducing power, redox metabolism, and cofactor biosynthesis	Tetrapyrrole/heme-biosynthesis enzyme; may influence oxidative physiology through heme-dependent respiratory and antioxidant proteins.
OxyS sRNA	302	Escherichia coli	Enterobacteriaceae	Regulatory RNA	Decreases the frequency of oxidative-stress-induced mutations.

## Sheet: S5 phylogenetic marker genes
Product Name	Gene Symbol	HMM Accession
30S ribosome-binding factor RbfA	rbfA	TIGR00082
30S ribosomal protein S15	rpsO	TIGR00952
30S ribosomal protein S20	rpsT	TIGR00029
30S ribosomal protein S5	rpsE	TIGR01021
50S ribosomal protein L16	rplP	TIGR01164
50S ribosomal protein L18	rplR	TIGR00060
50S ribosomal protein L20	rplT	TIGR01032
50S ribosomal protein L22	rplV	TIGR01044
50S ribosomal protein L24	rplX	TIGR01079
alanine--tRNA ligase	alaS	TIGR00344
chromosomal replication initiator protein DnaA	dnaA	TIGR00362
dephospho-CoA kinase	coaE	TIGR00152
DNA topoisomerase (ATP-hydrolyzing) subunit A	gyrA	TIGR01063
DNA topoisomerase (ATP-hydrolyzing) subunit B	gyrB	TIGR01059
glutamine hydrolyzing CTP synthase	pyrG	TIGR00337
guanylate kinase	gmk	TIGR03263
methionyl-tRNA formyltransferase	fmt	TIGR00460
phenylalanine--tRNA ligase subunit alpha	pheS	TIGR00468
redox-regulated ATPase YchF	ychF	TIGR00092
ribosome biogenesis GTPase Der	der	TIGR03594
ribosome recycling factor	frr	TIGR00496
signal recognition particle protein	ffh	TIGR00959
SsrA-binding protein	smpB	TIGR00086
transcription termination factor NusA	nusA	TIGR01953
trigger factor	tig	TIGR00115
